# Supplementary material for: Photoredox chromium and cobalt dual catalysis for carbonyl allylation with butadiene via allyl radical intermediates
Source: Royal Society of Chemistry journal article supplement (doi:10.1039/d3qo01403g), 2023-12-18

Supplementary Information

**Photoredox Chromium and Cobalt Dual Catalysis for Carbonyl Allylation with Butadiene via Allyl Radical Intermediates**

Huaipu Yan,<sup>‡[a]</sup> Dandan Zhang,<sup>‡[a]</sup> Yonghong Liu,<sup>[a]</sup> Xin Wang,<sup>[a]</sup> Zhixian Wu,<sup>[a]</sup> Yunhe Jin,<sup>[a]</sup> Xiaobo Ding,<sup>[b]</sup> Jing-Ran Shan,<sup>[c]</sup> Erjun Hao,<sup>\*[b]</sup> and Lei Shi<sup>\*[a,b]</sup>

<sup>a</sup> School of Chemistry, Dalian University of Technology, 116024, Dalian, China.

<sup>b</sup> School of Chemistry and Chemical Engineering, Henan Normal University, Xinxiang, 453007, China.

<sup>c</sup> Department of Chemistry and Biochemistry, University of California Los Angeles, Los Angeles, California 90095, United States.

<sup>‡</sup> Huaipu Yan, Dandan Zhang: These authors contributed equally.

**Corresponding Author**

\* \* Lei Shi, [orcid.org/0000-0002-2644-1168](https://orcid.org/0000-0002-2644-1168), E-mail: [shilei17@dlut.edu.cn](mailto:shilei17@dlut.edu.cn).

## Contents

|                                                                     |    |
|---------------------------------------------------------------------|----|
| 1. General information .....                                        | 3  |
| 2. Picture of reaction set-up .....                                 | 4  |
| 3. Detailed optimizations of conditions .....                       | 6  |
| 4. General procedure .....                                          | 7  |
| 5. Theoretical calculations .....                                   | 8  |
| 6. Mechanistic studies .....                                        | 18 |
| 7. Characterization of products.....                                | 19 |
| 8. Supplementary Reference .....                                    | 31 |
| 9. $^1\text{H}$ and $^{13}\text{C}$ -NMR spectra of compounds ..... | 32 |

## 1. General information

Unless otherwise noted, all reactions of substrates preparation were conducted in flame-dried glassware under a nitrogen atmosphere using anhydrous solvent passed through an activated alumina column (Innovative Technology). Commercially available reagents were used without further purification. Thin layer chromatography (TLC) was performed using Huanghai TLC silica gel plates HSG F254 and visualized using UV light, anisaldehyde or potassium permanganate. The photocatalytic reactions were performed on WATTCAS Parallel Light Reactor (WP-TEC-1020L) with 10 W LED.  $^1\text{H}$  and  $^{13}\text{C}$  NMR spectra were recorded in  $\text{CDCl}_3$  on a Bruker 400M spectrometer. Chemical shifts in  $^1\text{H}$  NMR spectra were reported in parts per million (ppm) on the  $\delta =$  scale from an internal standard of residual  $\text{CDCl}_3$  (7.26 ppm). Data for  $^1\text{H}$  NMR were reported as follows: chemical shift, multiplicity (s = singlet, d = doublet, t = triplet, q = quartet, m = multiplet, br = broad), coupling constant in Hertz (Hz) and integration. Data for  $^{13}\text{C}$  NMR spectra were reported in terms of chemical shift in ppm from the central peak of  $\text{CDCl}_3$  (77.00 ppm). ESI mass spectra were obtained from an HPLC-Q-ToF mass spectrometer using acetonitrile as the mobile phase.

## 2. Picture of reaction set-up

The photocatalytic reactions were performed on WATTCAS Parallel Light Reactor (WP-TEC-1020L).

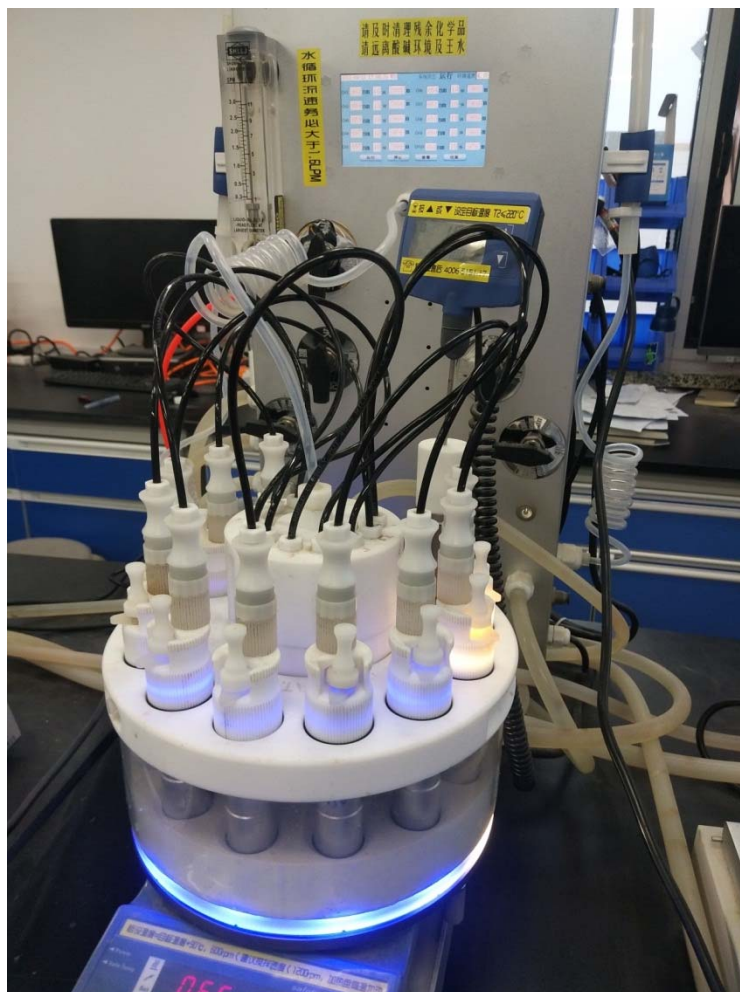

**Figure S1** Picture of the photoreactor

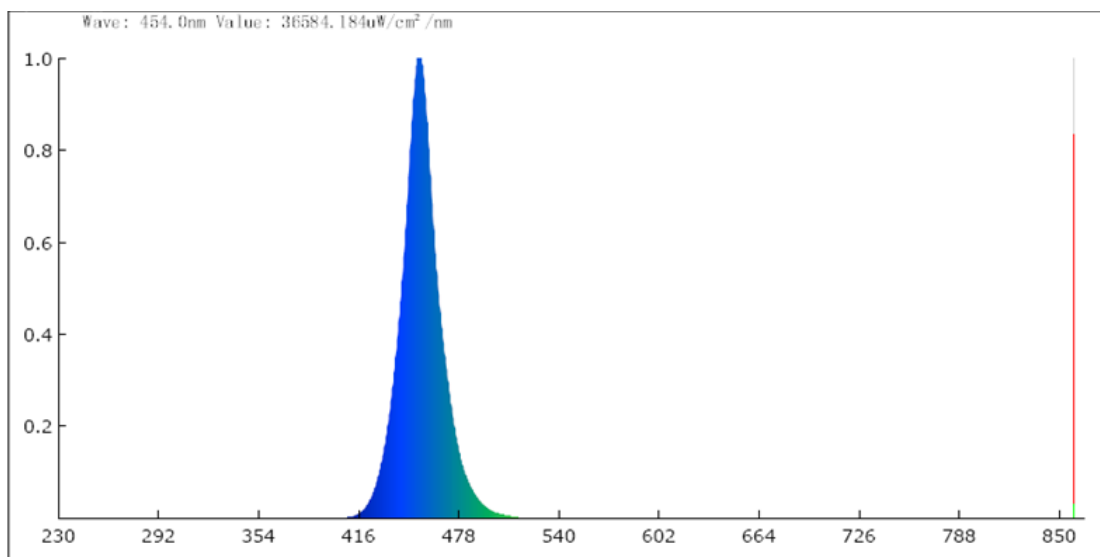

**Figure S2** Emission spectra of the 10 W blue LED lamp (maximum emission at  $\lambda = 454$  nm). Wave length: 450 nm-455 nm Quartz glass was used as reaction vessel. Distance between light source and quartz tube was approximately 0.5 cm and no filter was used for the reaction

### 3. Detailed optimizations of conditions

**Table S1.** Reaction Optimization <sup>a, b, c</sup>.

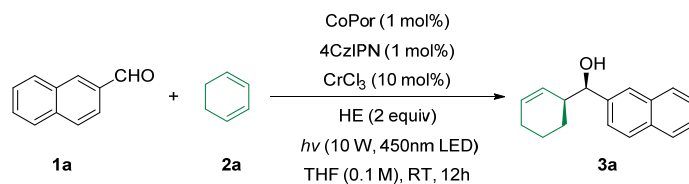

| entry | variation from standard conditions                                            | yield (%) |
|-------|-------------------------------------------------------------------------------|-----------|
| 1     | none                                                                          | 89        |
| 2     | Vitamin B12 instead of CoPor                                                  | 0         |
| 3     | Co(dmgh) <sub>2</sub> PyCl(II) instead of CoPor                               | 0         |
| 4     | Co(salen) instead of CoPor                                                    | 0         |
| 5     | CoBr <sub>2</sub> (10 mol%)+dppb (10 mol%) instead of CoPor                   | trace     |
| 6     | CoBr <sub>2</sub> (10 mol%)+dppb (10 mol%) instead of CoPor+CrCl <sub>3</sub> | trace     |
| 7     | DCM                                                                           | trace     |
| 8     | MeCN                                                                          | 74        |
| 9     | DMF                                                                           | 33        |
| 10    | PhMe                                                                          | 7         |
| 11    | EtOH                                                                          | 75        |
| 12    | CoPor (0.1 mol%) used                                                         | 88        |
| 13    | CoPor (0.01 mol%) used                                                        | 30        |
| 14    | <b>Ru-1</b> instead of 4CzIPN                                                 | 72        |
| 15    | <b>Ir-1</b> instead of 4CzIPN                                                 | 85        |
| 16    | <b>Ir-2</b> instead of 4CzIPN                                                 | 79        |
| 17    | No <i>hν</i>                                                                  | 0         |
| 18    | No CoPor                                                                      | 0         |
| 19    | No CrCl <sub>3</sub>                                                          | 0         |
| 20    | No 4CzIPN                                                                     | 0         |
| 21    | No HE                                                                         | 0         |

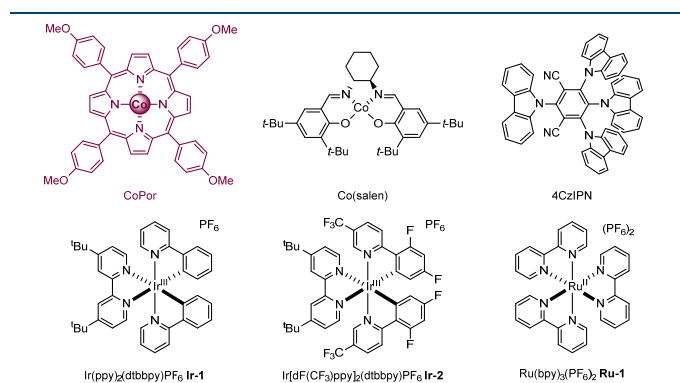

<sup>a</sup>Reactions were performed on a 0.2 mmol scale of **1a**, **2a** (2.0 equiv.), 4CzIPN (1 mol%), CoPor (1 mol%), CrCl<sub>3</sub> (10 mol%), HE (2.0 equiv.), THF (c = 0.1M), 10 W blue LEDs, RT, 12 h. <sup>b</sup>Yields were determined by <sup>1</sup>H NMR spectroscopy versus dimethyl terephthalate as an internal standard.

<sup>c</sup>Diastereomeric ratios were determined by <sup>1</sup>H NMR spectroscopy of crude products.

#### 4. General procedure

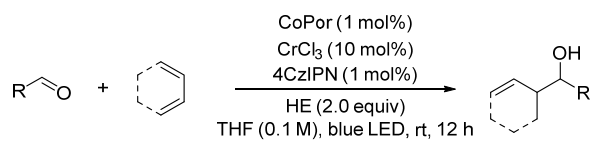

**General procedure :** In a nitrogen-filled glovebox, a 25 mL Schlenk tube was charged with 4CzIPN (4.0 mg, 0.005 mmol, 1 mol%), CoPor (4.0 mg, 0.005 mmol, 1 mol%), CrCl<sub>3</sub> (7.9 mg, 0.05 mmol, 10 mol%), HE (253.3 mg, 1 mmol, 2.0 equiv.). Then the Schlenk tube was sealed with a plug and removed from glovebox. Under nitrogen atmosphere, aldehyde (0.5 mmol), diene (1.0 mmol) and THF (5 mL, 0.1 M) was sequentially added into the tube. The tube was stirred under irradiation with 450 nm LED at room temperature for 12 h. The mixture was then concentrated in vacuo. The crude product was purified by flash column chromatography (silica gel, PE/EA) to afford the desired product.

## 5. Theoretical calculations

**Computational details:** DFT calculations were performed with Gaussian 16<sup>[1]</sup>. Geometries for intermediates and transition states were optimized in the gas phase using the  $\omega$ B97XD functional<sup>[2]</sup>. Cobalt atom was represented by the LANL2TZ(f) basis set<sup>[3]</sup>. All atoms of 1,3-butadiene, N atoms in the porphyrin and the hydride H atom were described by 6-31G\*\* basis set<sup>[4]</sup>. Four substituents on the porphyrin were described by STO-3G basis set<sup>[5]</sup>. Other atoms in the porphyrin were described by 6-31G basis set.

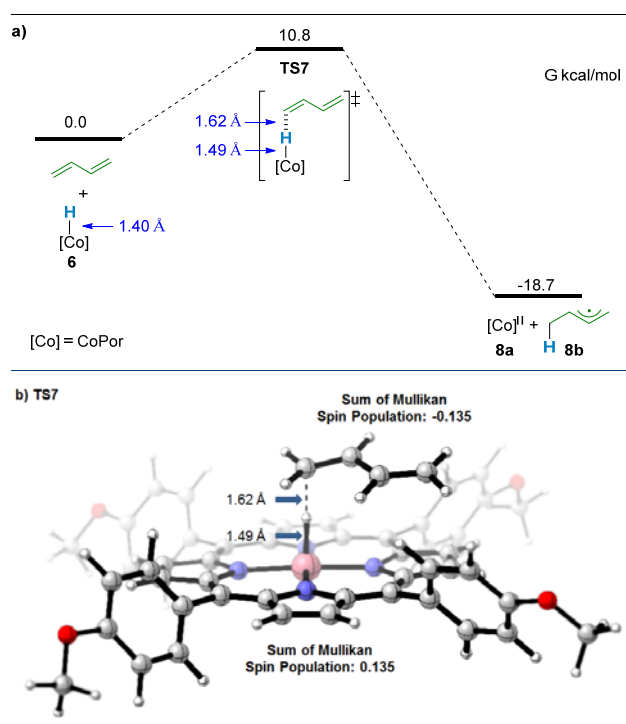

**Figure S3.** a) Computed energy profile of the MHAT between H- CoPor and 1,3-butadiene. b) Computed structure of the transition state TS7 of the MHAT between CoPor hydride complex and 1,3-butadiene.



**Co(Por)(H)\_1,3-butadiene\_Reactant Adduct**

SCRF in THF: -3910.196926 Hartree

Lowest frequency: 7.75 cm-1

Gibbs energy in THF: -3909.418901 Hartree

Charge: 0 Multiplicity: 1

|    |             |             |             |
|----|-------------|-------------|-------------|
| Co | -0.08973600 | 0.08561100  | -0.19048600 |
| N  | 0.10668200  | -1.87706100 | -0.31610900 |
| N  | -2.04774900 | -0.11284000 | -0.21967200 |
| N  | -0.28584000 | 2.04665300  | -0.21813900 |
| N  | 1.86913000  | 0.28268200  | -0.30732400 |
| C  | 1.27774200  | -2.60265000 | -0.41656000 |
| C  | 1.00219600  | -4.01664900 | -0.39925400 |
| C  | -0.33851000 | -4.15363200 | -0.24837200 |
| C  | -0.89281600 | -2.82414700 | -0.21398100 |
| C  | -2.25485500 | -2.57448700 | -0.09345400 |
| C  | -2.76969700 | -1.28408500 | -0.11664900 |
| C  | -4.18416500 | -1.00837500 | -0.08849200 |
| C  | -4.32274200 | 0.33802800  | -0.16496100 |
| C  | -2.99375000 | 0.89094900  | -0.24068700 |
| C  | -2.74889200 | 2.25862600  | -0.27207000 |
| C  | -1.45839300 | 2.77410000  | -0.24034300 |
| C  | -1.17942100 | 4.18748300  | -0.19249000 |
| C  | 0.16617500  | 4.31847400  | -0.09029500 |
| C  | 0.71866300  | 2.98796700  | -0.12186500 |
| C  | 2.08400500  | 2.73466400  | -0.07316900 |
| C  | 2.59612600  | 1.44726800  | -0.17921000 |
| C  | 4.01016500  | 1.17270700  | -0.22509900 |
| C  | 4.14454600  | -0.16905300 | -0.37015000 |
| C  | 2.81245100  | -0.71801400 | -0.41586100 |
| C  | 2.56597700  | -2.08436100 | -0.48443500 |
| H  | 1.76464800  | -4.77510600 | -0.45428600 |
| H  | -0.93358700 | -5.04933300 | -0.19325700 |
| H  | -4.94017500 | -1.77008000 | 0.00161500  |
| H  | -5.21892900 | 0.93473400  | -0.18710300 |
| H  | -1.94150400 | 4.94828500  | -0.19557300 |
| H  | 0.76506000  | 5.21132600  | -0.02957300 |
| H  | 4.76960200  | 1.93059300  | -0.13223100 |
| H  | 5.03793800  | -0.76389500 | -0.45847000 |
| C  | 3.02877700  | 3.86726000  | 0.07186100  |
| C  | 3.10214000  | 4.88188700  | -0.90873300 |
| C  | 3.88410000  | 3.94085400  | 1.20216200  |
| C  | 3.98940100  | 5.95819800  | -0.77134200 |
| H  | 2.46861500  | 4.80752100  | -1.80143400 |
| C  | 4.78298800  | 4.99693500  | 1.34081700  |

|   |             |             |             |
|---|-------------|-------------|-------------|
| H | 3.81497100  | 3.16371500  | 1.97396300  |
| C | 4.84243100  | 6.02356200  | 0.35758200  |
| H | 4.02296000  | 6.72426500  | -1.54921800 |
| H | 5.44417800  | 5.06357700  | 2.21165400  |
| C | -3.90104000 | 3.19097500  | -0.29503000 |
| C | -4.11360900 | 4.10861300  | 0.76726400  |
| C | -4.81088500 | 3.17459900  | -1.37561500 |
| C | -5.19212300 | 4.99083600  | 0.73416400  |
| H | -3.43056900 | 4.09991800  | 1.62575500  |
| C | -5.90908900 | 4.04459300  | -1.41164000 |
| H | -4.63759400 | 2.47914400  | -2.20660600 |
| C | -6.10611600 | 4.96814400  | -0.35606700 |
| H | -5.36480800 | 5.70022400  | 1.55081500  |
| H | -6.59096600 | 4.00795800  | -2.26415400 |
| C | -3.19026500 | -3.71582400 | 0.04404100  |
| C | -3.30293600 | -4.68765000 | -0.97551500 |
| C | -3.99232300 | -3.84512200 | 1.20777200  |
| C | -4.17743100 | -5.77514300 | -0.84539400 |
| H | -2.71004400 | -4.57058500 | -1.89122100 |
| C | -4.87830300 | -4.91265600 | 1.34093700  |
| H | -3.89269800 | -3.10233800 | 2.00929900  |
| C | -4.97772400 | -5.89570800 | 0.31720000  |
| H | -4.24212800 | -6.50696800 | -1.65367800 |
| H | -5.49833700 | -5.02206000 | 2.23734800  |
| C | 3.71662400  | -3.01514700 | -0.56222200 |
| C | 3.96499200  | -3.94092300 | 0.48521700  |
| C | 4.59115700  | -2.98503900 | -1.67092200 |
| C | 5.04435700  | -4.81926600 | 0.40998800  |
| H | 3.30988600  | -3.94041900 | 1.36572800  |
| C | 5.69003500  | -3.85152900 | -1.74939500 |
| H | 4.38963500  | -2.28208700 | -2.48897900 |
| C | 5.92278200  | -4.78395100 | -0.70887500 |
| H | 5.24537200  | -5.53484500 | 1.21468100  |
| H | 6.34473000  | -3.80511400 | -2.62248100 |
| O | 6.97231700  | -5.71915300 | -0.65097700 |
| O | 5.78563100  | 7.03175600  | 0.62890000  |
| O | -7.15047200 | 5.90562000  | -0.25634100 |
| O | -5.90238800 | -6.92123000 | 0.58668500  |
| C | 7.86310600  | -5.65097500 | -1.81176200 |
| H | 8.35783200  | -4.66358100 | -1.89991500 |
| H | 8.63283300  | -6.42396600 | -1.64046500 |
| H | 7.33226600  | -5.87512600 | -2.75806900 |
| C | -5.97541900 | -7.92029900 | -0.48204900 |
| H | -5.00597400 | -8.43270700 | -0.64033200 |

|   |             |             |             |
|---|-------------|-------------|-------------|
| H | -6.72197000 | -8.66080400 | -0.14491000 |
| H | -6.31275800 | -7.48035100 | -1.44131900 |
| C | -8.07783300 | 5.85019200  | -1.38883700 |
| H | -8.57774600 | 4.86482800  | -1.47014400 |
| H | -8.83964200 | 6.62345000  | -1.18622600 |
| H | -7.57666200 | 6.08166000  | -2.34944900 |
| C | 5.81653600  | 8.07637700  | -0.39742200 |
| H | 6.58221900  | 8.79818900  | -0.06265600 |
| H | 6.10737000  | 7.67751200  | -1.38933400 |
| H | 4.84418200  | 8.59942500  | -0.48907800 |
| H | 2.91446800  | 0.18926500  | 4.22415100  |
| H | 3.65186400  | -0.18646400 | 2.56046600  |
| C | 2.83498000  | -0.31576100 | 3.26386300  |
| C | 1.76514200  | -1.04839800 | 2.94612100  |
| H | 1.71742200  | -1.52724700 | 1.97187600  |
| C | 0.60391500  | -1.24514600 | 3.81023500  |
| H | 0.64777200  | -0.79778500 | 4.80323400  |
| C | -0.48550800 | -1.91813200 | 3.42923700  |
| H | -0.55807800 | -2.35513000 | 2.43628300  |
| H | -1.33932800 | -2.03651000 | 4.08888400  |
| H | -0.07169700 | 0.06640000  | 1.20864300  |

**TS-HAT'**

SCRF in THF: -3910.180690 Hartree

Lowest frequency: -1743.73 cm<sup>-1</sup>

Gibbs energy in THF: -3909.402062 Hartree

Charge: 0 Multiplicity: 1

|    |             |             |             |
|----|-------------|-------------|-------------|
| Co | -0.11172600 | 0.43535700  | -0.41186000 |
| N  | -0.36630800 | -1.35186900 | -1.22576200 |
| N  | -1.98008000 | 0.38889800  | 0.25323200  |
| N  | 0.09591600  | 2.26712900  | 0.30633300  |
| N  | 1.70725100  | 0.53269500  | -1.18047300 |
| C  | 0.58651600  | -2.10938700 | -1.87186300 |
| C  | 0.05815400  | -3.40686000 | -2.21349900 |
| C  | -1.21424400 | -3.44544600 | -1.74981800 |
| C  | -1.47814800 | -2.16275000 | -1.14347500 |
| C  | -2.67695200 | -1.85967700 | -0.50517300 |
| C  | -2.88632400 | -0.64436300 | 0.13684100  |
| C  | -4.11745100 | -0.31678200 | 0.81247300  |
| C  | -3.94774200 | 0.90972500  | 1.36603900  |
| C  | -2.62023400 | 1.34705200  | 1.01168800  |
| C  | -2.09366600 | 2.56896600  | 1.41791400  |
| C  | -0.81126700 | 2.97646100  | 1.06496400  |
| C  | -0.26768600 | 4.25906400  | 1.43866900  |
| C  | 0.98245300  | 4.32204600  | 0.91737200  |
| C  | 1.20273700  | 3.08468600  | 0.21019000  |
| C  | 2.39471100  | 2.79101400  | -0.44322500 |
| C  | 2.60558500  | 1.57460200  | -1.08418500 |
| C  | 3.84287900  | 1.24000200  | -1.74541700 |
| C  | 3.70795800  | -0.02577600 | -2.21282300 |
| C  | 2.37621500  | -0.45804300 | -1.86806800 |
| C  | 1.88201600  | -1.71701900 | -2.19100400 |
| H  | 0.62824700  | -4.17298100 | -2.71144100 |
| H  | -1.93445900 | -4.24330900 | -1.80171200 |
| H  | -4.97188900 | -0.97119000 | 0.85954300  |
| H  | -4.63937700 | 1.50284600  | 1.94010000  |
| H  | -0.79412300 | 4.97846200  | 2.04315100  |
| H  | 1.70439900  | 5.11987200  | 0.96372400  |
| H  | 4.69335400  | 1.89902400  | -1.79378100 |
| H  | 4.40786800  | -0.62969600 | -2.76528800 |
| C  | 3.47938500  | 3.80216000  | -0.44459700 |
| C  | 3.27897300  | 5.06559000  | -1.04424300 |
| C  | 4.73529800  | 3.51920900  | 0.15324800  |
| C  | 4.29198500  | 6.03424400  | -1.05112400 |
| H  | 2.31738900  | 5.27793100  | -1.52839300 |
| C  | 5.75676100  | 4.46752100  | 0.13689200  |

|   |             |             |             |
|---|-------------|-------------|-------------|
| H | 4.88622400  | 2.55075500  | 0.64597600  |
| C | 5.54633500  | 5.74017100  | -0.46312700 |
| H | 4.10350500  | 6.99941300  | -1.52645200 |
| H | 6.72785700  | 4.25756100  | 0.59820900  |
| C | -2.92930400 | 3.47390800  | 2.24359700  |
| C | -2.51409500 | 3.85147000  | 3.54724500  |
| C | -4.14923600 | 3.98148800  | 1.74284600  |
| C | -3.29339000 | 4.71392100  | 4.31657900  |
| H | -1.57906900 | 3.44198900  | 3.94934700  |
| C | -4.95087000 | 4.83439900  | 2.51382700  |
| H | -4.45733400 | 3.71646200  | 0.72370100  |
| C | -4.52586600 | 5.21283800  | 3.81073400  |
| H | -2.98082500 | 5.00788300  | 5.32446300  |
| H | -5.88660200 | 5.21049900  | 2.09427600  |
| C | -3.70654100 | -2.92177300 | -0.41012000 |
| C | -4.25307700 | -3.51749600 | -1.56801200 |
| C | -4.09893800 | -3.42190200 | 0.86328000  |
| C | -5.13158500 | -4.60791200 | -1.47992900 |
| H | -3.98892700 | -3.10933100 | -2.55137700 |
| C | -4.97374100 | -4.50512700 | 0.96457000  |
| H | -3.70282500 | -2.95148500 | 1.77185700  |
| C | -5.49354200 | -5.11929200 | -0.20976400 |
| H | -5.53406600 | -5.04264400 | -2.39782000 |
| H | -5.27233800 | -4.89725400 | 1.94310600  |
| C | 2.76258200  | -2.67377700 | -2.90463300 |
| C | 3.12261500  | -3.90763300 | -2.30293800 |
| C | 3.25215400  | -2.37590800 | -4.19588000 |
| C | 3.93842300  | -4.81360700 | -2.97879800 |
| H | 2.76356600  | -4.13228700 | -1.29087800 |
| C | 4.08901600  | -3.27007900 | -4.87783700 |
| H | 2.95091900  | -1.43622800 | -4.67552900 |
| C | 4.43668200  | -4.50332000 | -4.27461700 |
| H | 4.22236200  | -5.76710800 | -2.52039500 |
| H | 4.44763500  | -3.00901000 | -5.87598500 |
| O | 5.25495300  | -5.50170000 | -4.83544100 |
| O | 6.65754500  | 6.60146600  | -0.40036900 |
| O | -5.21360000 | 6.06409700  | 4.69552500  |
| O | -6.35248600 | -6.20556800 | 0.03556400  |
| C | 5.75511400  | -5.14882000 | -6.16605500 |
| H | 6.38093600  | -4.23476200 | -6.14732200 |
| H | 6.37757500  | -6.00330000 | -6.48505500 |
| H | 4.93388700  | -5.00939400 | -6.89662000 |
| C | -6.86046700 | -6.82057300 | -1.19323500 |
| H | -6.04423800 | -7.22031900 | -1.82676000 |

|   |             |             |             |
|---|-------------|-------------|-------------|
| H | -7.50153500 | -7.65676500 | -0.86291400 |
| H | -7.46979900 | -6.11422400 | -1.79103200 |
| C | -6.47941400 | 6.55573600  | 4.14658600  |
| H | -7.18601600 | 5.73152200  | 3.92550900  |
| H | -6.91322000 | 7.19920500  | 4.93215600  |
| H | -6.32964800 | 7.15902300  | 3.22943000  |
| C | 6.40588500  | 7.90415900  | -1.02083900 |
| H | 7.34306100  | 8.47571300  | -0.90085300 |
| H | 6.17526500  | 7.81389600  | -2.10076200 |
| H | 5.58336000  | 8.45232100  | -0.52037000 |
| H | -0.18177900 | -0.30468700 | 2.66506300  |
| H | 1.63892600  | -0.41504500 | 2.37861400  |
| C | 0.66115300  | -0.87699200 | 2.28451800  |
| C | 0.53771000  | -2.22028700 | 2.06982600  |
| H | 1.41769800  | -2.80295200 | 1.80383300  |
| C | -0.74427200 | -2.87887400 | 2.00520200  |
| H | -1.60580900 | -2.25054200 | 2.22911300  |
| C | -0.94748700 | -4.14673500 | 1.61714400  |
| H | -0.12029200 | -4.79765800 | 1.34743200  |
| H | -1.95667000 | -4.52320700 | 1.48428800  |
| H | 0.39935700  | -0.20837900 | 0.82898400  |

**Co(Por)(allyl)'**

SCRF in THF: -3910.232132 Hartree

Lowest frequency: 8.19 cm-1

Gibbs energy in THF: -3909.445948 Hartree

Charge: 0 Multiplicity: 1

|    |             |             |             |
|----|-------------|-------------|-------------|
| Co | -0.12997300 | 0.00404000  | -0.12984000 |
| N  | 1.76114600  | 0.58429900  | -0.37454400 |
| N  | 0.43332400  | -1.88693900 | -0.30585600 |
| N  | -2.03471700 | -0.56494200 | -0.13600500 |
| N  | -0.70592800 | 1.90631200  | -0.16131400 |
| H  | 1.58195600  | 1.13665000  | 2.44619900  |
| C  | 2.24110100  | 1.87662300  | -0.38140800 |
| C  | 3.68377000  | 1.88030100  | -0.38966400 |
| C  | 4.07773600  | 0.58414800  | -0.34089100 |
| C  | 2.87749600  | -0.21868900 | -0.35109000 |
| C  | 2.88996000  | -1.61084800 | -0.29516200 |
| C  | 1.72168600  | -2.36861800 | -0.31320500 |
| C  | 1.72144400  | -3.81119400 | -0.35514300 |
| C  | 0.42326200  | -4.20392600 | -0.35696700 |
| C  | -0.37570700 | -3.00355200 | -0.32205200 |
| C  | -1.76541400 | -3.02045400 | -0.26051600 |
| C  | -2.52029900 | -1.85404400 | -0.16232100 |
| C  | -3.95908600 | -1.85444900 | -0.06593700 |
| C  | -4.34451000 | -0.55918300 | 0.05341600  |
| C  | -3.14554200 | 0.24017900  | -0.00413600 |
| C  | -3.15496700 | 1.63109700  | 0.06407300  |
| C  | -1.99092100 | 2.38869000  | -0.02605500 |
| C  | -1.99195400 | 3.83115000  | -0.02565800 |
| C  | -0.69940900 | 4.22421300  | -0.14642600 |
| C  | 0.09536300  | 3.02375600  | -0.23463200 |
| C  | 1.48410400  | 3.04194100  | -0.33659100 |
| H  | 4.28088900  | 2.77660800  | -0.38501500 |
| H  | 5.07343600  | 0.17633500  | -0.31601500 |
| H  | 2.61325000  | -4.41516600 | -0.36549100 |
| H  | 0.00984500  | -5.19745600 | -0.39820900 |
| H  | -4.55844900 | -2.74930700 | -0.05863700 |
| H  | -5.33561200 | -0.14748000 | 0.14193400  |
| H  | -2.88153900 | 4.42923600  | 0.07960900  |
| H  | -0.28855800 | 5.21832500  | -0.19921100 |
| C  | -4.45172400 | 2.33440100  | 0.21254400  |
| C  | -5.45592100 | 2.20740700  | -0.77354200 |
| C  | -4.70202700 | 3.15404000  | 1.34385400  |
| C  | -6.68788400 | 2.86249700  | -0.64230400 |
| H  | -5.25244000 | 1.60151100  | -1.66542100 |

|   |             |             |             |
|---|-------------|-------------|-------------|
| C | -5.91656300 | 3.82494400  | 1.47696200  |
| H | -3.93364200 | 3.23890300  | 2.12240200  |
| C | -6.92839800 | 3.68273500  | 0.48708000  |
| H | -7.44062500 | 2.74439000  | -1.42491800 |
| H | -6.11867900 | 4.45644700  | 2.34891500  |
| C | -2.46474600 | -4.32776500 | -0.27891500 |
| C | -3.26435900 | -4.73849700 | 0.81963500  |
| C | -2.34282600 | -5.18783300 | -1.39315300 |
| C | -3.92805300 | -5.96396700 | 0.79260600  |
| H | -3.33781100 | -4.08803800 | 1.70005000  |
| C | -2.99031400 | -6.43047100 | -1.42440600 |
| H | -1.74517900 | -4.86178300 | -2.25364500 |
| C | -3.79600000 | -6.82833100 | -0.32969200 |
| H | -4.54473100 | -6.28926700 | 1.63748900  |
| H | -2.87659200 | -7.06883200 | -2.30335000 |
| C | 4.19213700  | -2.30494100 | -0.16516500 |
| C | 5.22099900  | -2.12213700 | -1.11714100 |
| C | 4.44307900  | -3.14178300 | 0.95803600  |
| C | 6.48200300  | -2.70974100 | -0.94573000 |
| H | 5.01656100  | -1.52487800 | -2.01414800 |
| C | 5.69385600  | -3.73742800 | 1.13564000  |
| H | 3.64023700  | -3.31701000 | 1.68442500  |
| C | 6.73390500  | -3.51823100 | 0.19092300  |
| H | 7.25236300  | -2.54699800 | -1.70311900 |
| H | 5.89382400  | -4.37606000 | 2.00310300  |
| C | 2.17816900  | 4.35283600  | -0.36556000 |
| C | 3.06992000  | 4.72411900  | 0.67429000  |
| C | 1.95651200  | 5.25550200  | -1.42913700 |
| C | 3.72756500  | 5.95270900  | 0.63749900  |
| H | 3.22086000  | 4.03973600  | 1.51843000  |
| C | 2.59682800  | 6.50180100  | -1.46764900 |
| H | 1.28417400  | 4.96140200  | -2.24486100 |
| C | 3.49583000  | 6.85981800  | -0.43363000 |
| H | 4.41579900  | 6.24748300  | 1.43710200  |
| H | 2.40419900  | 7.17446100  | -2.30636300 |
| O | 4.21672500  | 8.06484800  | -0.33902500 |
| O | -8.10565000 | 4.40611700  | 0.75331900  |
| O | -4.51138400 | -8.03508300 | -0.21935300 |
| O | 7.94408200  | -4.16563500 | 0.49851300  |
| C | 3.94827700  | 8.97929900  | -1.45124400 |
| H | 2.88244400  | 9.27830800  | -1.49706700 |
| H | 4.56392700  | 9.87457400  | -1.25423100 |
| H | 4.24436300  | 8.54669900  | -2.42734500 |
| C | 8.99559500  | -3.91080000 | -0.48922200 |



|   |             |             |             |
|---|-------------|-------------|-------------|
| H | 9.24241000  | -2.83350600 | -0.56598100 |
| H | 9.88297900  | -4.45769500 | -0.12486800 |
| H | 8.72488200  | -4.29263700 | -1.49345800 |
| C | -4.34729700 | -8.90488200 | -1.38640300 |
| H | -3.29125000 | -9.20343600 | -1.53845500 |
| H | -4.94762400 | -9.80631700 | -1.17107200 |
| H | -4.72658900 | -8.43312200 | -2.31437900 |
| C | -9.12902300 | 4.23179100  | -0.28002700 |
| H | -9.99047400 | 4.83838000  | 0.05058200  |
| H | -8.78938900 | 4.59818600  | -1.26895200 |
| H | -9.44836200 | 3.17526900  | -0.37626700 |
| H | -0.53063300 | -1.11658600 | 2.15593900  |
| H | -0.84205200 | 0.68617500  | 2.17946600  |
| C | -0.12627000 | -0.11563100 | 2.01391100  |
| C | 1.22777100  | 0.10541100  | 2.44863300  |
| C | 2.10458100  | -0.87214300 | 2.76769400  |
| H | 1.75484200  | -1.90478900 | 2.74320100  |
| C | 3.54601900  | -0.65010200 | 3.10614600  |
| H | 3.77138500  | -0.94993100 | 4.13794700  |
| H | 4.18599000  | -1.25219000 | 2.45059500  |
| H | 3.82338400  | 0.40062600  | 2.98213300  |

## 6. Mechanistic studies

### Radical capture experiments

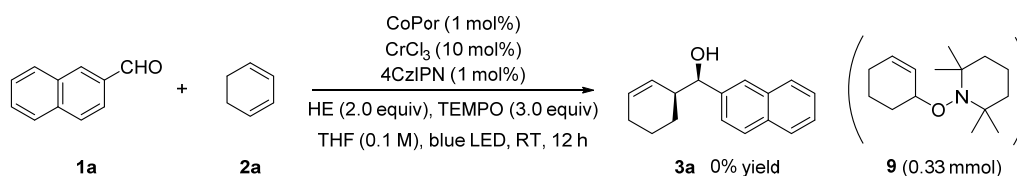

An oven-dried Schlenk tube containing a stir bar was charged with TEMPO (234 mg, 1.5 mmol, 3.0 equiv.), CoPor (4.0 mg, 0.005 mmol, 1 mol%), 4CzIPN (4.0 mg, 0.005 mmol, 1.0 mol%) and HE (253.3 mg, 1.0 mmol, 2.0 equiv.), CrCl<sub>3</sub> (7.9 mg, 0.05 mmol, 10 mol%) in THF (5 mL, 0.1 M) under argon. Then, **1a** (78.1 mg, 0.5 mmol, 1.0 equiv.), **2a** (1.0 mmol, 2.0 equiv.) was added. The reaction was stirred at room temperature under 450 nm LED irradiation for 12 h. Then the reaction mixture was concentrated in vacuo, the product **3a** could not be detected by <sup>1</sup>H NMR analysis, 0.33 mmol allyl radical adduct **9** was detected and confirmed by HRMS and NMR spectra, indicating that radical intermediate may be involved in the reaction.

**<sup>1</sup>H NMR (400 MHz, CDCl<sub>3</sub>):** δ 5.97 – 5.88 (m, 1H), 5.79 (dd, *J* = 10.2, 3.4 Hz, 1H), 4.23 (s, 1H), 2.03 (d, *J* = 18.2 Hz, 1H), 1.90 (ddd, *J* = 16.3, 7.3, 3.6 Hz, 2H), 1.81 – 1.70 (m, 2H), 1.62 – 1.42 (m, 6H), 1.32 (m, 1H), 1.14 (m, 12H).

**<sup>13</sup>C NMR (101 MHz, CDCl<sub>3</sub>):** δ 129.97, 128.98, 77.49, 60.05, 59.28, 40.23, 34.62, 34.26, 29.48, 25.33, 20.32, 20.21, 19.70, 17.24.

**HRMS (ESI) [M+H]<sup>+</sup>** calculated for C<sub>18</sub>H<sub>29</sub>N<sub>2</sub>O<sub>3</sub><sup>+</sup>: 238.2165, found: 238.2158.

## 7. Characterization of products

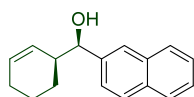

**3a**,  $R_f = 0.7$  (EA:PE=1:4), column solvent: hexane/EtOAc = 10:1, 94% (111.9 mg), colorless oil.

**$^1\text{H NMR}$  (400 MHz,  $\text{CDCl}_3$ ):**  $\delta$  7.86 – 7.82 (m, 3H), 7.80 (s, 1H), 7.53 – 7.43 (m, 3H), 5.89 – 5.75 (m, 1H), 5.46 – 5.38 (m, 1H), 4.76 (d,  $J = 6.5$  Hz, 1H), 2.66 – 2.53 (m, 1H), 2.07 – 1.96 (m, 2H), 1.88 (s, 1H), 1.83 – 1.66 (m, 2H), 1.64 – 1.45 (m, 2H).

**$^{13}\text{C NMR}$  (101 MHz,  $\text{CDCl}_3$ ):**  $\delta$  140.26, 133.14, 132.88, 130.53, 127.96, 127.94, 127.93, 127.63, 126.03, 125.71, 125.32, 124.52, 77.43, 42.87, 25.20, 23.82, 21.09.

**HRMS (ESI)  $[\text{M-OH}]^+$**  calculated for  $\text{C}_{17}\text{H}_{17}^+$ : 221.1325, found: 221.1320.

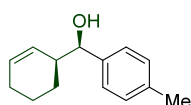

**3b**,  $R_f = 0.7$  (EA:PE=1:4), column solvent: hexane/EtOAc = 10:1, 78% (78.8 mg), colorless oil.

**$^1\text{H NMR}$  (400 MHz,  $\text{CDCl}_3$ ):**  $\delta$  7.23 (d,  $J = 8.1$  Hz, 2H), 7.16 (d,  $J = 7.9$  Hz, 2H), 5.87 – 5.70 (m, 1H), 5.41 – 5.30 (m, 1H), 4.53 (d,  $J = 6.7$  Hz, 1H), 2.53 – 2.43 (m, 1H), 2.35 (s, 3H), 2.02 – 1.95 (m, 2H), 1.88 (s, 1H), 1.75 (dd,  $J = 14.3, 4.1$  Hz, 2H), 1.55 – 1.47 (m, 2H).

**$^{13}\text{C NMR}$  (101 MHz,  $\text{CDCl}_3$ ):**  $\delta$  139.89, 136.99, 130.13, 128.87, 128.06, 126.43, 77.30, 42.90, 25.20, 24.00, 21.09, 21.08.

**HRMS (ESI)  $[\text{M-OH}]^+$**  calculated for  $\text{C}_{14}\text{H}_{17}^+$ : 185.1325, found: 185.1321.

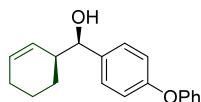

**3c**,  $R_f = 0.5$  (EA:PE=1:4), column solvent: hexane/EtOAc = 10:1, 83% (116.2 mg), colorless oil.

**$^1\text{H NMR}$  (400 MHz,  $\text{CDCl}_3$ ):**  $\delta$  7.38 – 7.28 (m, 2H), 7.11 (t,  $J = 7.4$  Hz, 1H), 7.01 (t,  $J = 8.6$  Hz, 2H), 5.83 (dq,  $J = 9.8, 3.4$  Hz, 1H), 5.45 – 5.36 (m, 1H), 4.56 (d,  $J = 6.7$  Hz, 1H), 2.53 – 2.45 (m, 1H), 2.05 – 1.93 (m, 4H), 1.76 (dt,  $J = 8.1, 3.7$  Hz, 2H), 1.53 (dd,  $J = 11.8, 5.3$  Hz, 1H).

**$^{13}\text{C NMR}$  (101 MHz,  $\text{CDCl}_3$ ):**  $\delta$  157.21, 156.43, 137.73, 130.38, 129.68, 127.89, 127.84, 123.16, 118.78, 118.55, 76.95, 42.99, 25.20, 23.97, 21.04.

**HRMS (ESI)  $[\text{M-OH}]^+$**  calculated for  $\text{C}_{19}\text{H}_{19}\text{O}^+$ : 263.1430, found: 263.1432.

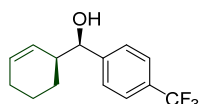

**3d**,  $R_f = 0.6$  (EA:PE=1:4), column solvent: hexane/EtOAc = 10:1, 62% (73.4 mg), colorless oil.

**$^1\text{H NMR}$  (400 MHz,  $\text{CDCl}_3$ ):**  $\delta$  7.60 (d,  $J = 8.0$  Hz, 2H), 7.46 (d,  $J = 8.1$  Hz, 2H), 5.92 – 5.84 (m, 1H), 5.41 (dd,  $J = 10.2, 2.5$  Hz, 1H), 4.69 (d,  $J = 5.8$  Hz, 1H), 2.51 (dq,  $J = 5.4, 2.7$  Hz, 1H), 2.04 – 1.96 (m, 3H), 1.78 – 1.71 (m, 1H), 1.64 – 1.46 (m, 3H).

**<sup>13</sup>C NMR (101 MHz, CDCl<sub>3</sub>):** δ 146.71, 131.33, 129.48 (d, J = 32.3 Hz), 127.41, 126.70, 125.08 (q, J = 3.8 Hz), 124.19 (d, J = 272.7 Hz), 76.50, 43.01, 25.12, 23.20, 21.01.

**HRMS (ESI) [M-OH]<sup>+</sup>** calculated for C<sub>14</sub>H<sub>14</sub>F<sub>3</sub><sup>+</sup>: 239.1042, found: 239.1037

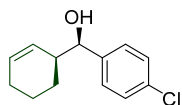

**3e**, R<sub>f</sub> = 0.7 (EA:PE=1:4), column solvent: hexane/EtOAc = 10:1, 79% (87.7 mg), colorless oil.

**<sup>1</sup>H NMR (400 MHz, CDCl<sub>3</sub>):** δ 7.31 (d, J = 8.6 Hz, 2H), 7.27 (d, J = 9.0 Hz, 2H), 5.87 – 5.79 (m, 1H), 5.41 – 5.35 (m, 1H), 4.59 (d, J = 6.2 Hz, 1H), 2.46 (dq, J = 6.0, 2.9 Hz, 1H), 2.03 – 1.94 (m, 2H), 1.78 – 1.70 (m, 2H), 1.68 – 1.60 (m, 1H), 1.53 – 1.45 (m, 2H).

**<sup>13</sup>C NMR (101 MHz, CDCl<sub>3</sub>):** δ 141.24, 132.96, 130.90, 128.30, 127.83, 127.56, 76.58, 42.99, 25.16, 23.55, 21.03.

**HRMS (ESI) [M-OH]<sup>+</sup>** calculated for C<sub>13</sub>H<sub>14</sub>Cl<sup>+</sup>: 205.0779, found: 205.0777

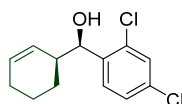

**3f**, R<sub>f</sub> = 0.6 (EA:PE=1:4), column solvent: hexane/EtOAc = 10:1, 76% (97.7 mg), colorless oil.

**<sup>1</sup>H NMR (400 MHz, CDCl<sub>3</sub>):** δ 7.51 (d, J = 8.4 Hz, 1H), 7.36 (d, J = 2.1 Hz, 1H), 7.27 (dd, J = 8.4, 2.1 Hz, 1H), 5.97 – 5.88 (m, 1H), 5.54 – 5.47 (m, 1H), 5.07 (d, J = 4.9 Hz, 1H), 2.68 – 2.61 (m, 1H), 2.09 – 1.99 (m, 3H), 1.82 – 1.73 (m, 1H), 1.56 – 1.46 (m, 3H).

**<sup>13</sup>C NMR (101 MHz, CDCl<sub>3</sub>):** δ 138.52, 133.25, 132.51, 131.45, 129.16, 128.97, 127.62, 126.93, 72.70, 40.70, 25.06, 22.67, 21.21.

**HRMS (ESI) [M-OH]<sup>+</sup>** calculated for C<sub>13</sub>H<sub>13</sub>Cl<sub>2</sub><sup>+</sup>: 239.0382, found: 239.0384

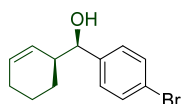

**3g**, R<sub>f</sub> = 0.7 (EA:PE=1:4), column solvent: hexane/EtOAc = 10:1, 95% (126.4 mg), colorless oil.

**<sup>1</sup>H NMR (400 MHz, CDCl<sub>3</sub>):** δ 7.48 – 7.44 (m, 2H), 7.23 – 7.19 (m, 2H), 5.84 (dq, J = 9.9, 3.5 Hz, 1H), 5.38 (dd, J = 10.2, 1.9 Hz, 1H), 4.57 (d, J = 6.2 Hz, 1H), 2.46 (dq, J = 5.7, 3.0 Hz, 1H), 2.01 – 1.94 (m, 2H), 1.82 (s, 1H), 1.78 – 1.70 (m, 1H), 1.68 – 1.60 (m, 1H), 1.52 – 1.45 (m, 2H).

**<sup>13</sup>C NMR (101 MHz, CDCl<sub>3</sub>):** δ 141.77, 131.25, 130.93, 128.19, 127.54, 121.08, 76.60, 42.95, 25.16, 23.52, 21.02.

**HRMS (ESI) [M-OH]<sup>+</sup>** calculated for C<sub>13</sub>H<sub>14</sub>Br<sup>+</sup>: 249.0273, found: 249.0270

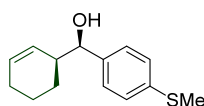

**3h**,  $R_f = 0.5$  (EA:PE=1:4), column solvent: hexane/EtOAc = 10:1, 90% (105.3 mg), colorless oil.

**$^1\text{H NMR}$  (400 MHz,  $\text{CDCl}_3$ ):**  $\delta$  7.32 – 7.18 (m, 4H), 5.81 (m, 1H), 5.37 (m, 1H), 4.53 (d,  $J = 6.6$  Hz, 1H), 2.48 (m, 4H), 1.98 (m, 2H), 1.93 (s, 1H), 1.78 – 1.68 (m, 2H), 1.50 (m, 2H).

**$^{13}\text{C NMR}$  (101 MHz,  $\text{CDCl}_3$ ):**  $\delta$  139.81, 137.24, 130.42, 127.81, 127.03, 126.45, 76.96, 42.91, 25.17, 23.85, 21.04, 15.90.

**HRMS (ESI) [M-OH] $^+$**  calculated for  $\text{C}_{14}\text{H}_{17}\text{S}^+$ : 217.1045, found: 217.1049.

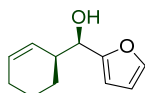

**3i**,  $R_f = 0.6$  (EA:PE=1:4), column solvent: hexane/EtOAc = 10:1, 60% (53.5 mg), colorless oil.

**$^1\text{H NMR}$  (400 MHz,  $\text{CDCl}_3$ ):**  $\delta$  7.38 – 7.37 (m, 1H), 6.34 (dd,  $J = 3.2, 1.8$  Hz, 1H), 6.26 (d,  $J = 3.2$  Hz, 1H), 5.84 – 5.74 (m, 1H), 5.42 – 5.33 (m, 1H), 4.53 (d,  $J = 7.4$  Hz, 1H), 2.74 – 2.52 (m, 1H), 2.02 – 1.95 (m, 3H), 1.87 – 1.73 (m, 2H), 1.59 – 1.50 (m, 2H).

**$^{13}\text{C NMR}$  (101 MHz,  $\text{CDCl}_3$ ):**  $\delta$  155.57, 141.77, 130.10, 127.17, 110.08, 106.76, 71.25, 40.69, 25.15, 24.42, 20.91.

**HRMS (ESI) [M-OH] $^+$**  calculated for  $\text{C}_{11}\text{H}_{13}\text{O}^+$ : 161.0960, found: 161.0961.

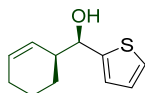

**3j**,  $R_f = 0.6$  (EA:PE=1:4), column solvent: hexane/EtOAc = 10:1, 55% (53.4 mg), colorless oil.

**$^1\text{H NMR}$  (400 MHz,  $\text{CDCl}_3$ ):**  $\delta$  7.27 – 7.24 (m, 1H), 6.99 – 6.96 (m, 2H), 5.83 (dq,  $J = 10.0, 3.5$  Hz, 1H), 5.51 – 5.40 (m, 1H), 4.81 (d,  $J = 7.0$  Hz, 1H), 2.57 (dd,  $J = 9.5, 5.1$  Hz, 1H), 2.03 – 1.97 (m, 3H), 1.90 – 1.81 (m, 1H), 1.81 – 1.71 (m, 1H), 1.60 – 1.46 (m, 2H).

**$^{13}\text{C NMR}$  (101 MHz,  $\text{CDCl}_3$ ):**  $\delta$  146.77, 130.51, 127.34, 126.45, 124.61, 124.44, 73.69, 43.44, 25.20, 24.45, 21.02.

**HRMS (ESI) [M-OH] $^+$**  calculated for  $\text{C}_{11}\text{H}_{13}\text{S}^+$ : 177.0732, found: 177.0729.

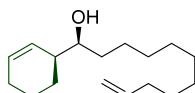

**3k**,  $R_f = 0.6$  (EA:PE=1:4), column solvent: hexane/EtOAc = 10:1, 85% (106.3 mg), colorless oil.

**$^1\text{H NMR}$  (400 MHz,  $\text{CDCl}_3$ ):**  $\delta$  5.92 – 5.74 (m, 2H), 5.59 – 5.51 (m, 1H), 5.04 – 4.95 (m, 1H), 4.92 (d,  $J = 10.1$  Hz, 1H), 3.56 (q,  $J = 5.8, 4.8$  Hz, 1H), 2.20 (s, 1H), 2.10 – 1.94 (m, 4H), 1.74 (m, 2H), 1.49 (m, 5H), 1.40 – 1.23 (m, 12H).

**<sup>13</sup>C NMR (101 MHz, CDCl<sub>3</sub>):** δ 139.19, 130.34, 128.81, 114.07, 74.54, 41.20, 33.77, 29.69, 29.54, 29.42, 29.09, 28.89, 26.08, 25.21, 22.62, 21.42.

**HRMS (ESI) [M-OH]<sup>+</sup>** calculated for C<sub>17</sub>H<sub>29</sub><sup>+</sup>: 233.2264, found: 233.2261.

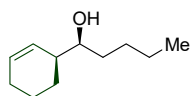

**3l**, R<sub>f</sub> = 0.6 (EA:PE=1:4), column solvent: hexane/EtOAc = 10:1, 87% (73.1 mg), colorless oil.

**<sup>1</sup>H NMR (400 MHz, CDCl<sub>3</sub>):** δ 5.95 – 5.80 (m, 1H), 5.64 – 5.49 (m, 1H), 3.57 (q, J = 5.7, 5.2 Hz, 1H), 2.21 (s, 1H), 2.03 – 1.95 (m, 2H), 1.75 (m, 2H), 1.50 (m, 5H), 1.40 – 1.26 (m, 4H), 0.91 (t, J = 7.0 Hz, 3H).

**<sup>13</sup>C NMR (101 MHz, CDCl<sub>3</sub>):** δ 130.35, 128.83, 74.53, 41.20, 33.47, 28.28, 25.22, 22.77, 22.62, 21.43, 14.05.

**HRMS (ESI) [M-OH]<sup>+</sup>** calculated for C<sub>11</sub>H<sub>19</sub><sup>+</sup>: 151.1481, found: 151.1481.

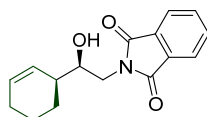

**3m**, R<sub>f</sub> = 0.3 (EA:PE=1:2), column solvent: hexane/EtOAc = 4:1, 88% (119.2 mg), colorless oil.

**<sup>1</sup>H NMR (400 MHz, CDCl<sub>3</sub>):** δ 7.83 (dd, J = 5.3, 3.0 Hz, 2H), 7.70 (dd, J = 5.3, 3.0 Hz, 2H), 5.90 – 5.82 (m, 1H), 5.63 (d, J = 10.1 Hz, 1H), 3.88 – 3.76 (m, 2H), 2.54 (s, 1H), 2.30 (s, 1H), 1.99 (s, 2H), 1.81 (t, J = 11.9 Hz, 4H), 1.65 – 1.49 (m, 2H).

**<sup>13</sup>C NMR (101 MHz, CDCl<sub>3</sub>):** δ 168.92, 134.03, 131.91, 130.54, 127.00, 123.34, 73.13, 42.16, 39.88, 25.08, 23.32, 21.06.

**HRMS (ESI) [M+Na]<sup>+</sup>** calculated for C<sub>16</sub>H<sub>17</sub>NNaO<sub>3</sub><sup>+</sup>: 294.1101, found: 294.1099.

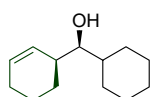

**3n**, R<sub>f</sub> = 0.6 (EA:PE=1:4), column solvent: hexane/EtOAc = 10:1, 86% (83.4 mg), colorless oil.

**<sup>1</sup>H NMR (400 MHz, CDCl<sub>3</sub>):** δ 5.87 (m, 1H), 5.52 – 5.43 (m, 1H), 3.22 (dd, J = 7.4, 4.5 Hz, 1H), 2.40 – 2.28 (m, 1H), 2.02 – 1.92 (m, 3H), 1.72 (m, 3H), 1.68 – 1.61 (m, 2H), 1.61 – 1.38 (m, 5H), 1.29 – 1.09 (m, 3H), 1.06 – 0.91 (m, 2H).

**<sup>13</sup>C NMR (101 MHz, CDCl<sub>3</sub>):** δ 130.69, 129.23, 78.47, 39.69, 37.87, 29.34, 28.66, 26.41, 26.21, 25.94, 25.13, 21.91, 21.28.

**HRMS (ESI) [M-OH]<sup>+</sup>** calculated for C<sub>13</sub>H<sub>21</sub><sup>+</sup>: 177.1638, found: 177.1634.

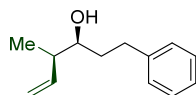

**4a**,  $R_f = 0.6$  (EA/PE = 1:4), column solvent: hexane/EtOAc = 10:1, 77% yield (73.2 mg), colorless oil.

**$^1\text{H NMR}$  (400 MHz,  $\text{CDCl}_3$ ):**  $\delta$  7.30 (t,  $J = 7.4$  Hz, 2H), 7.21 (m, 3H), 5.76 (ddd,  $J = 16.4, 11.1, 8.3$  Hz, 1H), 5.19 – 5.07 (m, 2H), 3.43 (td,  $J = 9.2, 3.8$  Hz, 1H), 2.86 (ddd,  $J = 15.2, 10.2, 5.2$  Hz, 1H), 2.69 (ddd,  $J = 13.7, 9.9, 6.6$  Hz, 1H), 2.24 (h,  $J = 6.8$  Hz, 1H), 1.85 (dddd,  $J = 13.6, 10.1, 6.6, 3.2$  Hz, 1H), 1.72 (ddd,  $J = 14.5, 9.8, 5.0$  Hz, 1H), 1.66 (s, 1H), 1.04 (d,  $J = 6.8$  Hz, 3H).

**$^{13}\text{C NMR}$  (101 MHz,  $\text{CDCl}_3$ ):**  $\delta$  142.27, 140.15, 128.44, 128.34, 125.74, 116.50, 73.94, 44.32, 36.08, 32.13, 16.20.

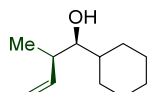

**4b**,  $R_f = 0.7$  (EA:PE=1:4), column solvent: hexane/EtOAc = 10:1, 78% yield (65.5 mg), colorless oil.

**$^1\text{H NMR}$  (400 MHz,  $\text{CDCl}_3$ ):**  $\delta$  5.77 (ddd,  $J = 16.7, 10.9, 8.2$  Hz, 1H), 5.11 (s, 1H), 5.09 – 5.05 (m, 1H), 3.08 (q,  $J = 5.5$  Hz, 1H), 2.36 (m,  $J = 6.8$  Hz, 1H), 1.84 – 1.71 (m, 3H), 1.63 (td,  $J = 12.5, 10.5, 3.1$  Hz, 2H), 1.50 (d,  $J = 4.4$  Hz, 1H), 1.43 – 1.34 (m, 1H), 1.26 – 1.06 (m, 5H), 1.01 (d,  $J = 6.9$  Hz, 3H).

**$^{13}\text{C NMR}$  (101 MHz,  $\text{CDCl}_3$ ):**  $\delta$  140.35, 116.01, 78.79, 40.50, 40.31, 29.96, 27.03, 26.47, 26.41, 26.10, 16.94.

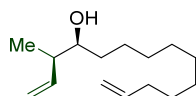

**4c**,  $R_f = 0.7$  (EA:PE = 1:4), column solvent: hexane/EtOAc = 10:1, 71% yield (79.5 mg), colorless oil.

**$^1\text{H NMR}$  (400 MHz,  $\text{CDCl}_3$ ):**  $\delta$  5.89 – 5.68 (m, 2H), 5.12 (s, 1H), 5.11 – 5.06 (m, 1H), 4.98 (dd,  $J = 17.1, 1.7$  Hz, 1H), 4.92 (dd,  $J = 10.7, 1.4$  Hz, 1H), 3.42 – 3.33 (m, 1H), 2.20 (h,  $J = 6.8$  Hz, 1H), 2.03 (q,  $J = 6.9$  Hz, 2H), 1.58 (s, 1H), 1.48 (m, 2H), 1.41 – 1.22 (m, 12H), 1.02 (d,  $J = 6.8$  Hz, 3H).

**$^{13}\text{C NMR}$  (101 MHz,  $\text{CDCl}_3$ ):**  $\delta$  140.35, 139.20, 116.20, 114.07, 74.66, 44.09, 34.21, 33.78, 29.68, 29.54, 29.42, 29.10, 28.89, 25.70, 16.27.

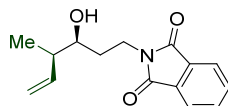

**4d**,  $R_f = 0.3$  (EA:PE=1:4), column solvent: hexane/EtOAc = 10:1, 56% yield (72.5 mg), colorless oil.

**$^1\text{H NMR}$  (400 MHz,  $\text{CDCl}_3$ ):**  $\delta$  7.83 (dd,  $J = 5.4, 3.0$  Hz, 2H), 7.70 (dd,  $J = 5.4, 3.0$  Hz, 2H), 5.75 (ddd,  $J = 16.7, 10.8, 8.1$  Hz, 1H), 5.08 (s, 1H), 5.04 (d,  $J = 8.3$  Hz, 1H), 3.85 (m,  $J = 6.7, 6.0, 2.8$  Hz, 2H), 3.40 (ddd,  $J = 9.9, 5.3, 2.6$  Hz, 1H), 2.49 (s, 1H), 2.21 (m,  $J = 6.8$  Hz, 1H), 1.83 (m,  $J = 15.6, 7.8, 2.7$  Hz, 1H), 1.70 (ddt,  $J = 14.3, 10.5, 5.6$  Hz, 1H), 1.02 (d,  $J = 6.9$  Hz, 3H).

**<sup>13</sup>C NMR (101 MHz, CDCl<sub>3</sub>):** δ 168.74, 139.94, 133.95, 132.05, 123.25, 116.03, 71.81, 43.93, 34.99, 33.20, 16.20.

**HRMS (ESI) [M+H]<sup>+</sup>** calculated for C<sub>15</sub>H<sub>18</sub>NO<sub>3</sub><sup>+</sup>: 260.1281, found: 260.1282.

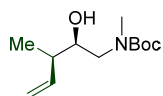

**4e**, R<sub>f</sub> = 0.3 (EA:PE=1:4), column solvent: hexane/EtOAc = 10:1, 76% yield (87.0 mg), colorless oil.

**<sup>1</sup>H NMR (400 MHz, CDCl<sub>3</sub>):** δ 5.80 (dt, J = 18.5, 9.2 Hz, 1H), 5.05 (m, 2H), 3.65 (s, 1H), 3.49 – 2.96 (m, 3H), 2.88 (s, 3H), 2.22 (h, J = 6.9 Hz, 1H), 1.42 (s, 9H), 1.05 (d, J = 6.9 Hz, 3H).

**<sup>13</sup>C NMR (101 MHz, CDCl<sub>3</sub>):** δ 157.59, 139.51, 115.65, 79.91, 73.95, 53.30, 42.26, 35.89, 28.33, 15.81.

**HRMS (ESI) [M+Na]<sup>+</sup>** calculated for C<sub>12</sub>H<sub>23</sub>NNaO<sub>3</sub><sup>+</sup>: 252.1570, found: 252.1571.

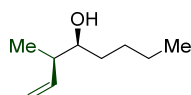

**4f**, R<sub>f</sub> = 0.7 (EA:PE = 1:4), column solvent: hexane/EtOAc = 10:1, 74% yield (52.5 mg), colorless oil.

**<sup>1</sup>H NMR (400 MHz, CDCl<sub>3</sub>):** δ 5.76 (ddd, J = 16.6, 10.9, 8.2 Hz, 1H), 5.13 (s, 1H), 5.11 – 5.08 (m, 1H), 3.39 (m, 1H), 2.21 (m, 1H), 1.54 – 1.47 (m, 2H), 1.42 – 1.26 (m, 5H), 1.03 (d, J = 6.9 Hz, 3H), 0.91 (t, J = 7.1 Hz, 3H).

**<sup>13</sup>C NMR (101 MHz, CDCl<sub>3</sub>):** δ 140.37, 116.24, 74.67, 44.10, 33.91, 27.90, 22.76, 16.29, 14.07.

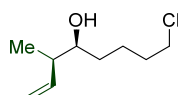

**4g**, R<sub>f</sub> = 0.7 (EA:PE=1:4), column solvent: hexane/EtOAc = 10:1, 82% yield (72.2 mg), colorless oil.

**<sup>1</sup>H NMR (400 MHz, CDCl<sub>3</sub>):** δ 5.74 (ddd, J = 16.9, 10.7, 8.3 Hz, 1H), 5.14 (s, 1H), 5.11 (d, J = 8.3 Hz, 1H), 3.55 (t, J = 6.7 Hz, 2H), 3.39 (ddd, J = 8.9, 6.1, 3.2 Hz, 1H), 2.20 (dq, J = 14.2, 7.0 Hz, 1H), 1.81 (qd, J = 12.0, 11.4, 6.0 Hz, 2H), 1.68 – 1.60 (m, 1H), 1.56 – 1.49 (m, 2H), 1.40 (dd, J = 13.2, 8.7 Hz, 1H), 1.04 (d, J = 6.8 Hz, 3H).

**<sup>13</sup>C NMR (101 MHz, CDCl<sub>3</sub>):** δ 140.13, 116.55, 74.35, 44.98, 44.21, 33.33, 32.61, 23.10, 16.25.

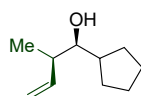

**4h**, R<sub>f</sub> = 0.7 (EA:PE=1:4), column solvent: hexane/EtOAc = 10:1, 45% yield (34.7 mg), colorless oil.



**<sup>1</sup>H NMR (400 MHz, CDCl<sub>3</sub>):** δ 5.82 (ddd, *J* = 17.0, 10.6, 8.2 Hz, 1H), 5.11 (dd, *J* = 2.5, 1.6 Hz, 1H), 5.10 – 5.06 (m, 1H), 3.25 (dt, *J* = 7.4, 4.8 Hz, 1H), 2.30 (m, *J* = 14.0, 7.0 Hz, 1H), 1.95 (m, *J* = 7.7 Hz, 1H), 1.79 – 1.65 (m, 2H), 1.65 – 1.58 (m, 2H), 1.58 – 1.47 (m, 2H), 1.43 (d, *J* = 5.1 Hz, 1H), 1.38 (m, *J* = 12.0, 8.0 Hz, 1H), 1.30 – 1.19 (m, 1H), 1.07 (d, *J* = 6.9 Hz, 3H).

**<sup>13</sup>C NMR (101 MHz, CDCl<sub>3</sub>):** δ 139.81, 115.96, 78.94, 43.68, 42.36, 29.11, 28.32, 25.63, 25.56, 17.23.

**HRMS (ESI) [M+H]<sup>+</sup>** calculated for C<sub>10</sub>H<sub>19</sub>O<sup>+</sup>: 155.1430, found: 155.1428.

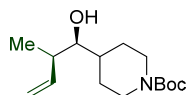

**4i**, R<sub>f</sub> = 0.2 (EA:PE=1:4), column solvent: hexane/EtOAc = 10:1, 85% yield (114.3 mg), colorless oil.

**<sup>1</sup>H NMR (400 MHz, CDCl<sub>3</sub>):** δ 5.77 (ddd, *J* = 17.1, 10.4, 8.3 Hz, 1H), 5.15 – 5.07 (m, 2H), 4.13 (s, 2H), 3.14 (q, *J* = 5.5 Hz, 1H), 2.64 (s, 2H), 2.36 (m, *J* = 6.9 Hz, 1H), 1.80 – 1.70 (m, 1H), 1.61 – 1.48 (m, 2H), 1.44 (s, 9H), 1.30 (dd, *J* = 33.1, 15.3 Hz, 2H), 1.04 (d, *J* = 6.9 Hz, 3H).

**<sup>13</sup>C NMR (101 MHz, CDCl<sub>3</sub>):** δ 154.77, 139.58, 116.58, 79.22, 77.89, 43.73, 40.48, 38.93, 28.43, 26.74, 17.01.

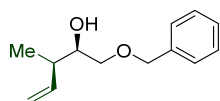

**4j**, R<sub>f</sub> = 0.6 (EA:PE=1:4), column solvent: hexane/EtOAc = 10:1, 80% yield (82.4 mg), colorless oil.

**<sup>1</sup>H NMR (400 MHz, CDCl<sub>3</sub>):** δ 7.41 – 7.27 (m, 5H), 5.90 – 5.76 (m, 1H), 5.10 (d, *J* = 3.8 Hz, 1H), 5.07 (s, 1H), 4.56 (s, 2H), 3.68 (ddd, *J* = 7.6, 6.0, 3.2 Hz, 1H), 3.55 (dd, *J* = 9.6, 3.2 Hz, 1H), 3.43 (dd, *J* = 9.6, 7.6 Hz, 1H), 2.36 (m, 2H), 1.05 (d, *J* = 6.9 Hz, 3H).

**<sup>13</sup>C NMR (101 MHz, CDCl<sub>3</sub>):** δ 140.02, 137.96, 128.39, 127.71, 127.68, 115.52, 73.47, 73.34, 72.47, 40.76, 16.14.

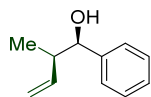

**4k**, R<sub>f</sub> = 0.5 (EA:PE=1:4), column solvent: hexane/EtOAc = 10:1, 45% yield (36.5 mg), colorless oil.

**<sup>1</sup>H NMR (400 MHz, CDCl<sub>3</sub>):** δ 7.46 – 7.21 (m, 5H), 5.82 (ddd, *J* = 17.3, 10.3, 8.2 Hz, 1H), 5.25 – 5.19 (m, 1H), 5.18 (d, *J* = 3.0 Hz, 1H), 4.36 (dd, *J* = 7.9, 2.5 Hz, 1H), 2.49 (h, *J* = 7.0 Hz, 1H), 2.25 (s, 1H), 0.88 (d, *J* = 6.8 Hz, 3H).

**<sup>13</sup>C NMR (101 MHz, CDCl<sub>3</sub>):** δ 142.36, 140.58, 128.15, 127.56, 126.77, 116.72, 77.76, 46.19, 16.45.

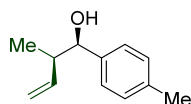

**4l**,  $R_f = 0.5$  (EA:PE=1:4), column solvent: hexane/EtOAc = 10:1, 78% yield (68.7 mg), colorless oil.

**$^1\text{H NMR}$  (400 MHz,  $\text{CDCl}_3$ ):**  $\delta$  7.23 (d,  $J = 8.1$  Hz, 2H), 7.17 (d,  $J = 8.0$  Hz, 2H), 5.83 (ddd,  $J = 17.3, 10.3, 8.2$  Hz, 1H), 5.25 – 5.15 (m, 2H), 4.32 (d,  $J = 7.9$  Hz, 1H), 2.48 (h,  $J = 7.0$  Hz, 1H), 2.36 (s, 3H), 2.25 – 2.12 (s, 1H), 0.88 (d,  $J = 6.8$  Hz, 3H).

**$^{13}\text{C NMR}$  (101 MHz,  $\text{CDCl}_3$ ):**  $\delta$  140.77, 139.40, 137.13, 128.82, 126.68, 116.50, 77.62, 46.10, 21.06, 16.45.

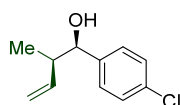

**4m**,  $R_f = 0.5$  (EA:PE=1:4), column solvent: hexane/EtOAc = 10:1, 74% yield (72.5 mg), colorless oil.

**$^1\text{H NMR}$  (400 MHz,  $\text{CDCl}_3$ ):**  $\delta$  7.30 (d,  $J = 8.6$  Hz, 2H), 7.24 (d,  $J = 8.4$  Hz, 2H), 5.75 (ddd,  $J = 17.8, 9.8, 8.2$  Hz, 1H), 5.17 (dd,  $J = 14.7, 2.1$  Hz, 2H), 4.31 (d,  $J = 7.7$  Hz, 1H), 2.41 (dq,  $J = 14.6, 7.0$  Hz, 1H), 2.33 (s, 1H), 0.86 (d,  $J = 6.8$  Hz, 3H).

**$^{13}\text{C NMR}$  (101 MHz,  $\text{CDCl}_3$ ):**  $\delta$  140.80, 140.08, 133.15, 128.26, 128.11, 117.10, 77.00, 46.23, 16.29.

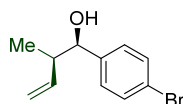

**4n**,  $R_f = 0.5$  (EA:PE=1:4), column solvent: hexane/EtOAc = 10:1, 62% yield (74.4 mg), colorless oil.

**$^1\text{H NMR}$  (400 MHz,  $\text{CDCl}_3$ ):**  $\delta$  7.48 – 7.42 (m, 2H), 7.21 – 7.15 (m, 2H), 5.81 – 5.69 (m, 1H), 5.22 – 5.12 (m, 2H), 4.30 (dd,  $J = 7.7, 2.3$  Hz, 1H), 2.40 (h,  $J = 7.1$  Hz, 1H), 2.34 (d,  $J = 2.6$  Hz, 1H), 0.86 (d,  $J = 6.8$  Hz, 3H).

**$^{13}\text{C NMR}$  (101 MHz,  $\text{CDCl}_3$ ):**  $\delta$  141.30, 140.03, 131.20, 128.47, 121.29, 117.14, 77.02, 46.17, 16.28.

**HRMS (ESI)**  $[\text{M}-\text{OH}]^+$  calculated for  $\text{C}_{11}\text{H}_{12}\text{Br}^+$ : 223.0117, Found: 223.0113.

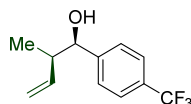

**4o**,  $R_f = 0.5$  (EA:PE=1:4), column solvent: hexane/EtOAc = 10:1, 83% yield (95.5 mg), colorless oil.

**$^1\text{H NMR}$  (400 MHz,  $\text{CDCl}_3$ ):**  $\delta$  7.60 (d,  $J = 8.1$  Hz, 2H), 7.44 (d,  $J = 8.5$  Hz, 2H), 5.84 – 5.70 (m, 1H), 5.22 (s, 1H), 5.20 – 5.16 (m, 1H), 4.42 (d,  $J = 7.5$  Hz, 1H), 2.46 (h,  $J = 6.9$  Hz, 1H), 2.32 (s, 1H), 0.90 (d,  $J = 6.8$  Hz, 3H).

**<sup>13</sup>C NMR (101 MHz, CDCl<sub>3</sub>):** δ 146.34, 139.74, 129.76 (q, *J* = 32.3 Hz), 127.12, 125.11 (q, *J* = 3.8 Hz), 124.14 (q, *J* = 272.7 Hz), 117.54, 77.10, 46.33, 16.30.

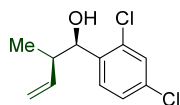

**4p**, *R<sub>f</sub>* = 0.5 (EA:PE=1:4), column solvent: hexane/EtOAc = 10:1, 70% (80.9 mg), colorless oil.

**<sup>1</sup>H NMR (400 MHz, CDCl<sub>3</sub>):** δ 7.40 (d, *J* = 8.5 Hz, 1H), 7.34 (d, *J* = 2.1 Hz, 1H), 7.25 (dd, *J* = 8.5, 2.1 Hz, 1H), 5.77 (ddd, *J* = 18.2, 10.3, 7.9 Hz, 1H), 5.19 – 5.06 (m, 2H), 4.89 (d, *J* = 6.6 Hz, 1H), 2.51 (m, *J* = 7.0 Hz, 1H), 2.21 (s, 1H), 1.01 (d, *J* = 6.9 Hz, 3H).

**<sup>13</sup>C NMR (101 MHz, CDCl<sub>3</sub>):** δ 139.07, 138.95, 133.43, 133.12, 129.02, 128.93, 127.19, 117.41, 72.87, 45.12, 16.38.

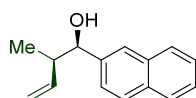

**4q**, *R<sub>f</sub>* = 0.5 (EA:PE=1:4), column solvent: hexane/EtOAc = 10:1, 90% (95.4 mg), colorless oil.

**<sup>1</sup>H NMR (400 MHz, CDCl<sub>3</sub>):** δ 7.89 – 7.83 (m, 3H), 7.78 (s, 1H), 7.50 (m, 3H), 5.87 (ddd, *J* = 17.4, 10.3, 8.1 Hz, 1H), 5.28 – 5.19 (m, 2H), 4.53 (d, *J* = 7.8 Hz, 1H), 2.61 (h, *J* = 7.1 Hz, 1H), 2.37 (s, 1H), 0.92 (d, *J* = 6.8 Hz, 3H).

**<sup>13</sup>C NMR (101 MHz, CDCl<sub>3</sub>):** δ 140.51, 139.81, 133.08, 133.01, 127.99, 127.88, 127.61, 125.99, 125.86, 125.74, 124.60, 116.84, 77.90, 46.07, 16.54.

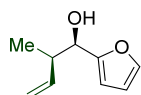

**4r**, *R<sub>f</sub>* = 0.5 (EA:PE=1:4), column solvent: hexane/EtOAc = 10:1, 55% (41.8 mg), colorless oil.

**<sup>1</sup>H NMR (400 MHz, CDCl<sub>3</sub>):** δ 7.40 – 7.37 (m, 1H), 6.36 – 6.30 (m, 1H), 6.26 (d, *J* = 3.2 Hz, 1H), 5.80 (ddd, *J* = 17.6, 10.3, 8.1 Hz, 1H), 5.25 – 5.14 (m, 2H), 4.42 (d, *J* = 7.7 Hz, 1H), 2.70 (h, *J* = 7.2 Hz, 1H), 2.17 (s, 1H), 0.94 (d, *J* = 6.8 Hz, 3H).

**<sup>13</sup>C NMR (101 MHz, CDCl<sub>3</sub>):** δ 154.94, 141.93, 139.94, 116.94, 110.03, 107.20, 71.30, 43.55, 16.18.

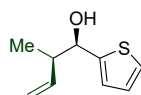

**4s**, *R<sub>f</sub>* = 0.5 (EA:PE=1:4), column solvent: hexane/EtOAc = 10:1, 50% (42.0 mg), colorless oil.

**<sup>1</sup>H NMR (400 MHz, CDCl<sub>3</sub>):** δ 7.26 (m, 1H), 6.97 (m, 2H), 5.83 (ddd, *J* = 18.1, 10.3, 8.1 Hz, 1H), 5.28 – 5.16 (m, 2H), 4.65 (d, *J* = 7.7 Hz, 1H), 2.54 (h, *J* = 7.2 Hz, 1H), 2.36 (s, 1H), 0.96 (d, *J* = 6.8 Hz, 3H).

**<sup>13</sup>C NMR (101 MHz, CDCl<sub>3</sub>):** δ 146.27, 140.04, 126.33, 124.74, 124.70, 117.24, 73.77, 46.67, 16.45.

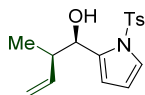

**4t**,  $R_f = 0.3$  (EA:PE=1:4), column solvent: hexane/EtOAc = 10:1, 70% (106.8 mg), colorless oil.

**$^1\text{H NMR}$  (400 MHz,  $\text{CDCl}_3$ ):**  $\delta$  7.68 (d,  $J = 8.4$  Hz, 2H), 7.30 – 7.27 (m, 2H), 7.26 (s, 1H), 6.31 – 6.28 (m, 1H), 6.27 – 6.22 (m, 1H), 5.91 – 5.78 (m, 1H), 5.14 (s, 1H), 5.11 (dd,  $J = 5.8, 1.5$  Hz, 1H), 4.78 (d,  $J = 7.6$  Hz, 1H), 2.69 – 2.61 (m, 1H), 2.38 (s, 3H), 2.31 (s, 1H), 0.88 (d,  $J = 6.9$  Hz, 3H).

**$^{13}\text{C NMR}$  (101 MHz,  $\text{CDCl}_3$ ):**  $\delta$  145.00, 140.05, 136.77, 136.39, 129.97, 126.66, 123.35, 116.43, 113.11, 111.69, 69.29, 43.83, 21.57, 17.30.

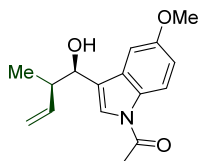

**4u**,  $R_f = 0.2$  (EA:PE=1:4), column solvent: hexane/EtOAc = 10:1, 70% (80.6 mg), colorless oil.

**$^1\text{H NMR}$  (400 MHz,  $\text{CDCl}_3$ ):**  $\delta$  8.28 (d,  $J = 7.7$  Hz, 1H), 7.26 (s, 1H), 7.08 (d,  $J = 2.5$  Hz, 1H), 6.92 (dd,  $J = 9.0, 2.5$  Hz, 1H), 5.84 (ddd,  $J = 18.2, 10.3, 7.9$  Hz, 1H), 5.25 – 5.15 (m, 2H), 4.62 (d,  $J = 7.4$  Hz, 1H), 3.84 (s, 3H), 2.74 (dp,  $J = 14.3, 7.0, 6.2$  Hz, 1H), 2.49 (m, 4H), 0.99 (d,  $J = 6.8$  Hz, 3H).

**$^{13}\text{C NMR}$  (101 MHz,  $\text{CDCl}_3$ ):**  $\delta$  168.24, 156.12, 140.12, 130.77, 129.69, 123.73, 123.34, 117.33, 116.87, 113.19, 103.14, 71.39, 55.61, 44.41, 23.53, 16.73.

**HRMS (ESI)  $[\text{M}+\text{Na}]^+$**  calculated for  $\text{C}_{16}\text{H}_{19}\text{NNaO}_3^+$ : 296.1257, found: 296.1253.

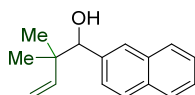

**4v**,  $R_f = 0.6$  (EA:PE=1:4), column solvent: hexane/EtOAc = 10:1, 88% (99.4 mg), colorless oil.

**$^1\text{H NMR}$  (400 MHz,  $\text{CDCl}_3$ ):**  $\delta$  7.89 – 7.83 (m, 2H), 7.80 (d,  $J = 8.5$  Hz, 1H), 7.76 (s, 1H), 7.53 – 7.43 (m, 3H), 5.98 (dd,  $J = 17.5, 10.8$  Hz, 1H), 5.18 (dd,  $J = 10.8, 1.3$  Hz, 1H), 5.12 (dd,  $J = 17.5, 1.2$  Hz, 1H), 4.60 (s, 1H), 2.20 (s, 1H), 1.08 (s, 3H), 1.03 (s, 3H).

**$^{13}\text{C NMR}$  (101 MHz,  $\text{CDCl}_3$ ):**  $\delta$  145.03, 138.36, 132.86, 132.71, 127.96, 127.53, 126.86, 126.57, 126.04, 125.86, 125.68, 113.93, 80.65, 42.48, 24.50, 21.12.

**HRMS (ESI)  $[\text{M}-\text{OH}]^+$**  calculated for  $\text{C}_{16}\text{H}_{17}^+$ : 209.1325, found: 209.1321.

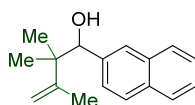

**4w**,  $R_f = 0.6$  (EA:PE=1:4), column solvent: hexane/EtOAc = 10:1, 85% (102.1 mg), colorless oil.

**<sup>1</sup>H NMR (400 MHz, CDCl<sub>3</sub>):** δ 7.91 – 7.85 (m, 2H), 7.82 (m, 2H), 7.51 (m, 3H), 5.09 (s, 1H), 5.03 (s, 1H), 4.82 (s, 1H), 2.35 (s, 1H), 1.93 (s, 3H), 1.08 (s, 3H), 1.03 (s, 3H).

**<sup>13</sup>C NMR (101 MHz, CDCl<sub>3</sub>):** δ 150.52, 137.93, 132.82, 132.70, 127.91, 127.48, 126.73, 126.69, 126.20, 125.75, 125.56, 113.19, 77.49, 44.71, 24.24, 20.19, 19.79.

**HRMS (ESI) [M-OH]<sup>+</sup>** calculated for C<sub>17</sub>H<sub>19</sub><sup>+</sup>: 223.1481, found: 223.1478.

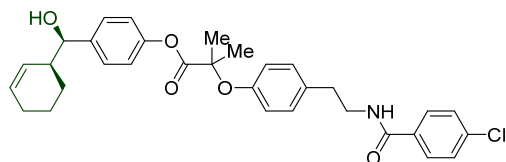

**5a**, R<sub>f</sub> = 0.2 (EA:PE=1:4), column solvent: hexane/EtOAc = 10:1, 68% (186.0mg), colorless oil.

**<sup>1</sup>H NMR (400 MHz, CDCl<sub>3</sub>):** δ 7.60 – 7.58 (m, 1H), 7.58 – 7.56 (m, 1H), 7.34 – 7.27 (m, 4H), 7.11 (s, 1H), 7.09 (s, 1H), 6.98 – 6.96 (m, 1H), 6.96 – 6.94 (m, 1H), 6.92 – 6.91 (m, 1H), 6.90 – 6.88 (m, 1H), 6.38 (t, J = 5.8 Hz, 1H), 5.84 – 5.74 (m, 1H), 5.35 (dd, J = 10.1, 2.5 Hz, 1H), 4.55 (d, J = 6.4 Hz, 1H), 3.59 (q, J = 6.7 Hz, 2H), 2.83 (t, J = 7.0 Hz, 2H), 2.49 – 2.37 (m, 1H), 2.27 (s, 1H), 1.99 – 1.92 (m, 2H), 1.76 – 1.64 (m, 8H), 1.52 – 1.43 (m, 2H).

**<sup>13</sup>C NMR (101 MHz, CDCl<sub>3</sub>):** δ 172.92, 166.39, 153.97, 149.54, 140.90, 137.46, 132.82, 132.65, 130.40, 129.52, 128.65, 128.22, 127.67, 127.54, 120.74, 119.33, 79.16, 76.56, 42.90, 41.21, 34.59, 25.34, 25.10, 23.70, 20.95.

**HRMS (ESI) [M+Na]<sup>+</sup>** calculated for C<sub>32</sub>H<sub>34</sub>ClNNaO<sub>5</sub><sup>+</sup>: 570.2018, found: 570.2013.

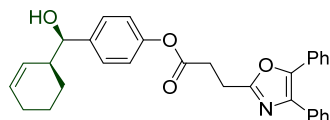

**5b**, R<sub>f</sub> = 0.3 (EA:PE=1:4), column solvent: hexane/EtOAc = 10:1, 63% (150.9 mg), colorless oil.

**<sup>1</sup>H NMR (400 MHz, CDCl<sub>3</sub>):** δ 7.68 – 7.66 (m, 1H), 7.66 – 7.64 (m, 1H), 7.61 – 7.59 (m, 1H), 7.59 – 7.57 (m, 1H), 7.41 – 7.31 (m, 8H), 7.11 – 7.09 (m, 2H), 7.08 – 7.06 (m, 1H), 5.85 – 5.77 (m, 1H), 5.38 (dd, J = 10.2, 2.4 Hz, 1H), 4.57 (d, J = 6.4 Hz, 1H), 3.29 (t, J = 7.0 Hz, 2H), 3.16 (t, J = 7.1 Hz, 2H), 2.53 – 2.39 (m, 1H), 2.07 (s, 1H), 2.01 – 1.91 (m, 2H), 1.77 – 1.66 (m, 2H), 1.56 – 1.44 (m, 2H).

**<sup>13</sup>C NMR (101 MHz, CDCl<sub>3</sub>):** δ 170.61, 161.42, 149.72, 145.52, 140.57, 135.10, 132.32, 130.47, 128.87, 128.60, 128.51, 128.46, 128.04, 127.84, 127.78, 127.47, 126.48, 121.14, 76.68, 42.93, 31.21, 25.15, 23.70, 23.46, 21.00.

**HRMS (ESI) [M+Na]<sup>+</sup>** calculated for C<sub>31</sub>H<sub>29</sub>NNaO<sub>4</sub><sup>+</sup>: 302.1989, found: 302.1986.

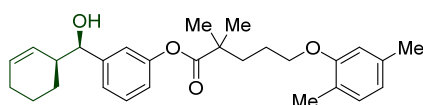

**5c**, R<sub>f</sub> = 0.6 (EA:PE=1:4), column solvent: hexane/EtOAc = 10:1, 65% (141.7 mg), colorless oil.

**<sup>1</sup>H NMR (400 MHz, CDCl<sub>3</sub>):** δ 7.37 – 7.32 (m, 2H), 7.06 – 7.00 (m, 3H), 6.68 (d, J = 7.0 Hz, 1H), 6.64 (s, 1H), 5.88 – 5.79 (m, 1H), 5.45 – 5.35 (m, 1H), 4.60 (d, J = 6.4 Hz, 1H), 4.03 – 3.96 (m, 2H), 2.53 – 2.44 (m, 1H), 2.32 (s, 3H), 2.19 (s, 3H), 2.02 – 1.98 (m, 2H), 1.94 (s, 1H), 1.90 (d, J = 3.0 Hz, 4H), 1.79 – 1.69 (m, 2H), 1.56 – 1.49 (m, 2H), 1.39 (s, 6H).

**<sup>13</sup>C NMR (101 MHz, CDCl<sub>3</sub>):** δ 176.34, 156.83, 150.13, 140.25, 136.43, 130.51, 130.30, 127.78, 127.43, 123.57, 121.17, 120.71, 111.91, 76.77, 67.74, 42.98, 42.38, 37.11, 25.23, 25.17, 25.12, 23.72, 21.36, 21.02, 15.76.

**HRMS (ESI) [M+Na]<sup>+</sup>** calculated for C<sub>28</sub>H<sub>36</sub>NaO<sub>4</sub><sup>+</sup>: 459.2506, found: 459.2501.

## 8. Supplementary Reference

- [1] M. J. Frisch, G. W. Trucks, H. B. Schlegel, G. E. Scuseria, M. A. Robb, J. R. Cheeseman, G. Scalmani, V. Barone, G. A. Petersson, H. Nakatsuji, X. Li, M. Caricato, A. V. Marenich, J. Bloino, B. G. Janesko, R. Gomperts, B. Mennucci, H. P. Hratchian, J. V. Ortiz, A. F. Izmaylov, J. L. Sonnenberg, D. Williams-Young, F. Ding, F. Lipparini, F. Egidi, J. Goings, B. Peng, A. Petrone, T. Henderson, D. Ranasinghe, V. G. Zakrzewski, J. Gao, N. Rega, G. Zheng, W. Liang, M. Hada, M. Ehara, K. Toyota, R. Fukuda, J. Hasegawa, M. Ishida, T. Nakajima, Y. Honda, O. Kitao, H. Nakai, T. Vreven, K. Throssell, J. A. Montgomery, Jr., J. E. Peralta, F. Ogliaro, M. J. Bearpark, J. J. Heyd, E. N. Brothers, K. N. Kudin, V. N. Staroverov, T. A. Keith, R. Kobayashi, J. Normand, K. Raghavachari, A. P. Rendell, J. C. Burant, S. S. Iyengar, J. Tomasi, M. Cossi, J. M. Millam, M. Klene, C. Adamo, R. Cammi, J. W. Ochterski, R. L. Martin, K. Morokuma, O. Farkas, J. B. Foresman, and D. J. Fox, Gaussian, Inc., Wallingford CT, 2016.
- [2] Jeng-Da Chai, Martin Head-Gordon, *Phys. Chem. Chem. Phys.*, 2008, 10, 6615-6620
- [3] Lindsay E. Roy, P. Jeffrey Hay, Richard L. Martin, *J. Chem. Theory Comput.* 2008, 4, 7, 1029-1031
- [4] W. J. Hehre, R. Ditchfield, J. A. Pople, *J. Chem. Phys.* 1972, 56, 2257-2261
- [5] W. J. Hehre, R. F. Stewart, J. A. Pople, *J. Chem. Phys.* 1969, 51, 2657-2664

## 9. <sup>1</sup>H and <sup>13</sup>C-NMR spectra of compounds

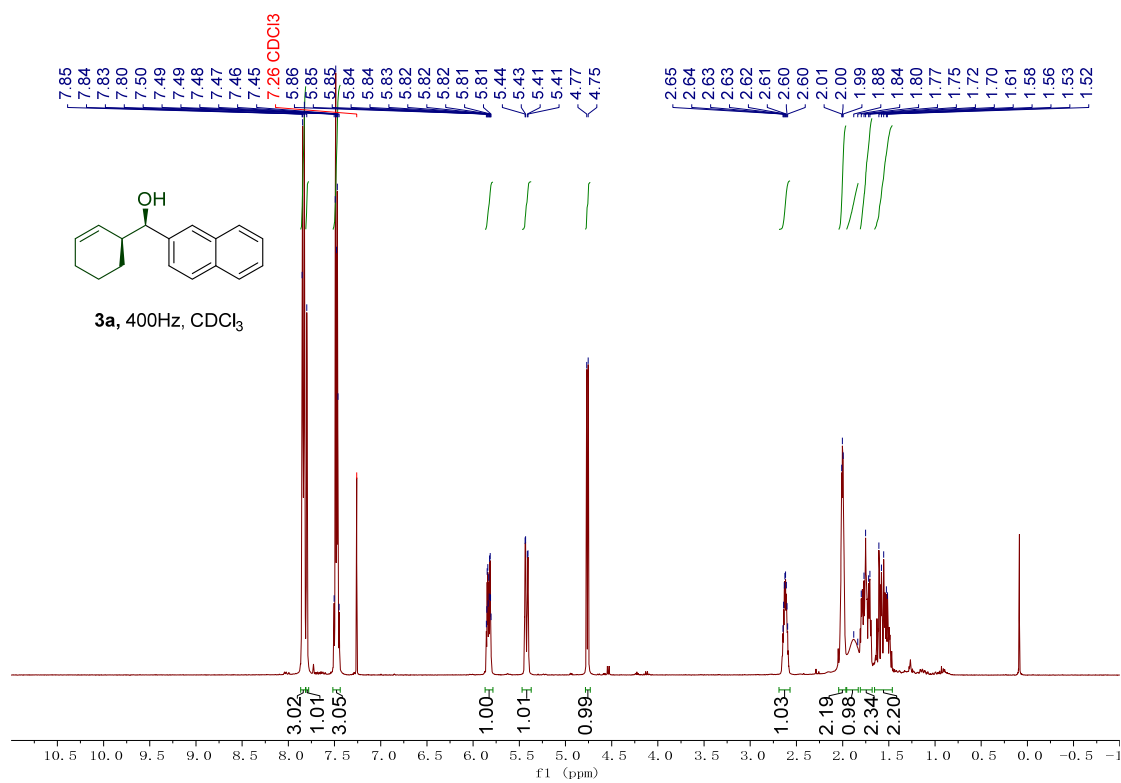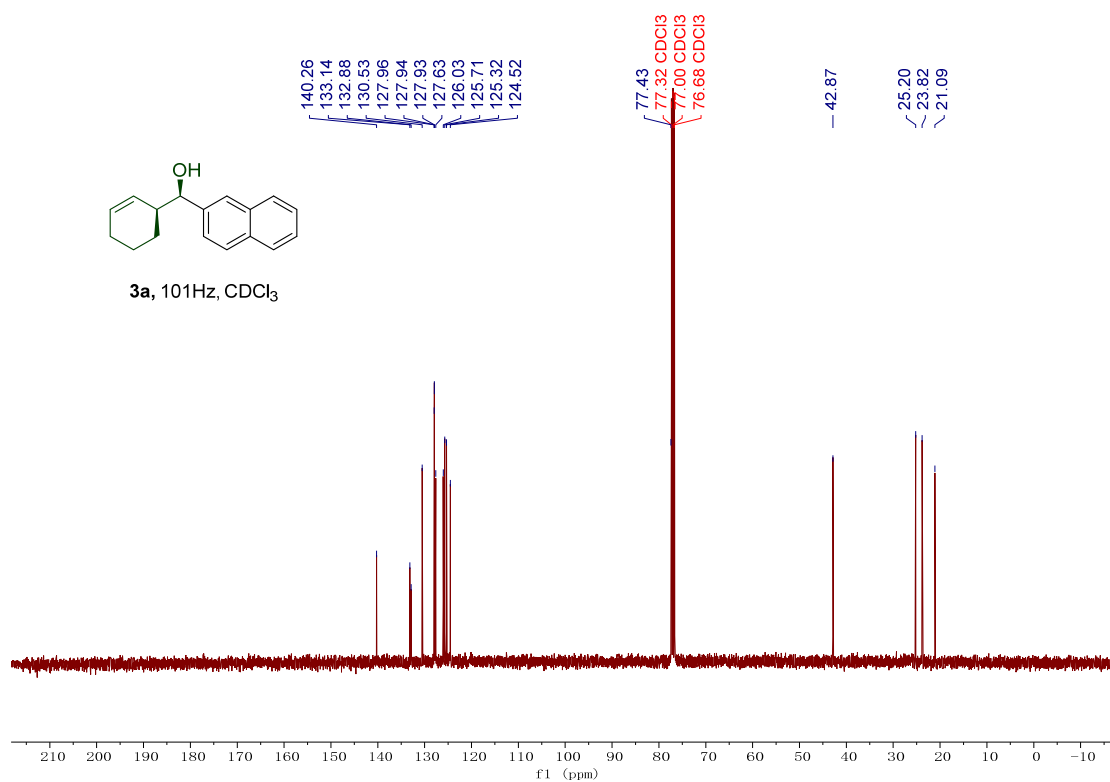



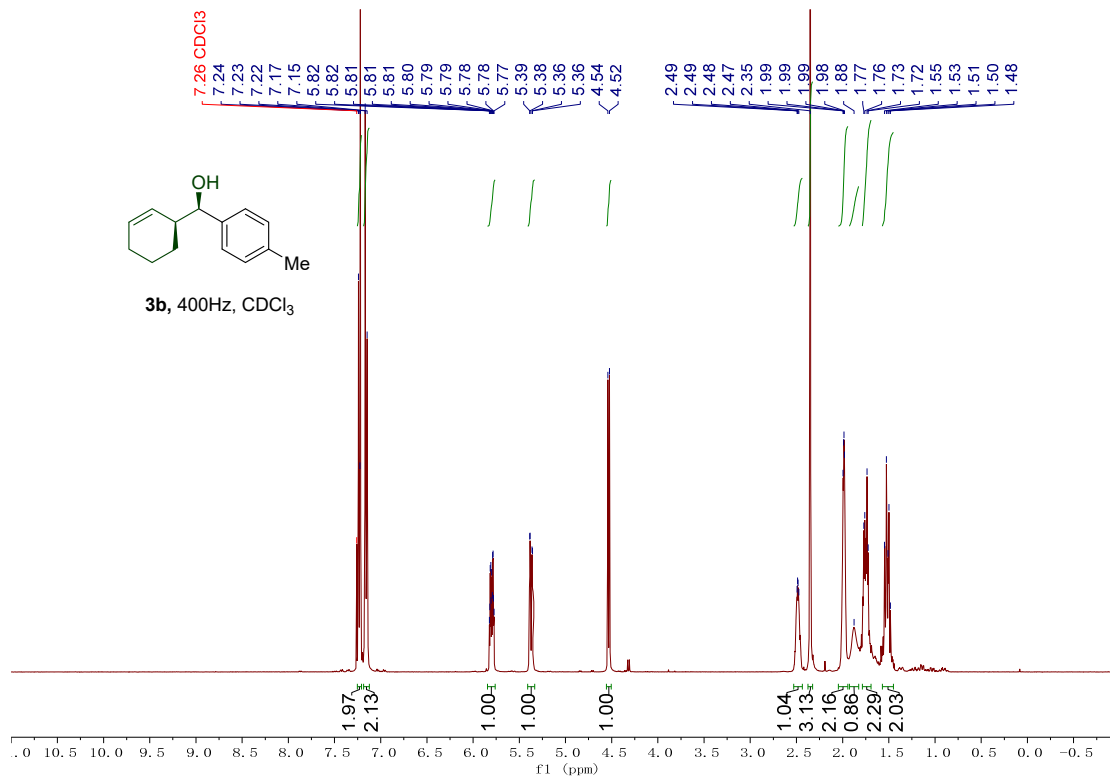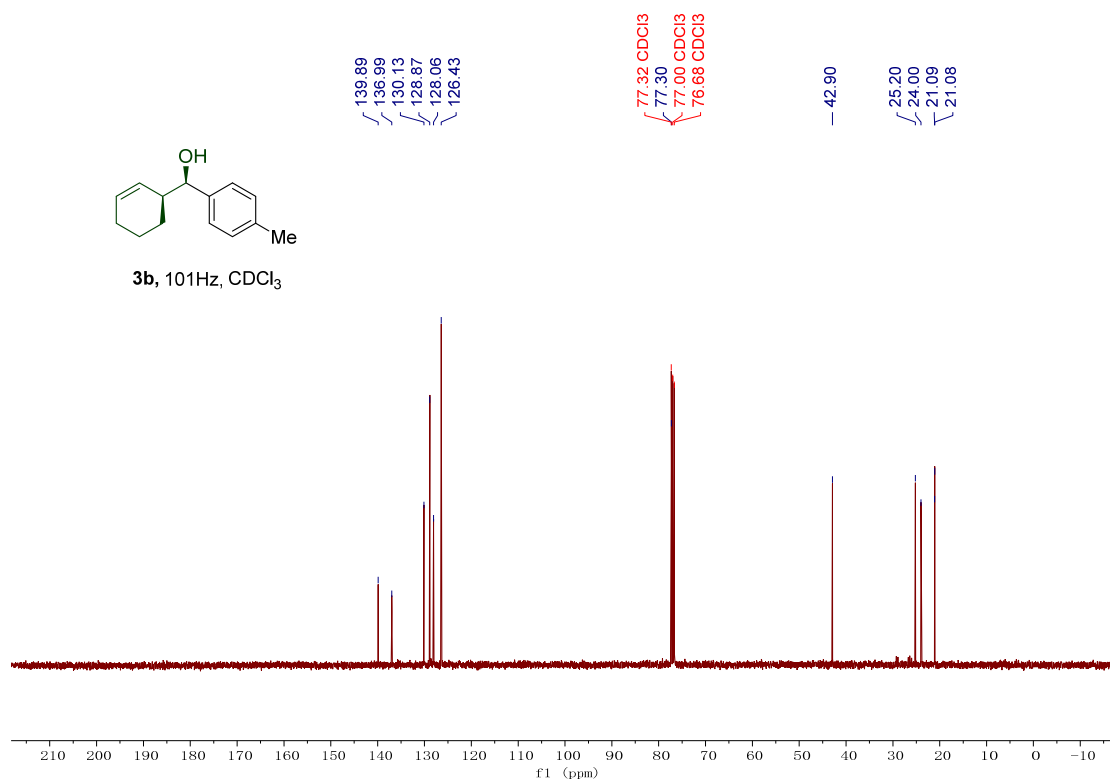

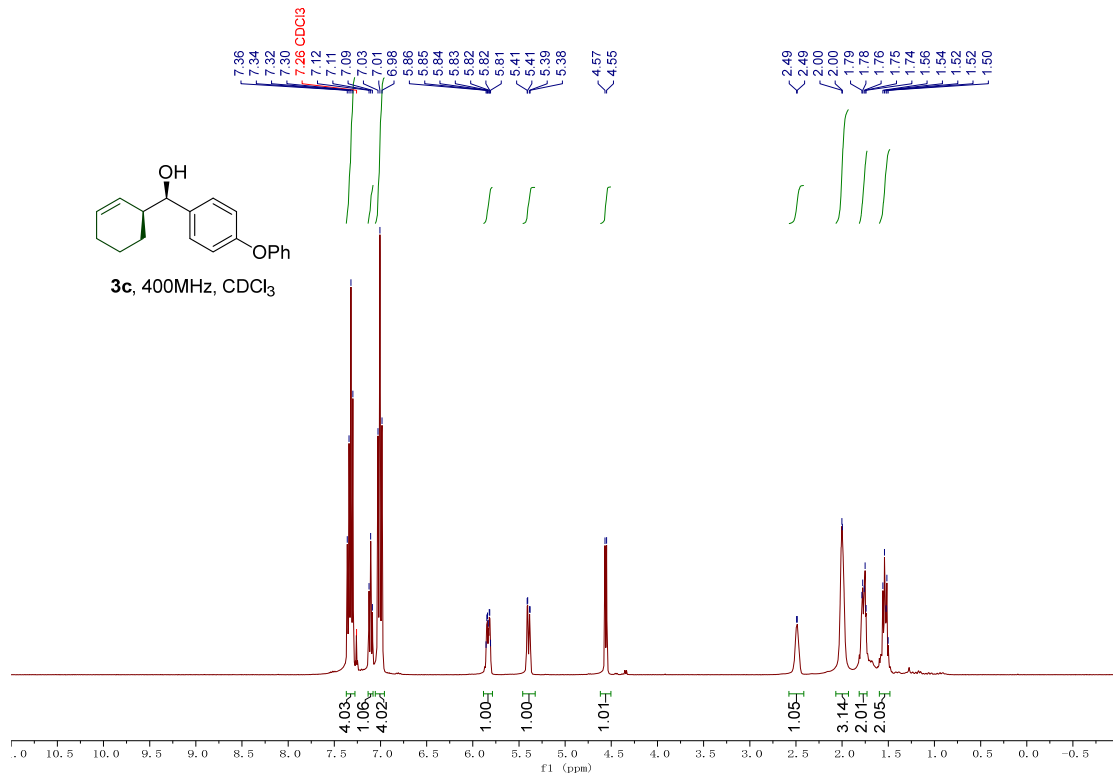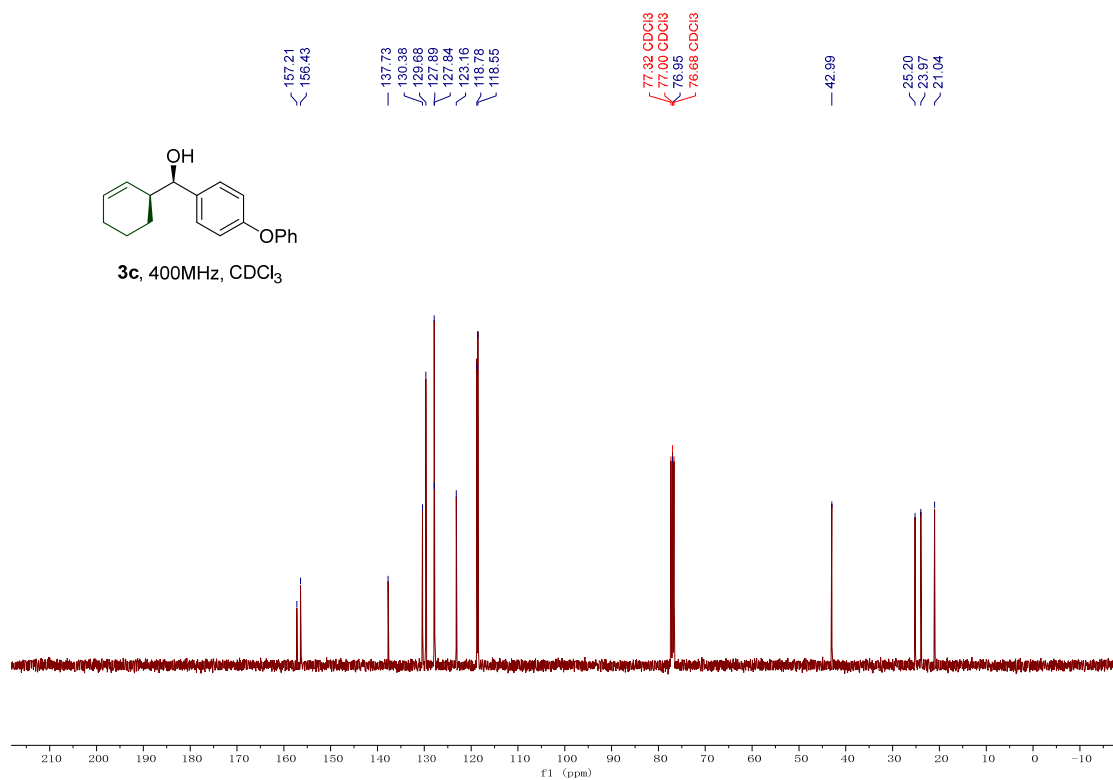

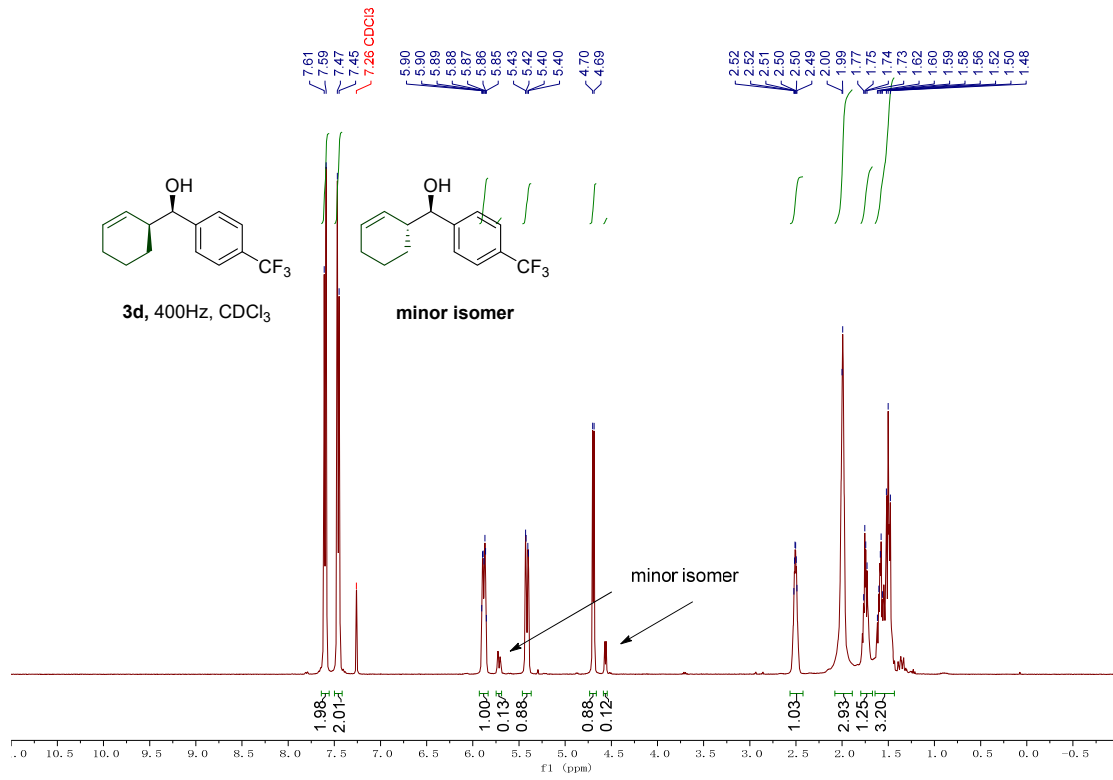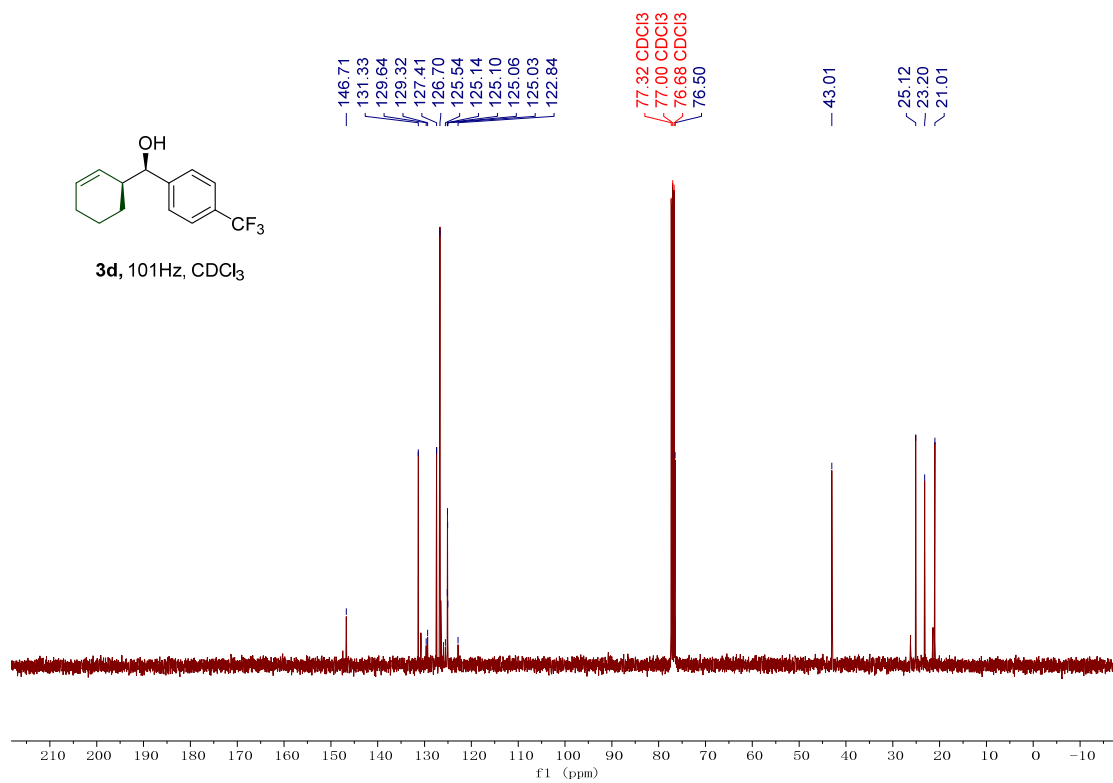

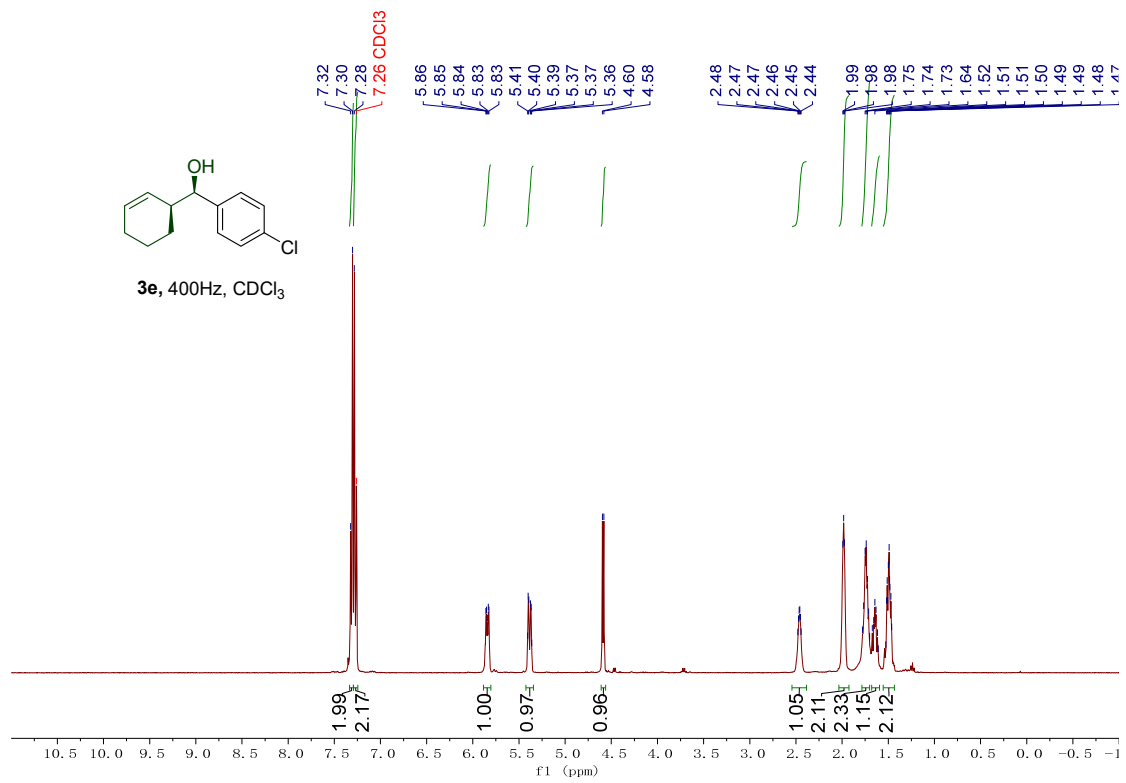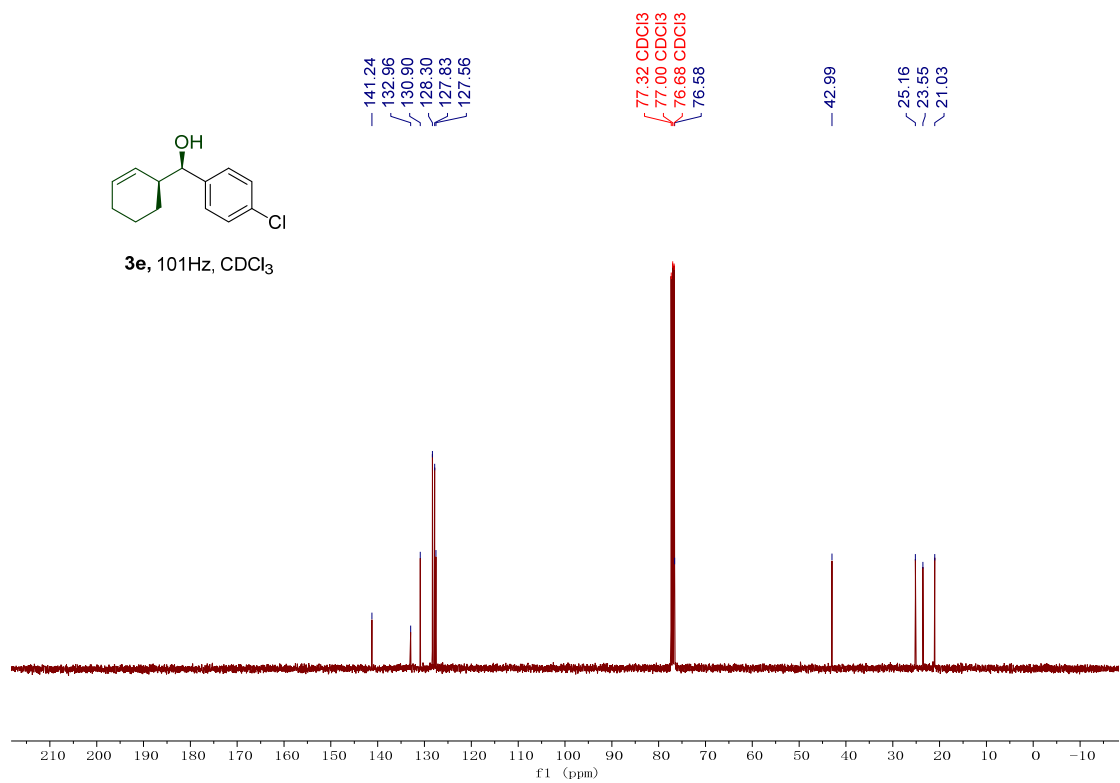

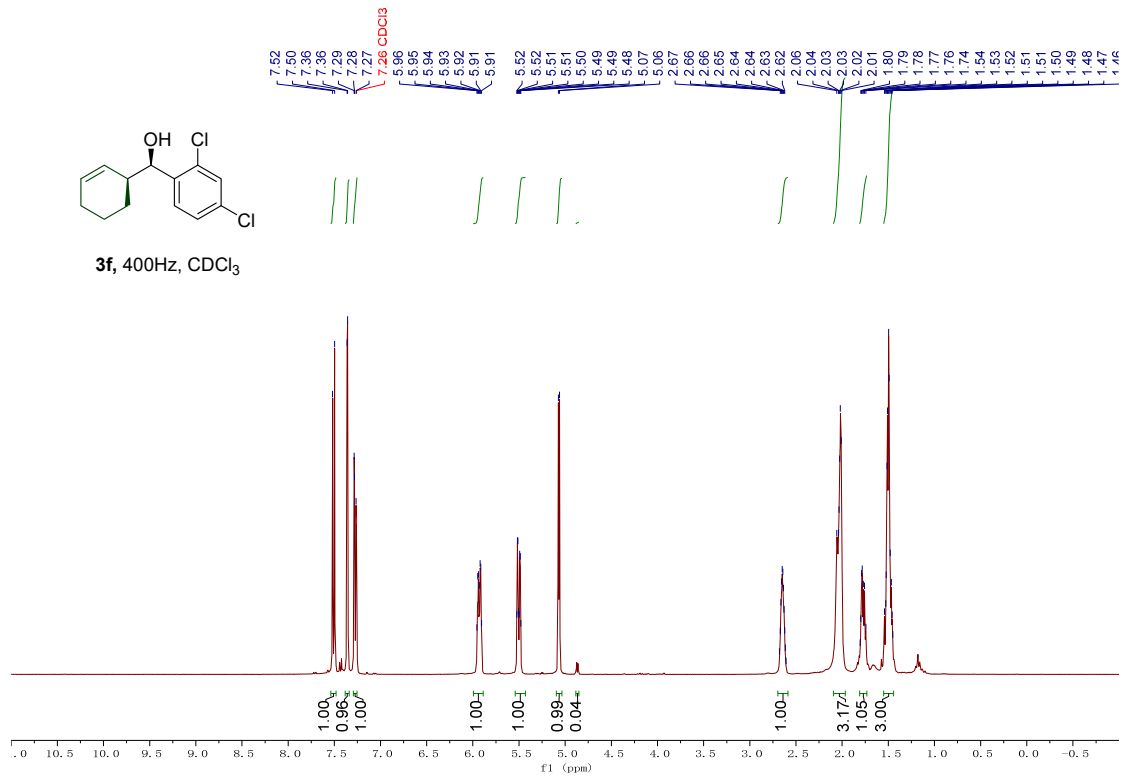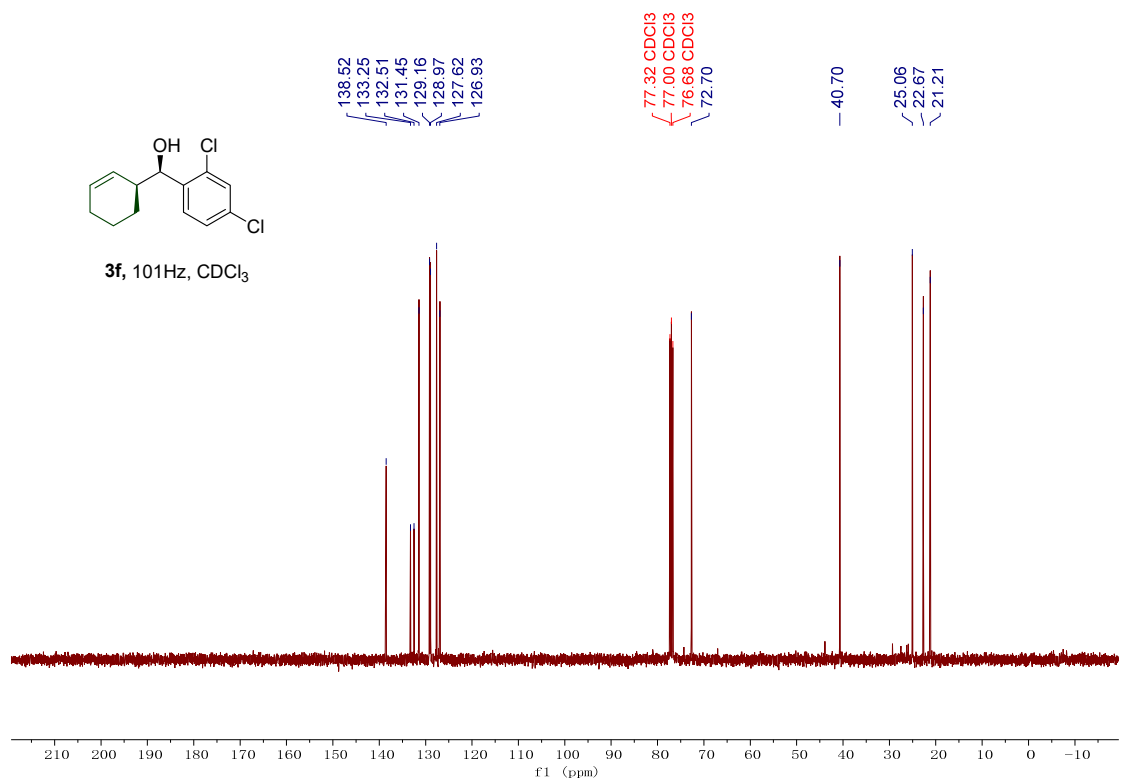

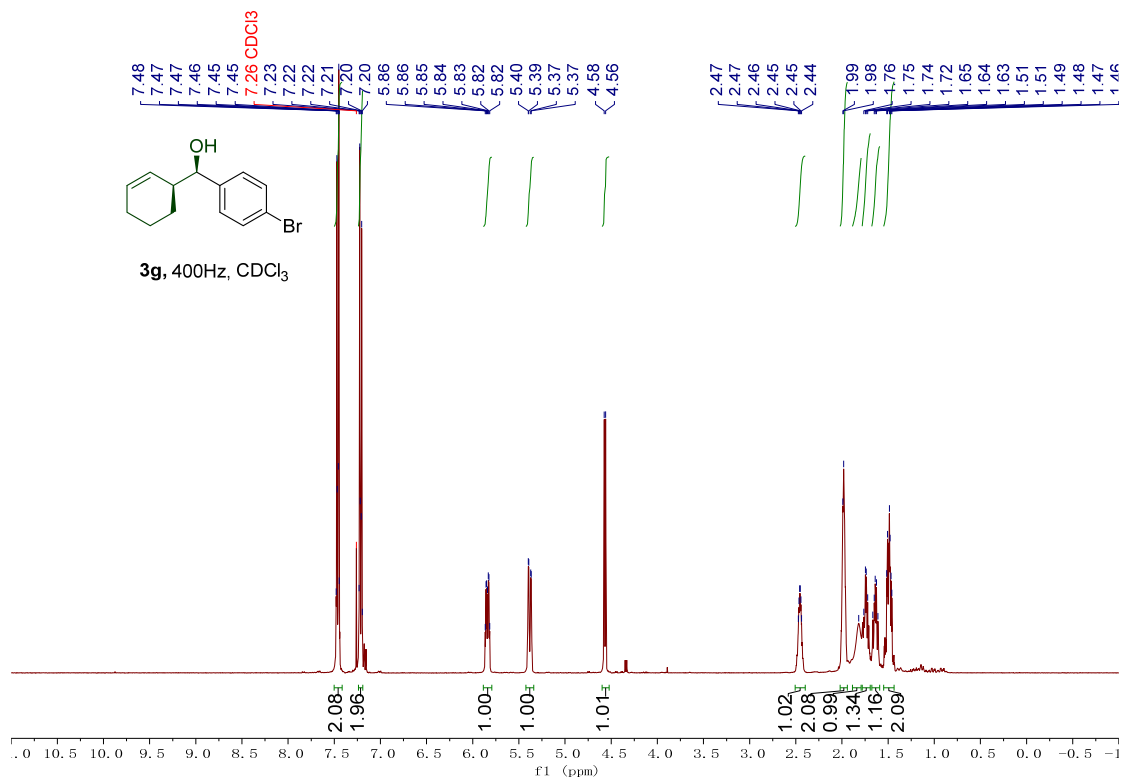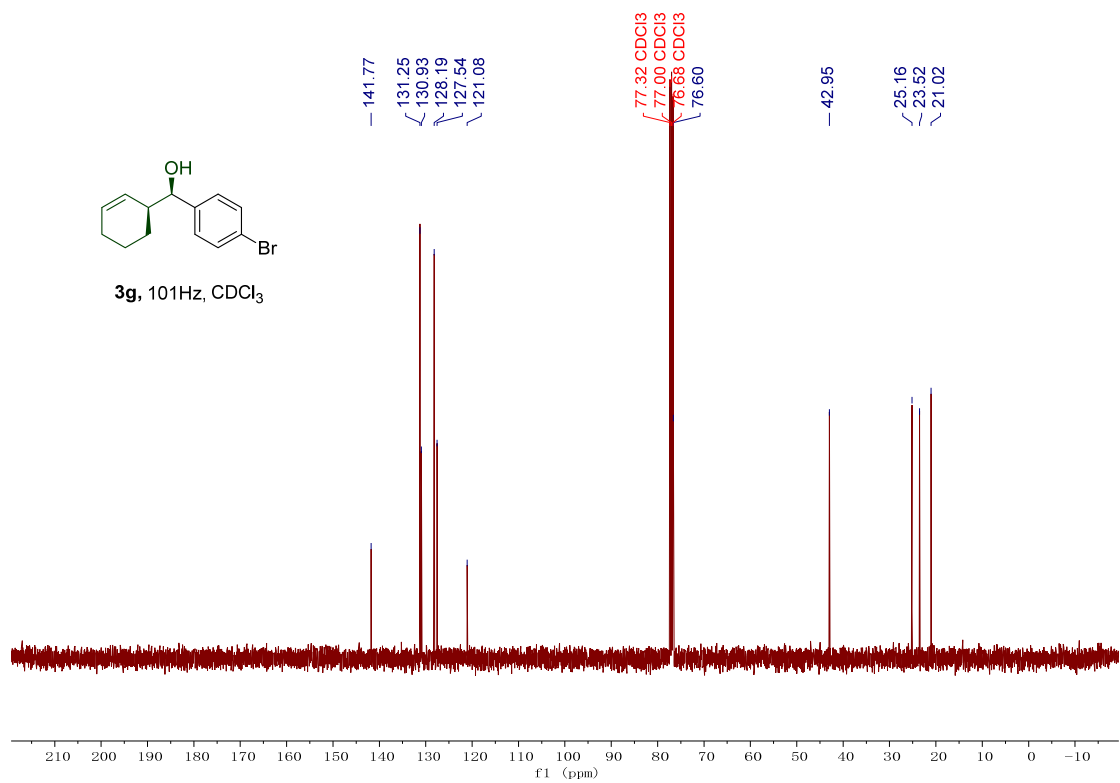

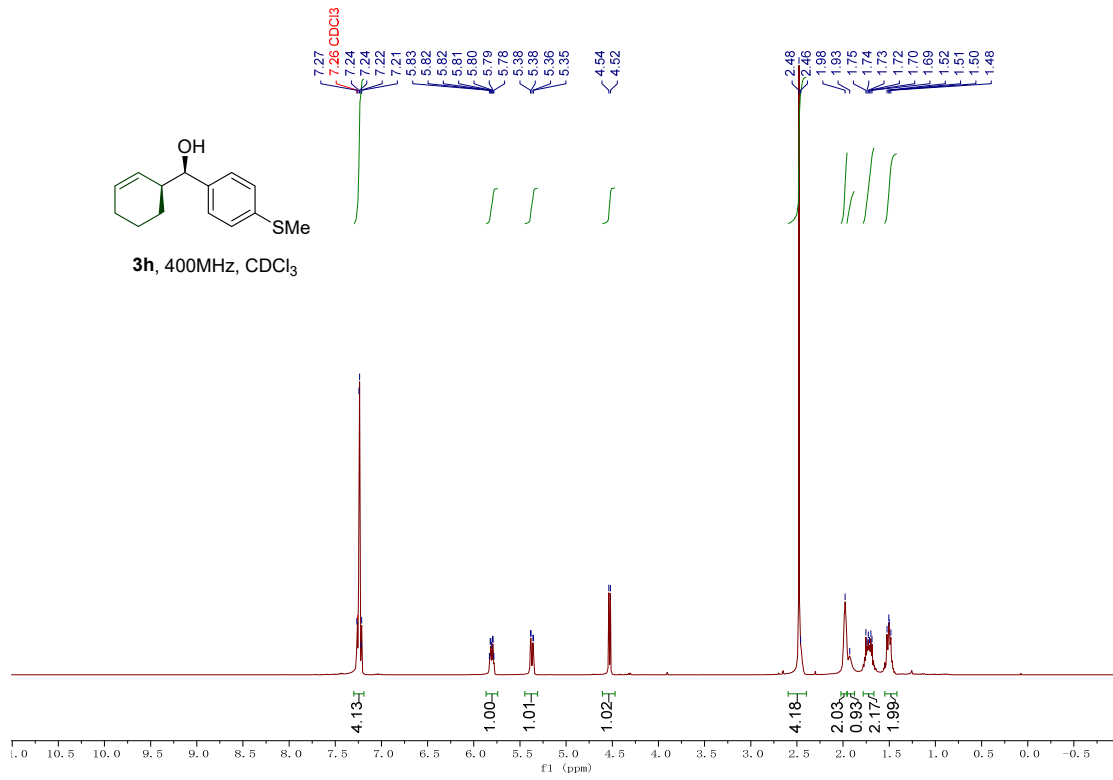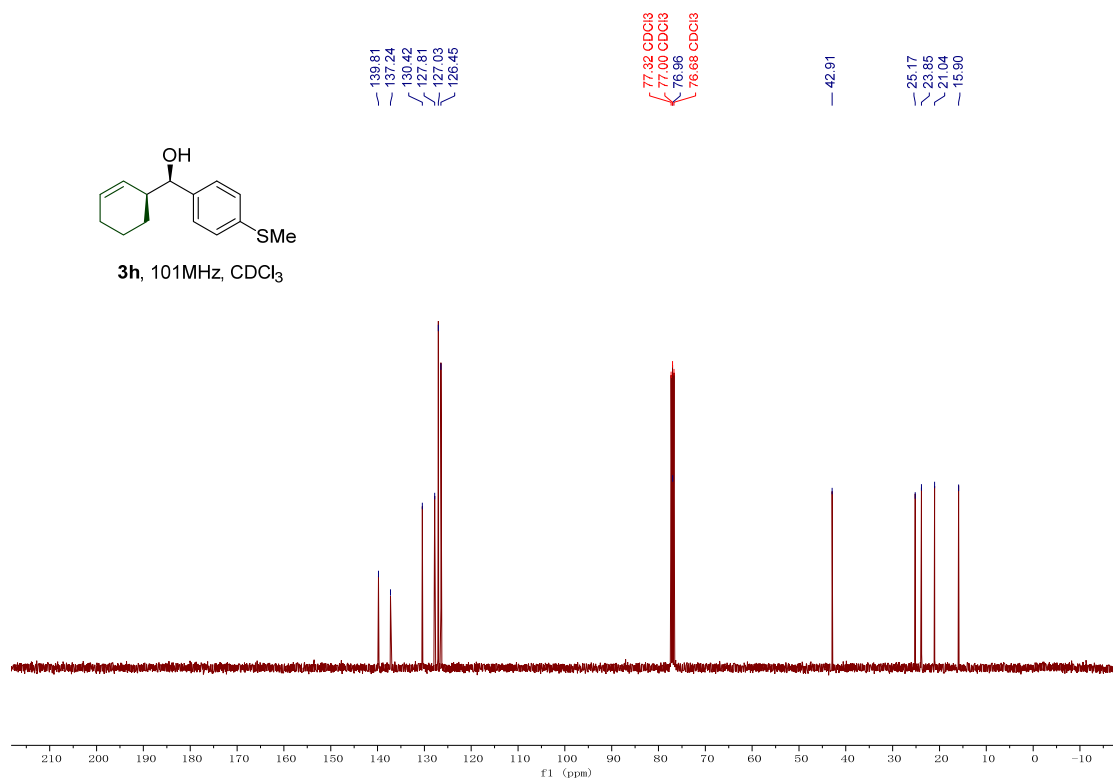

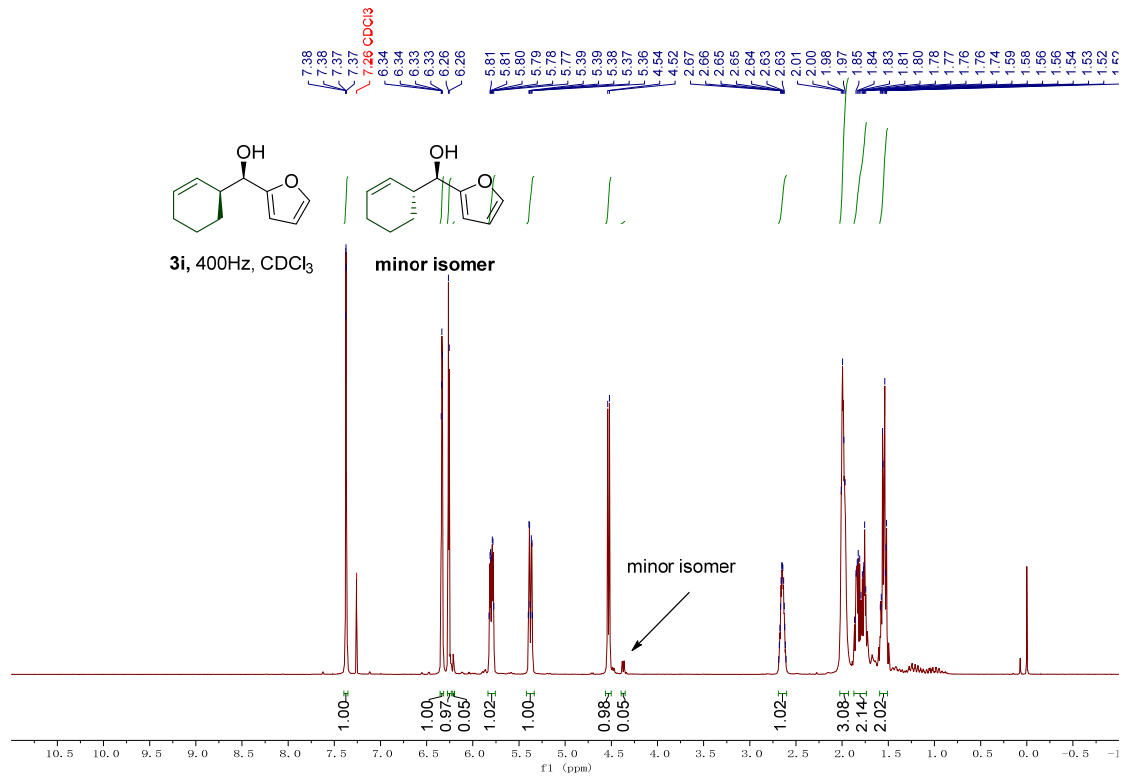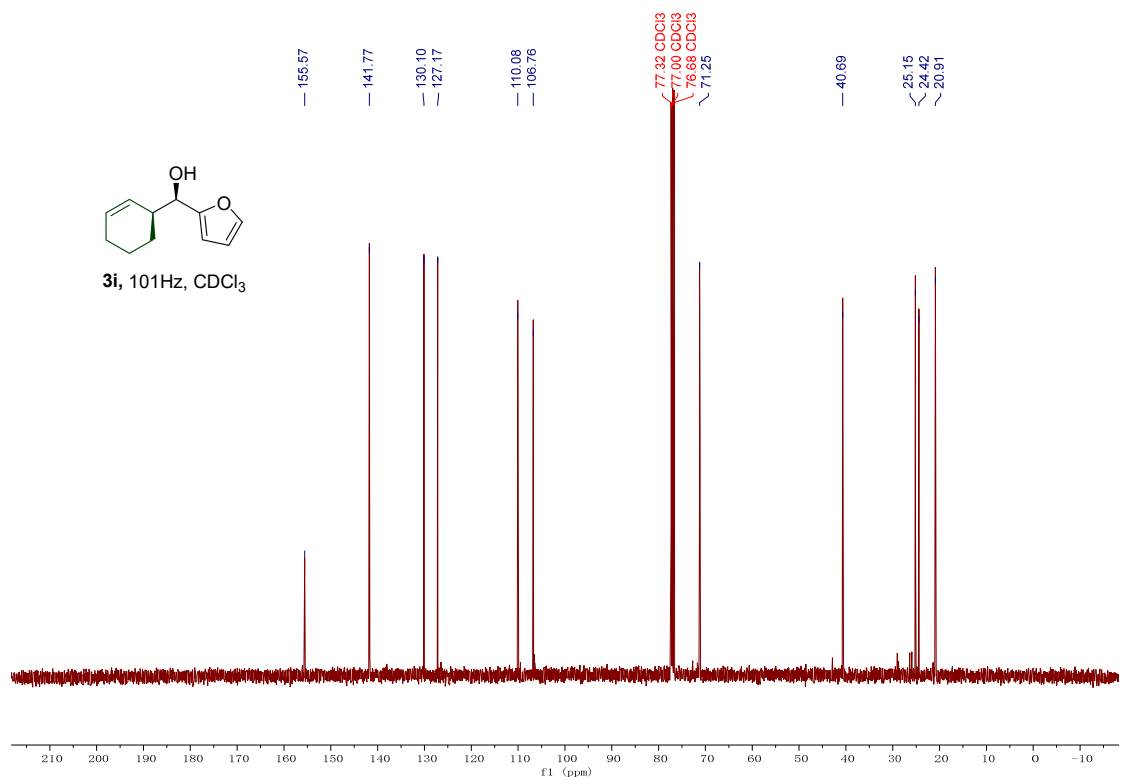



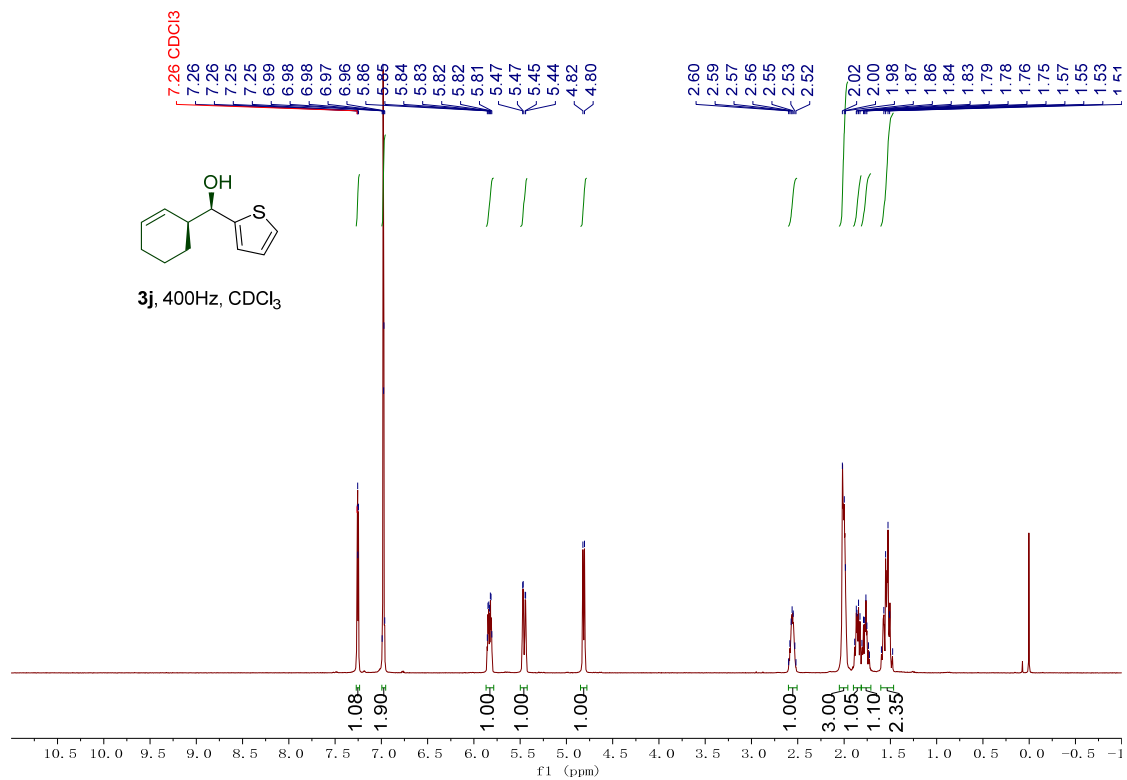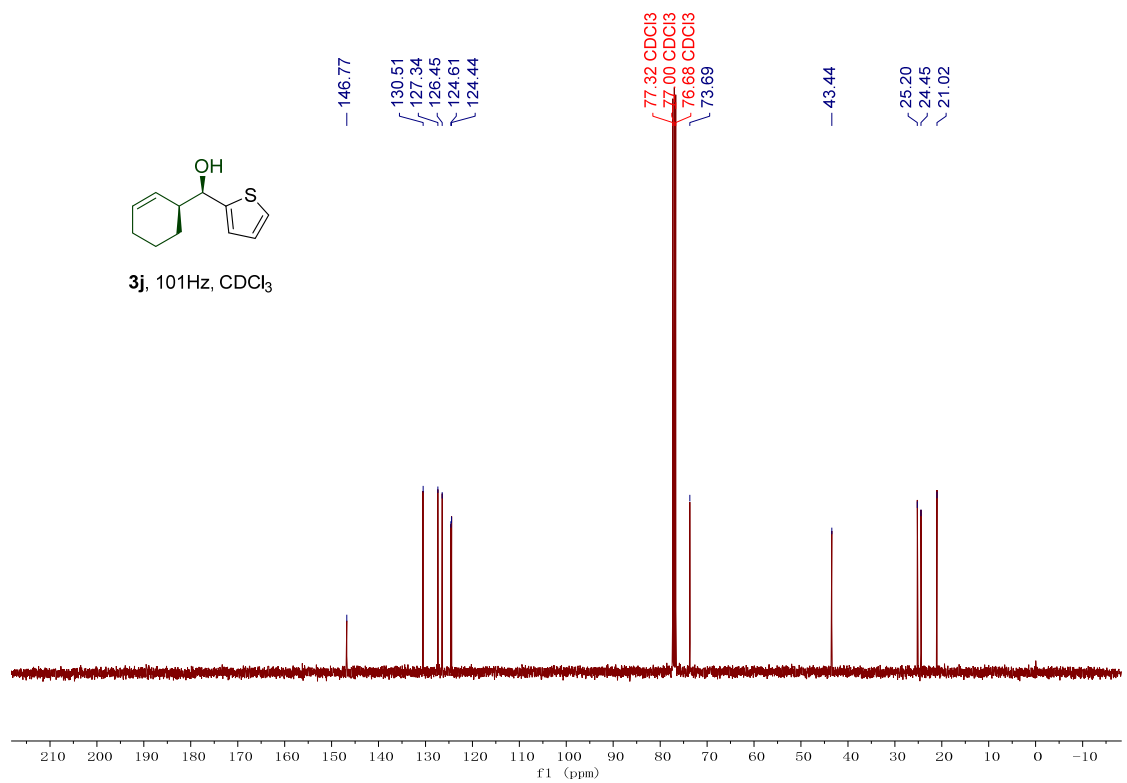

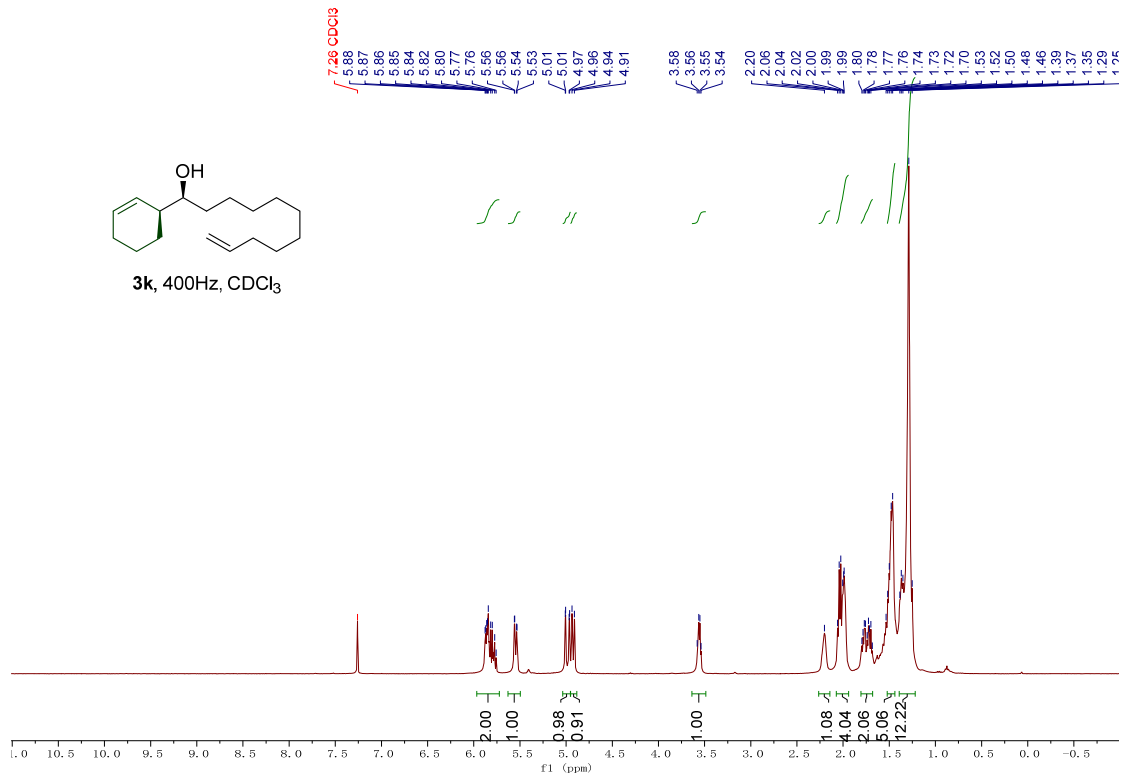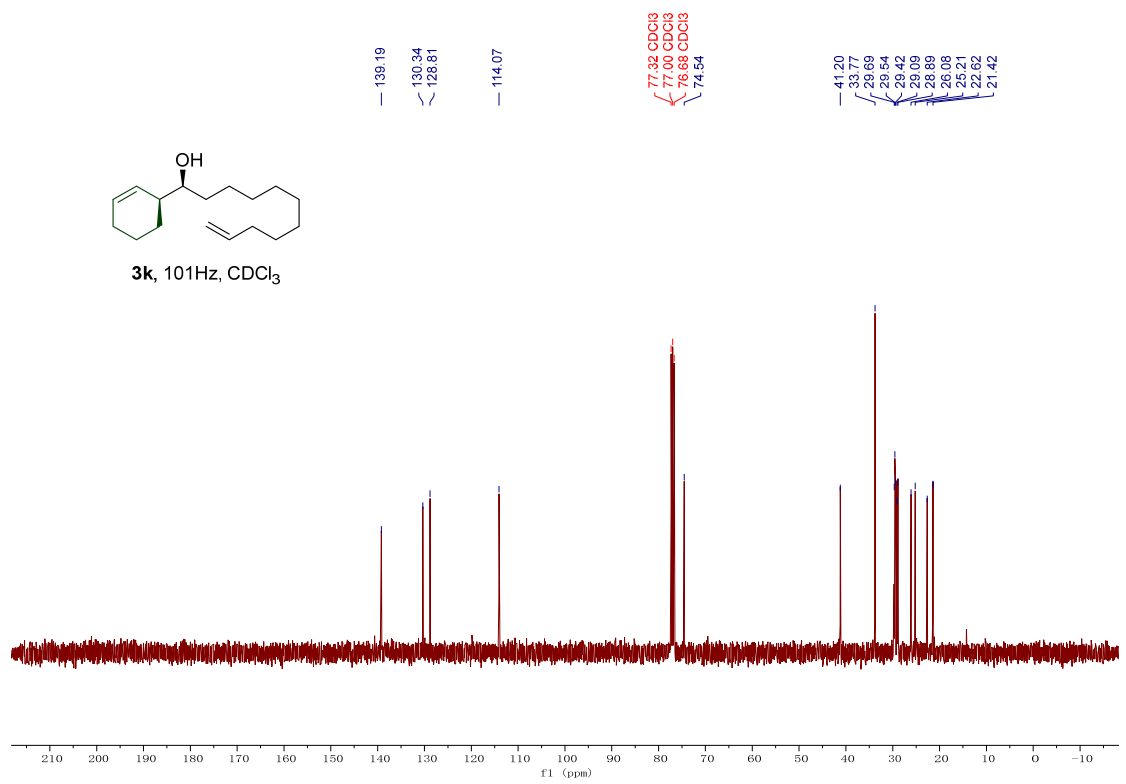

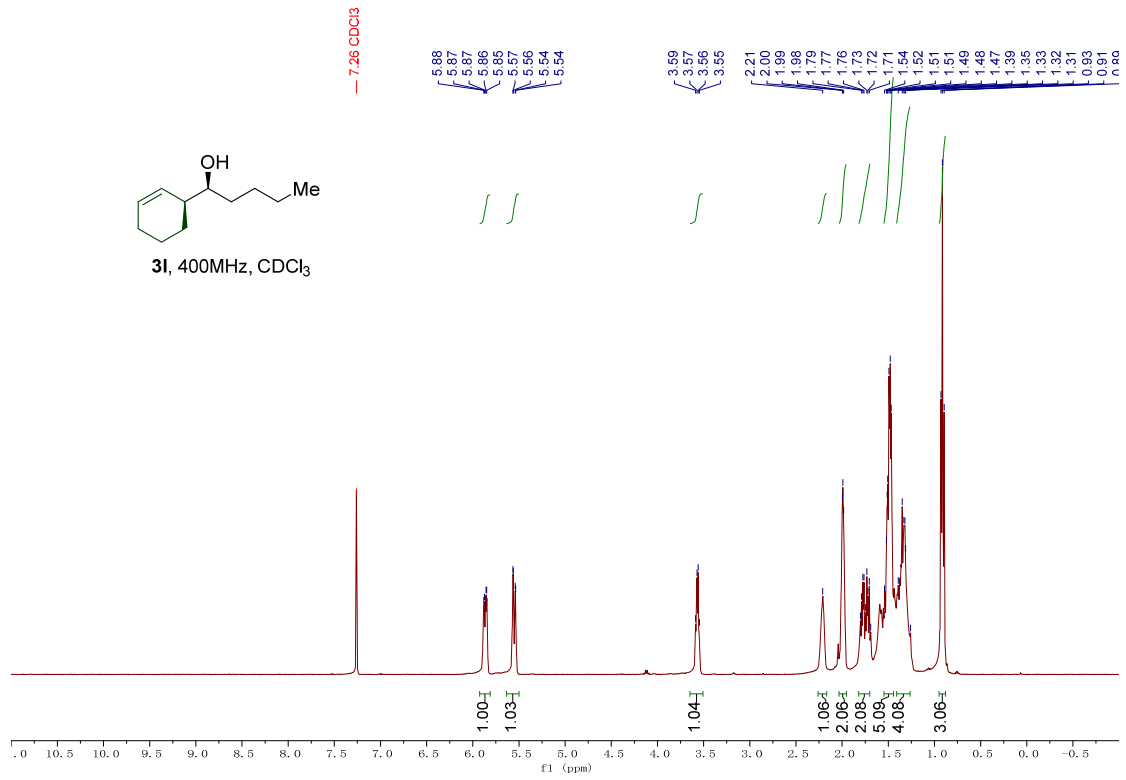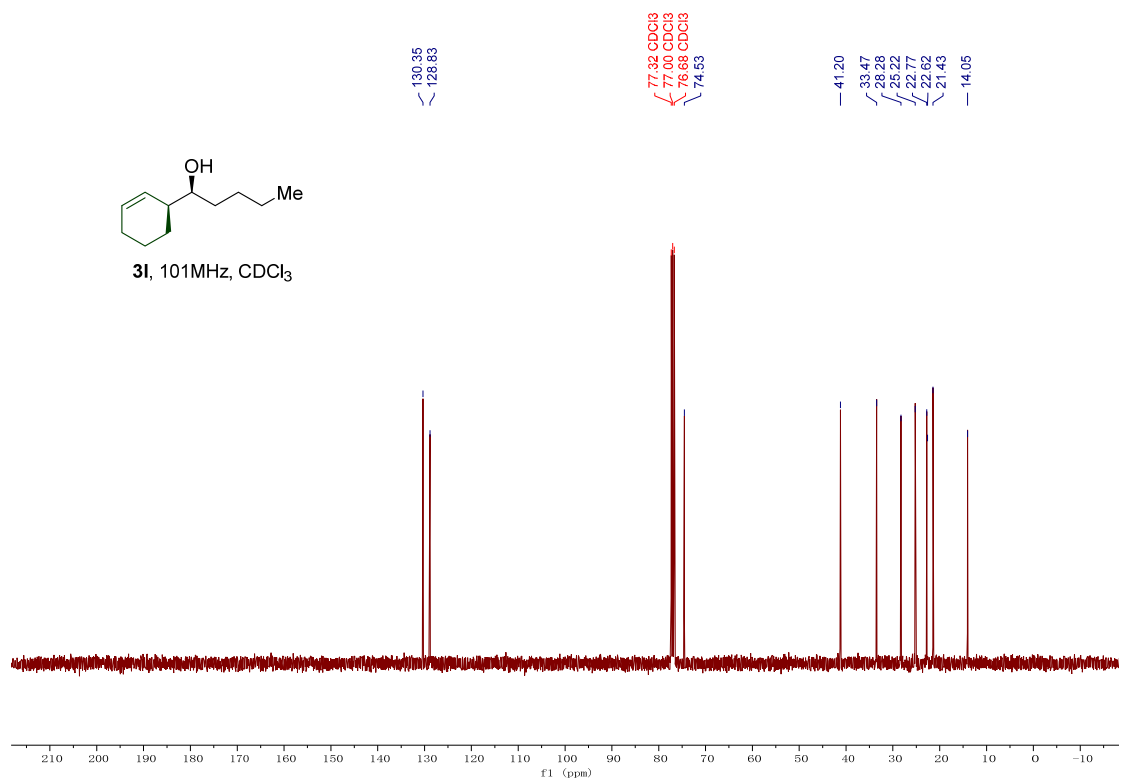

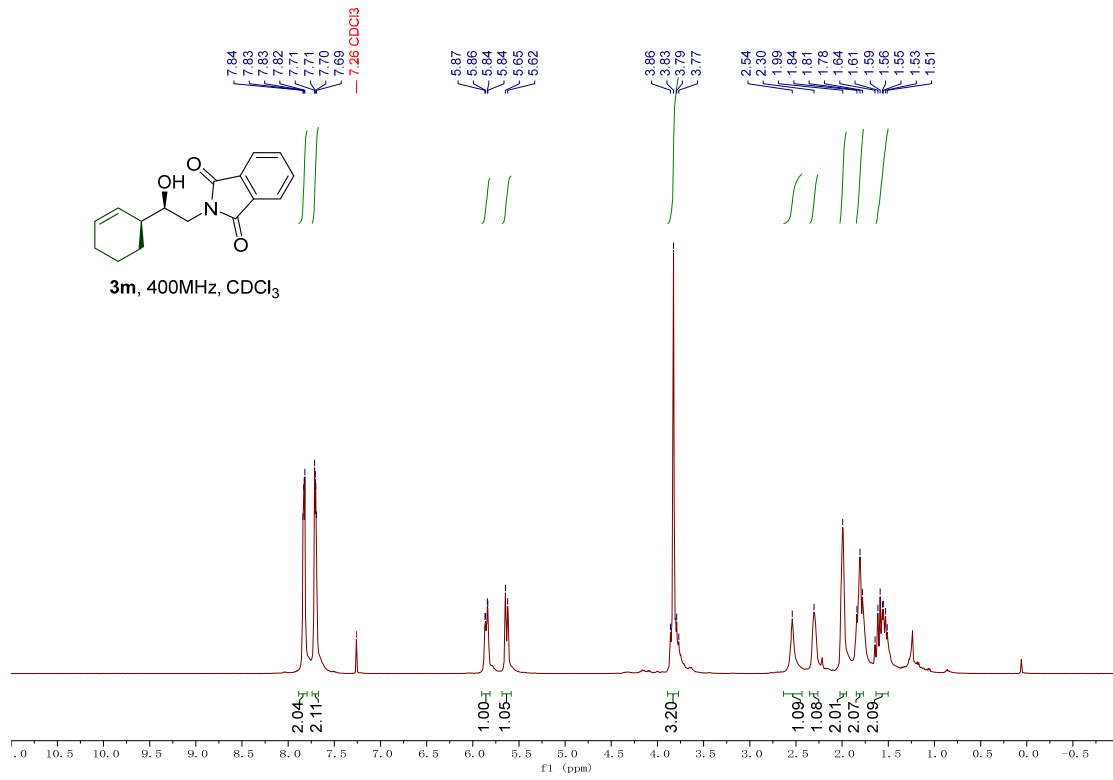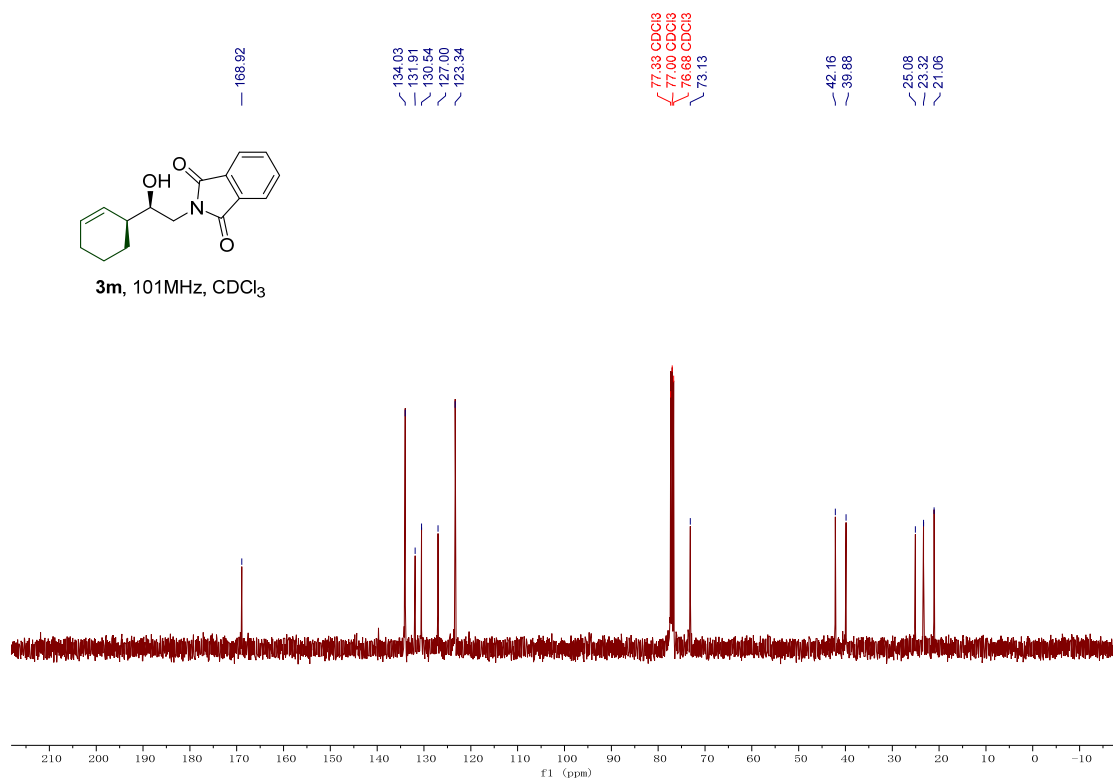

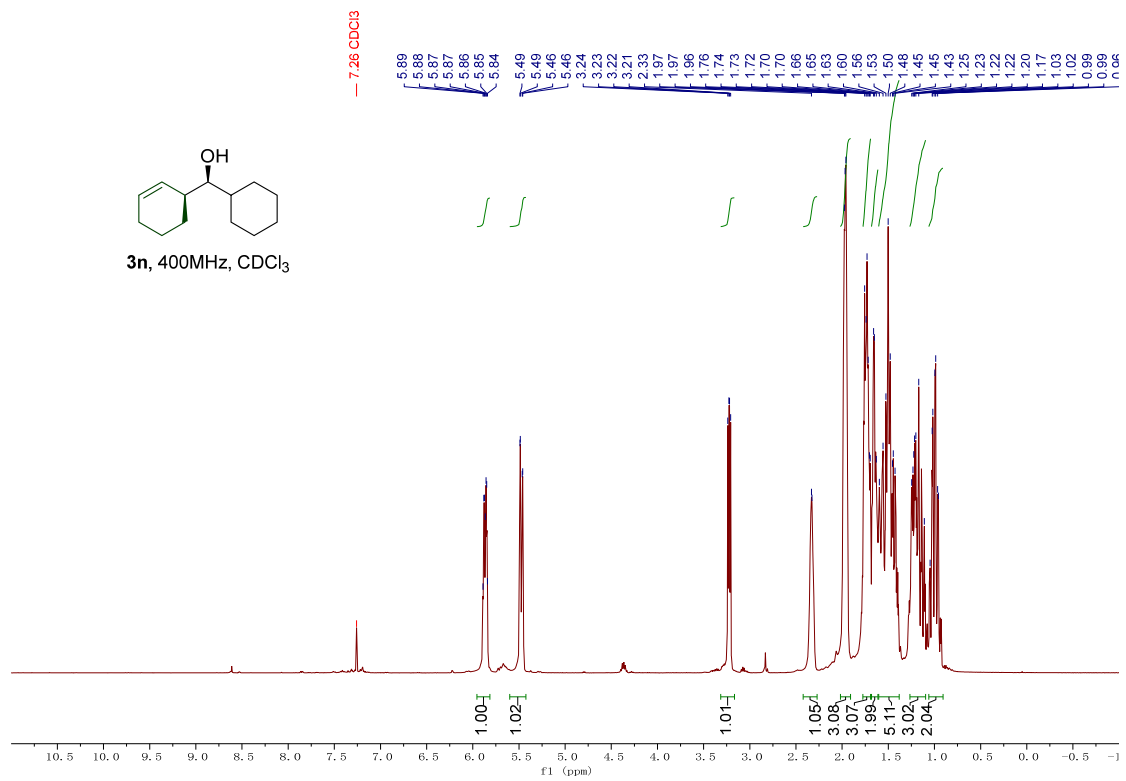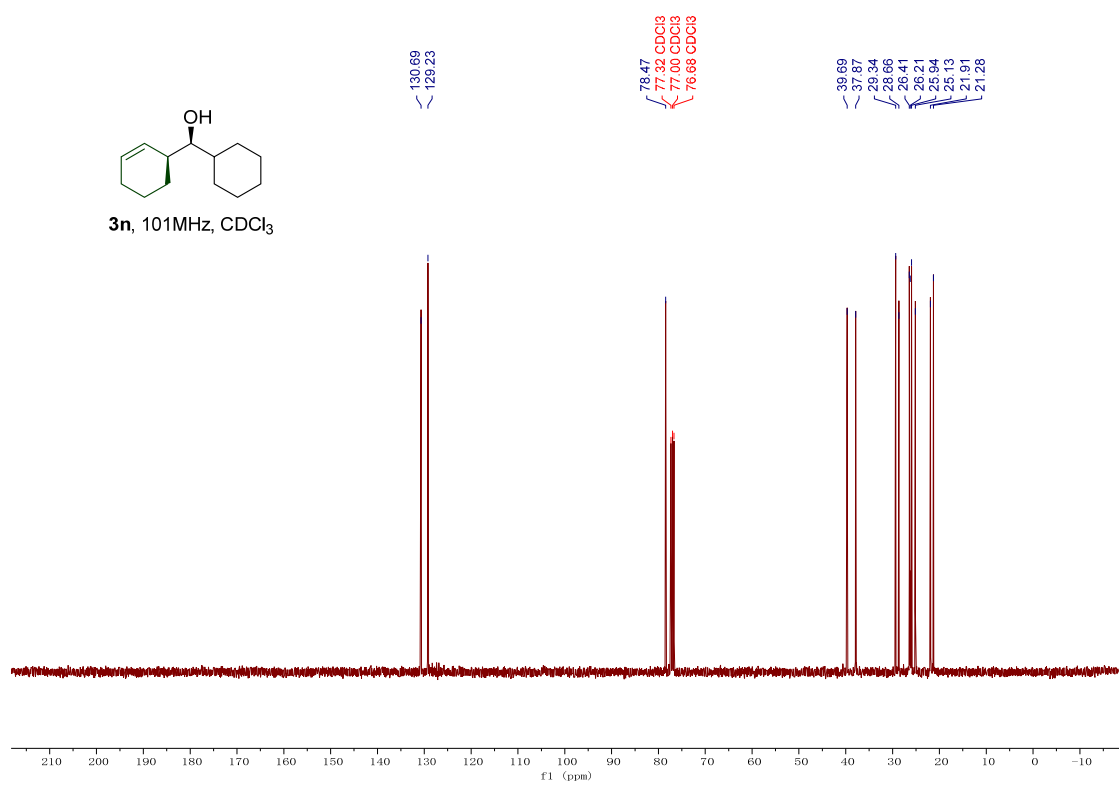

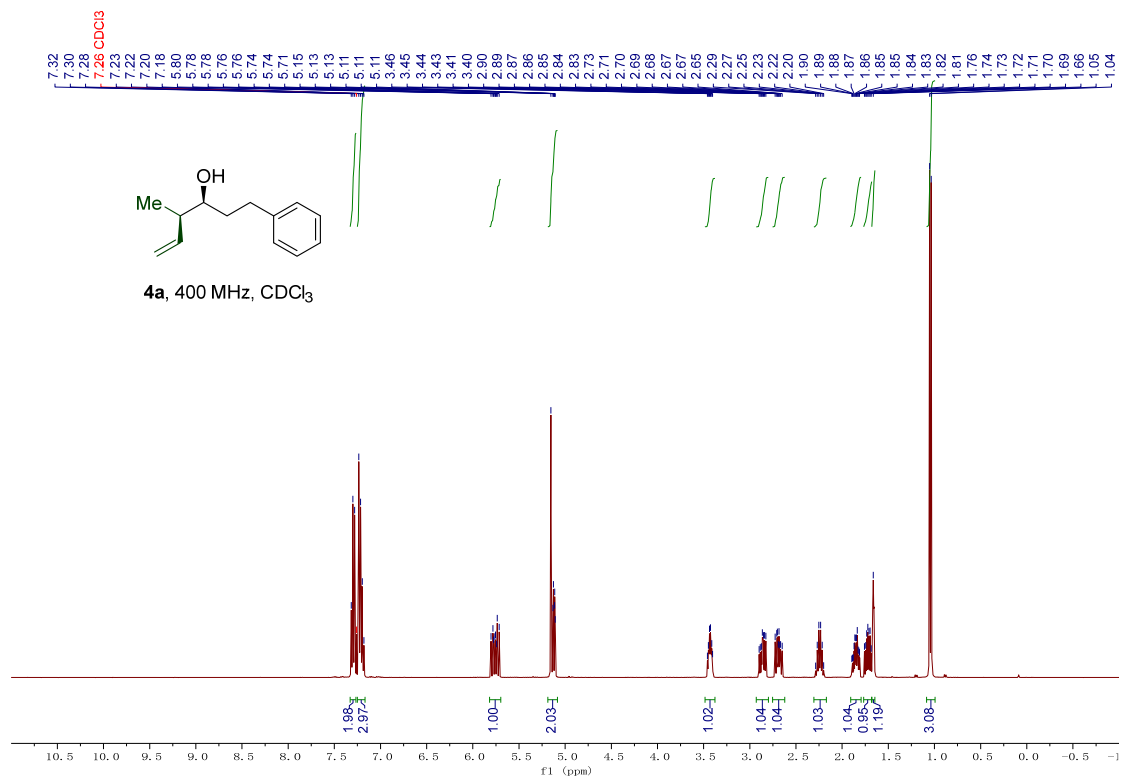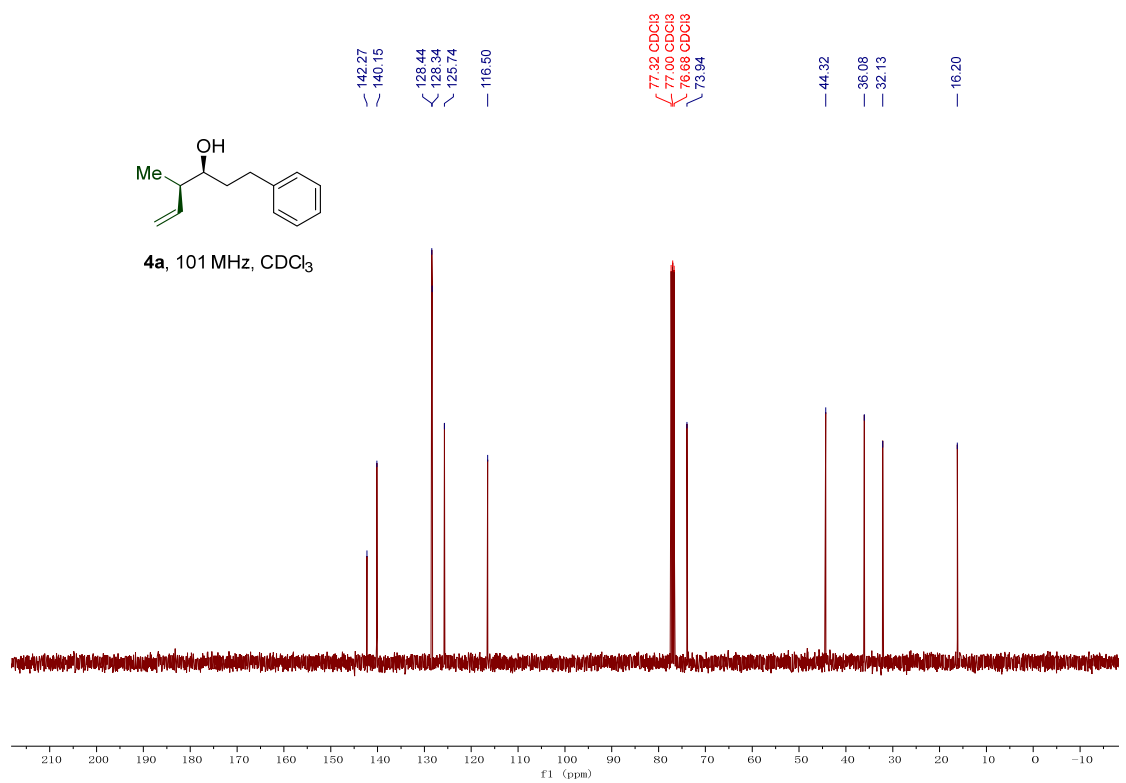

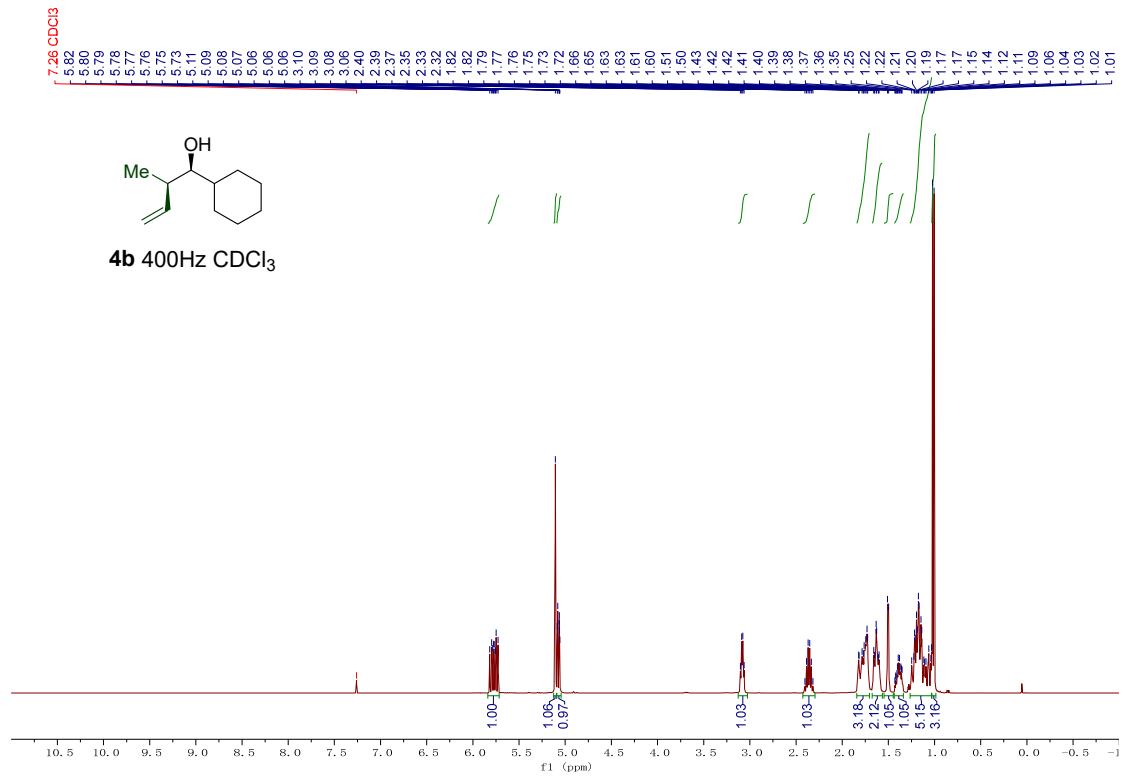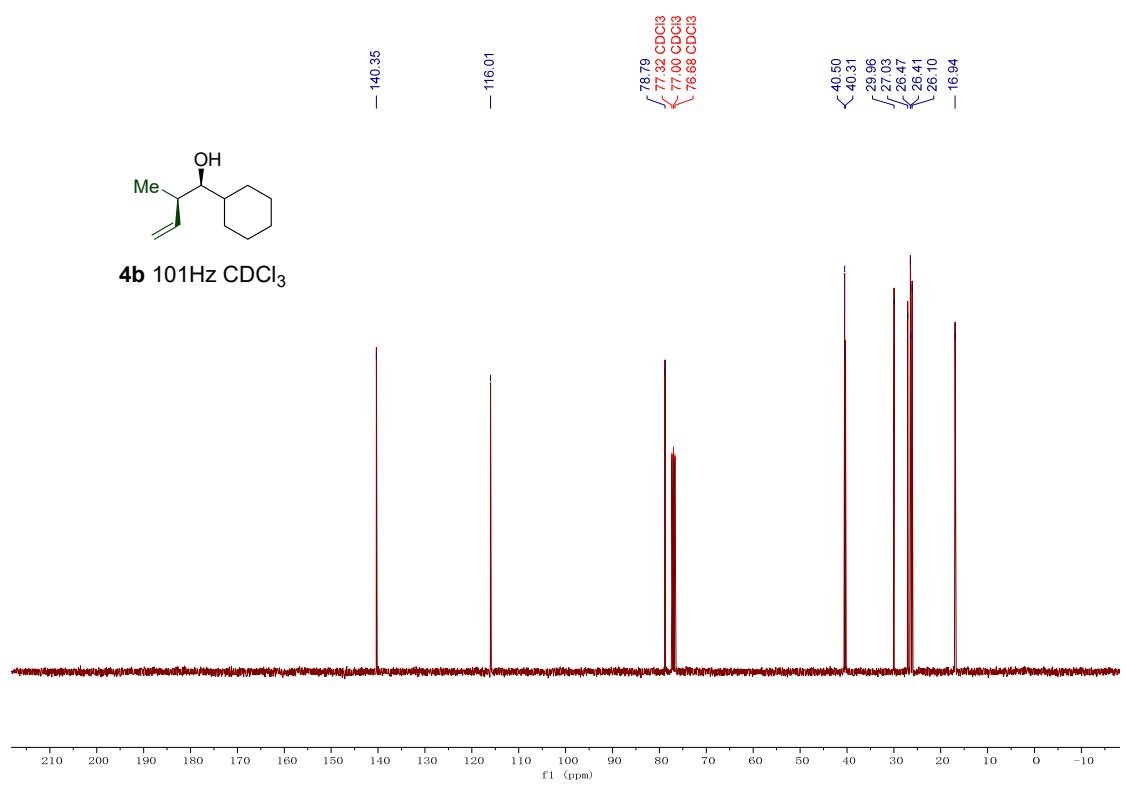

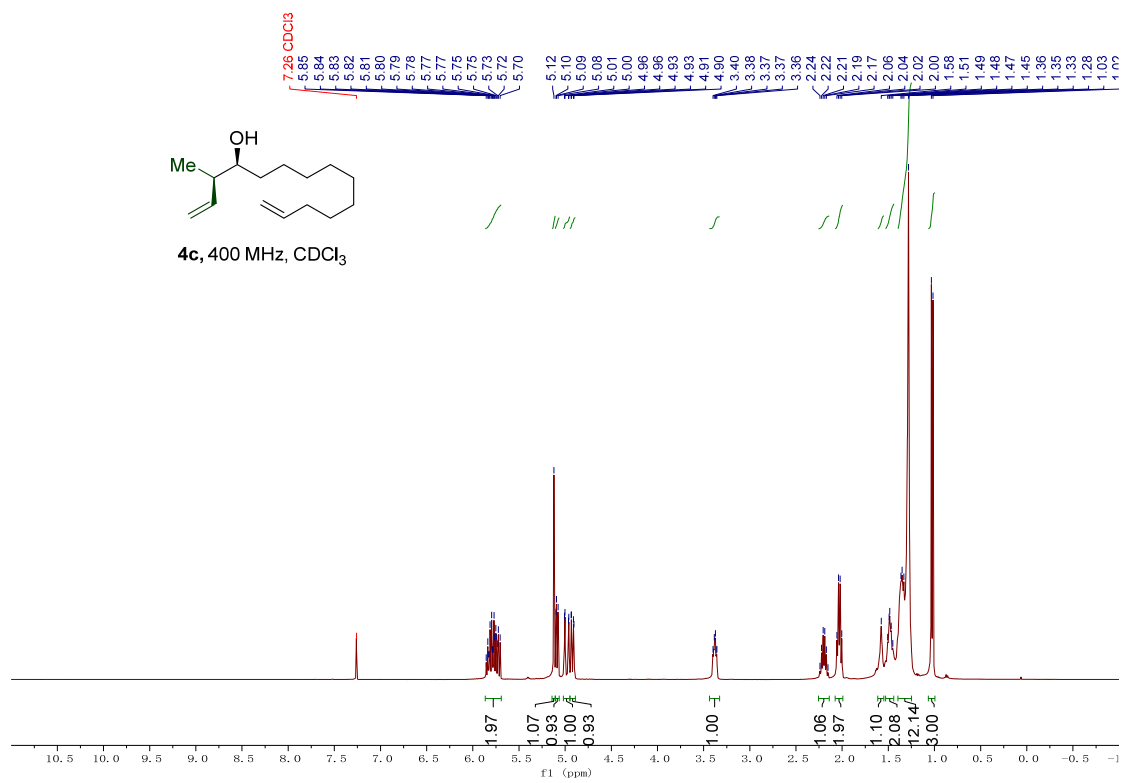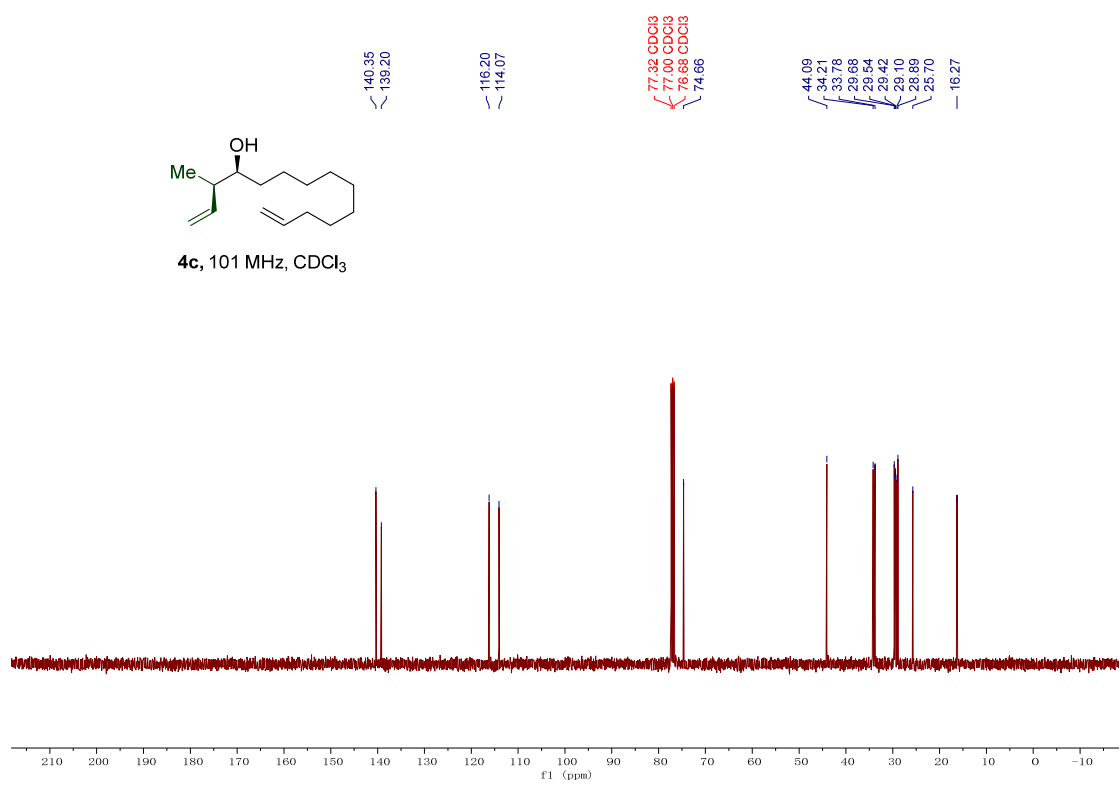



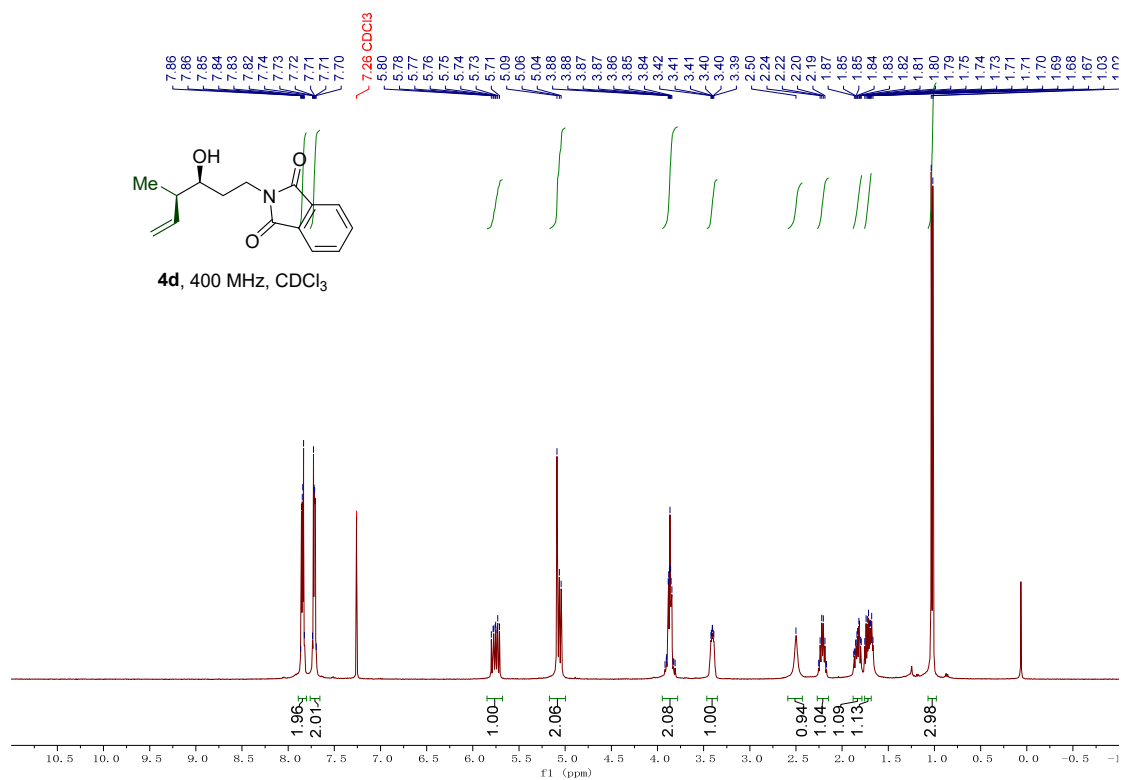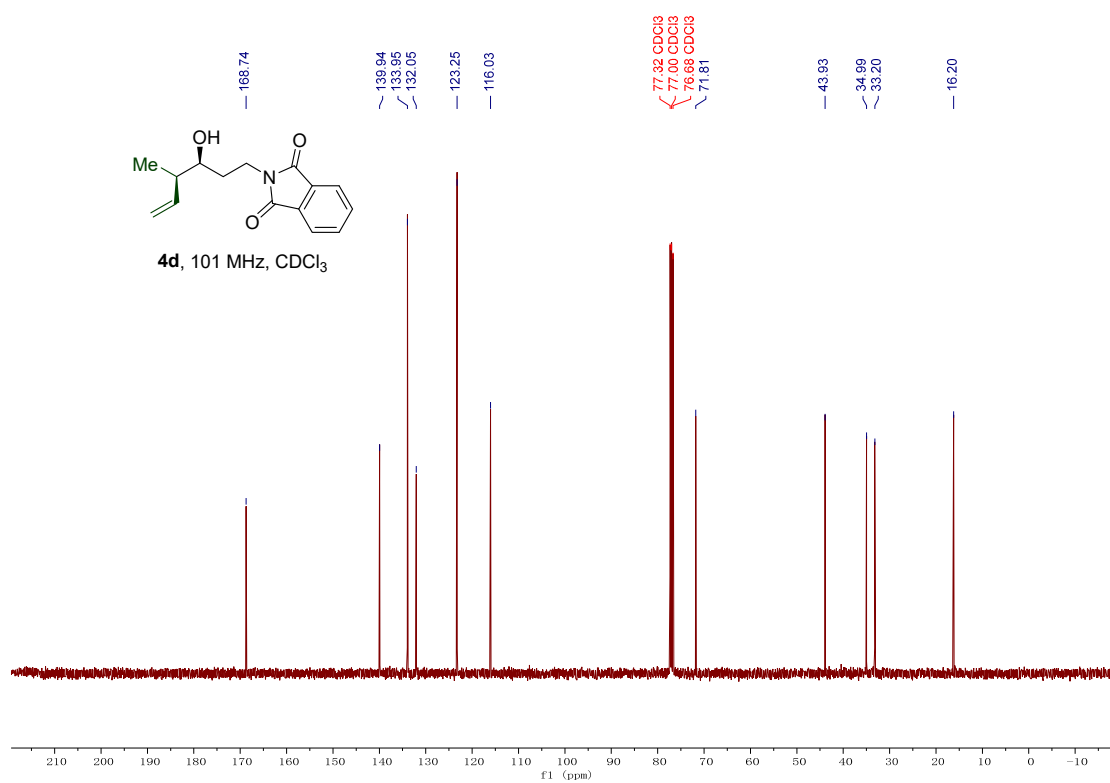

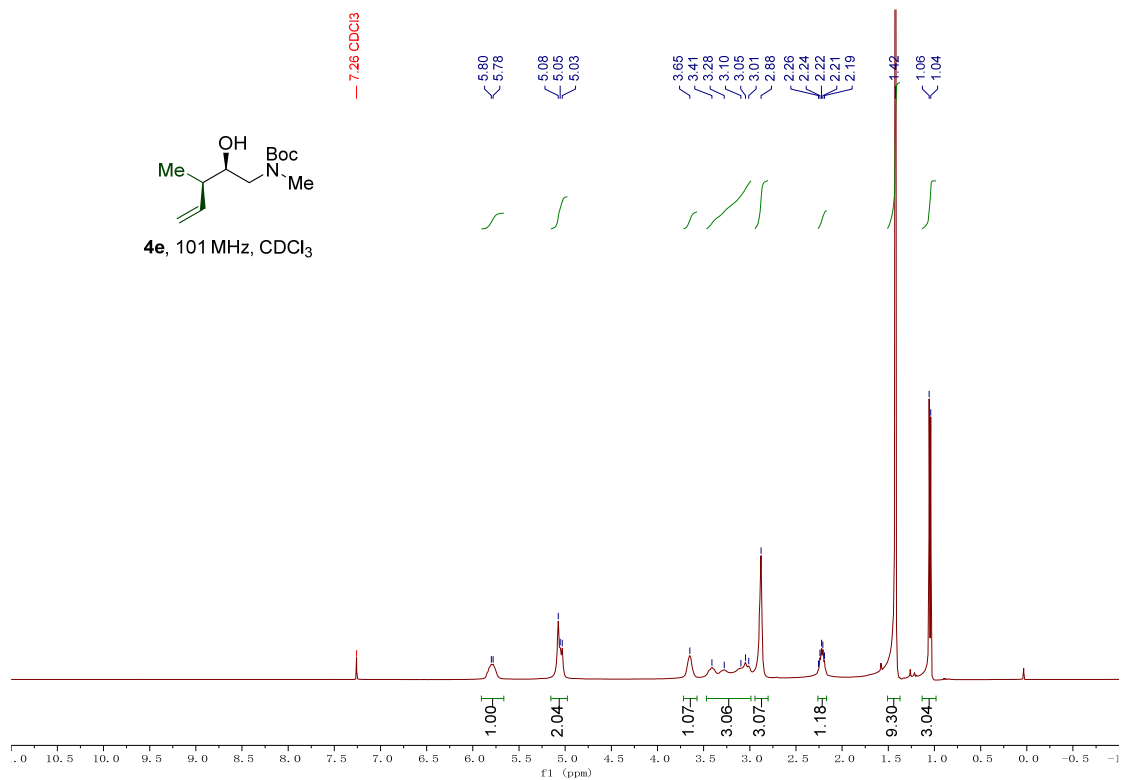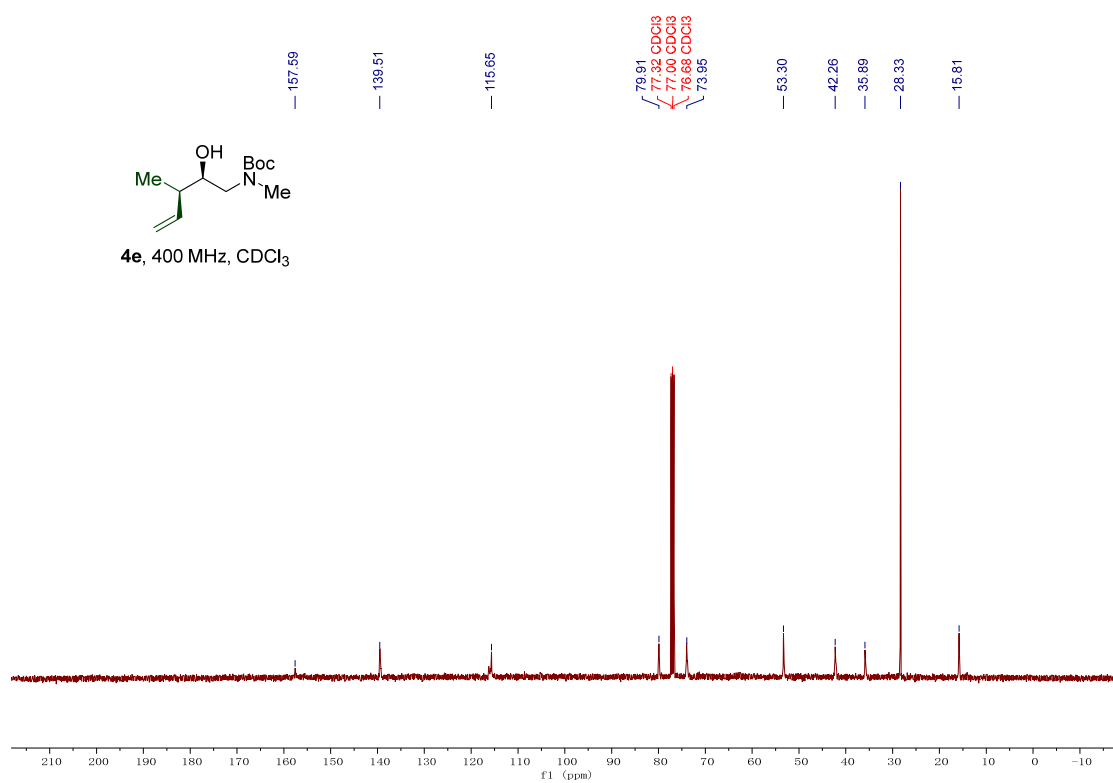

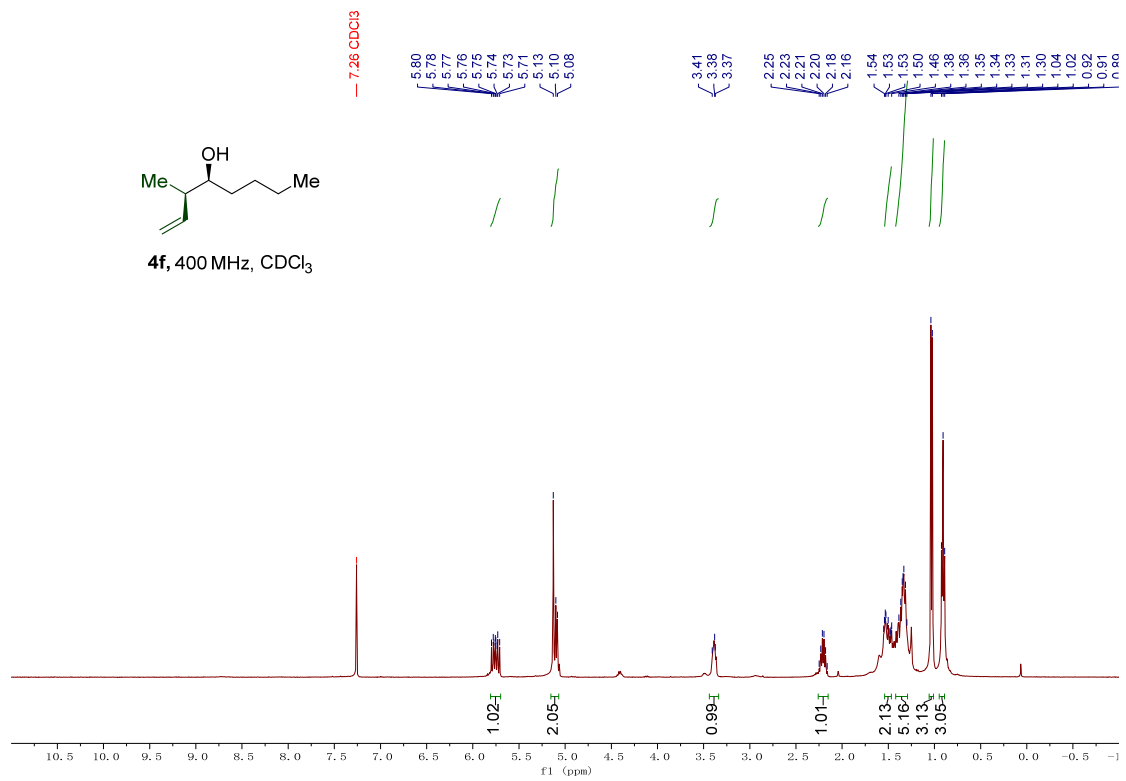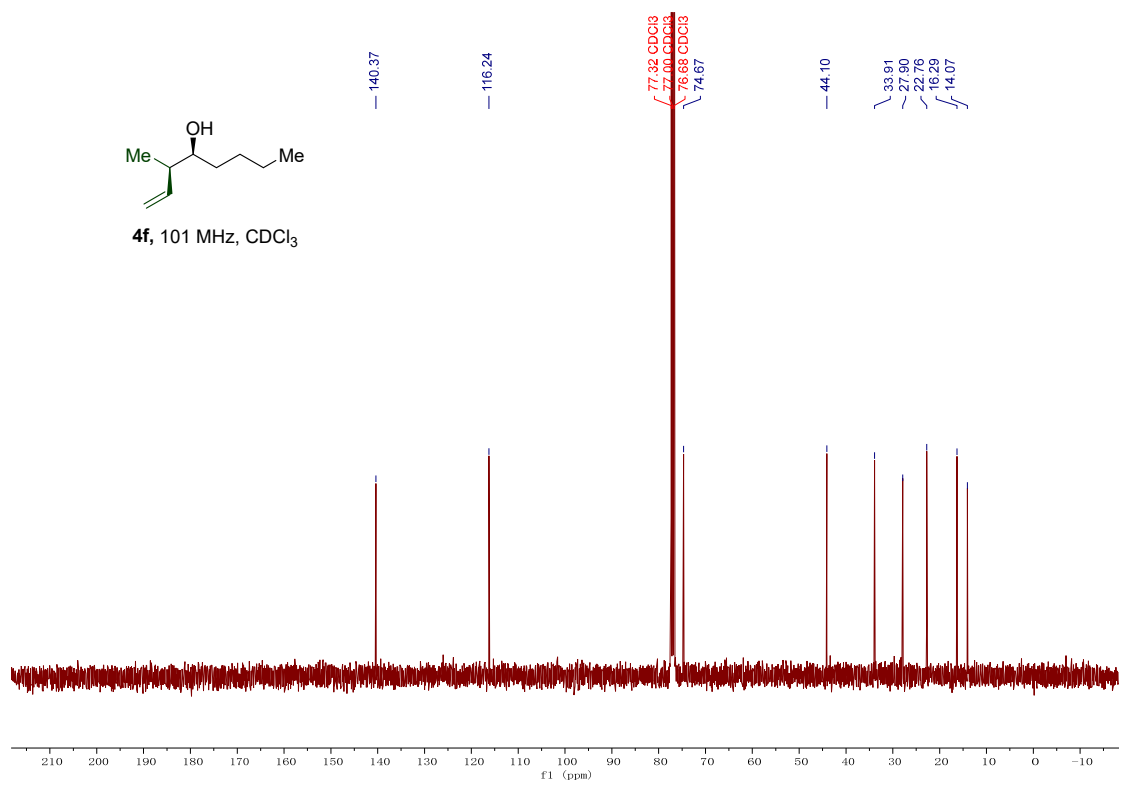

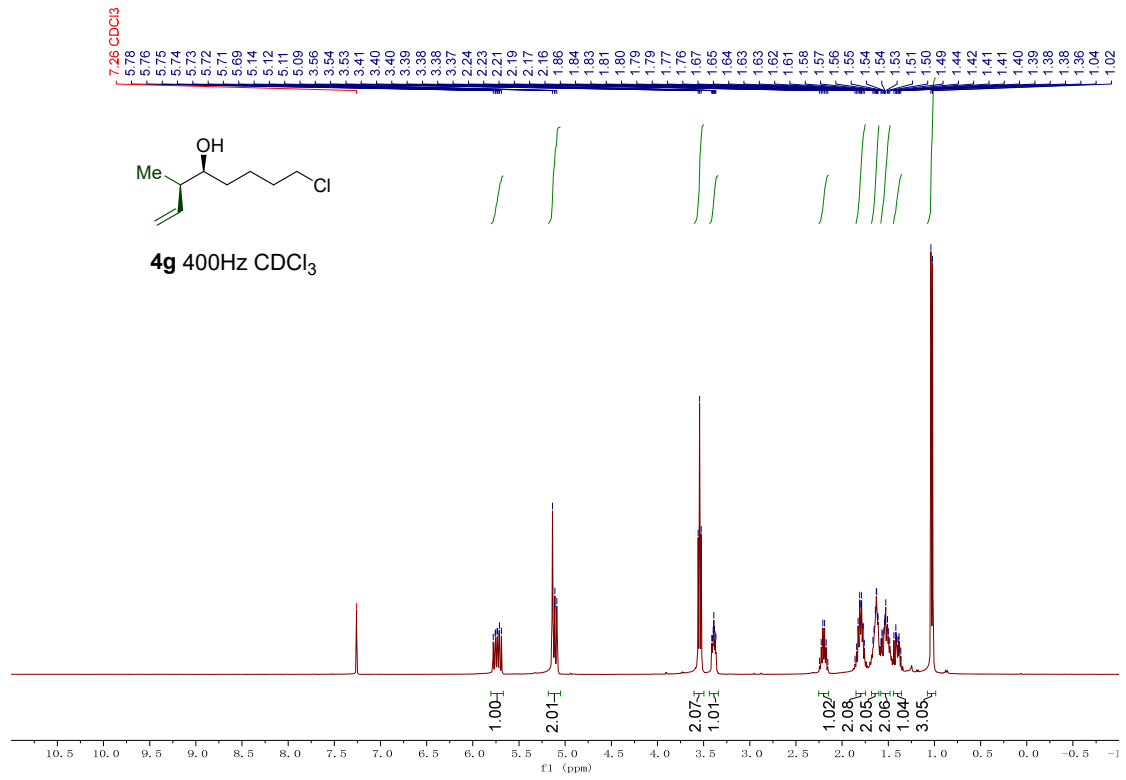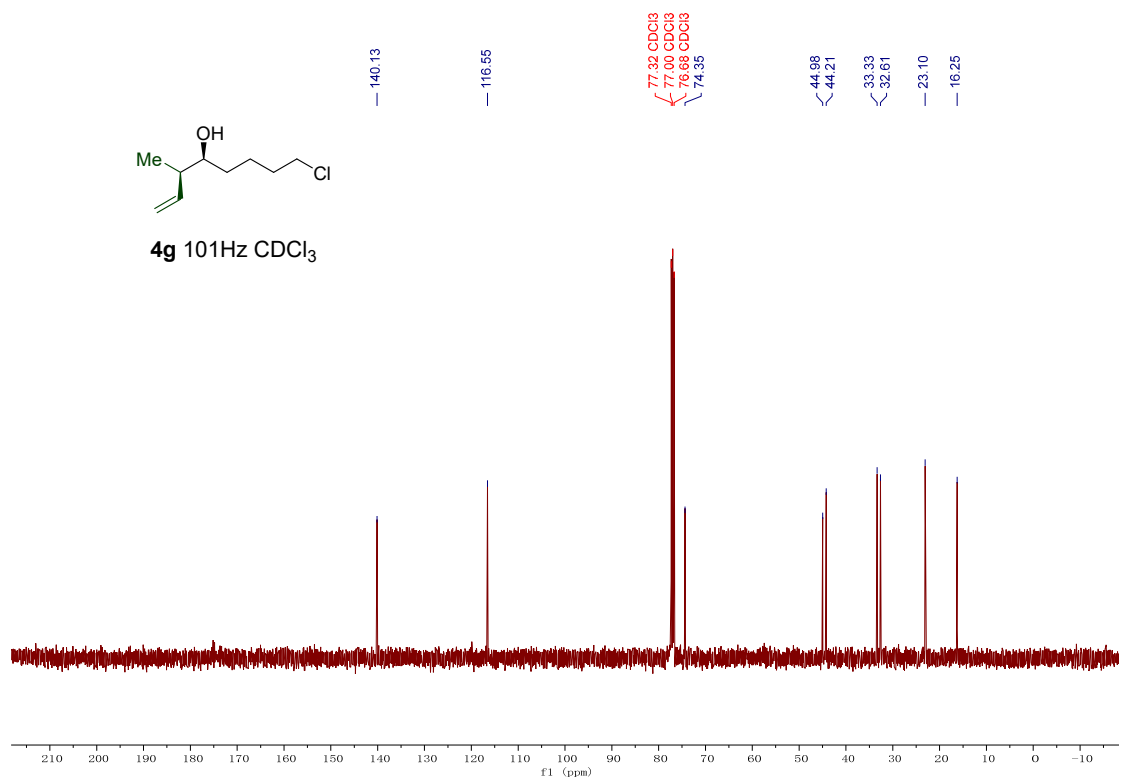

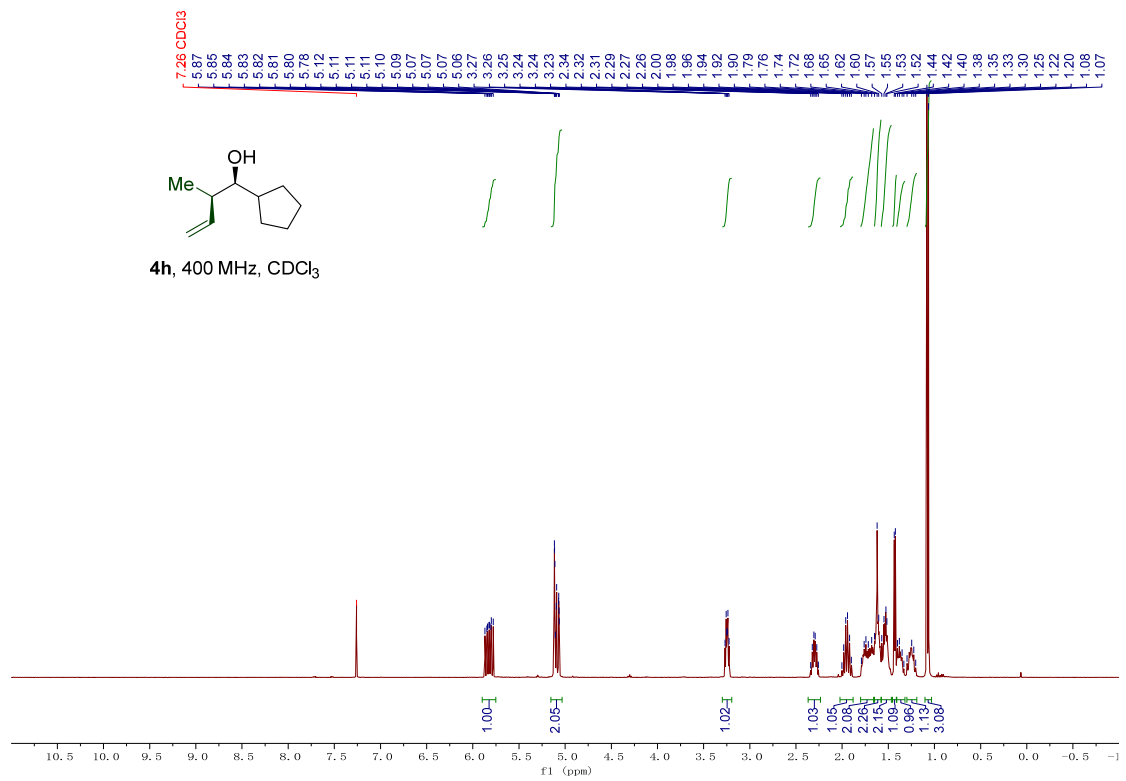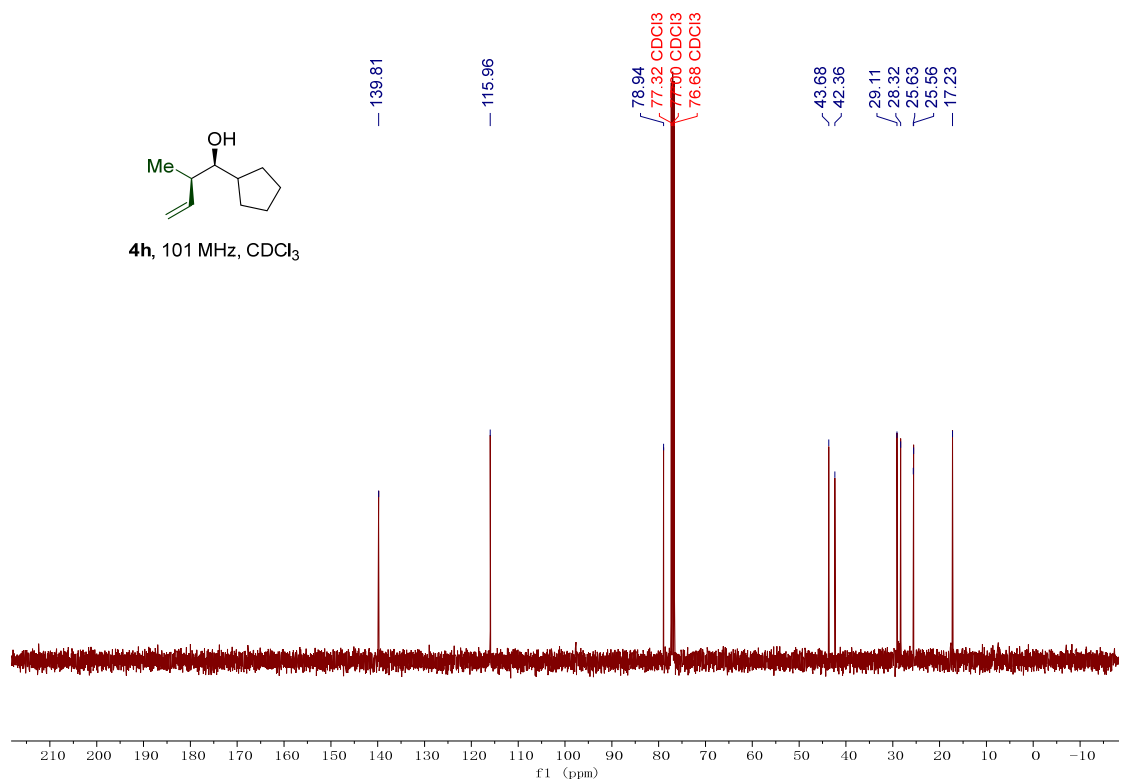

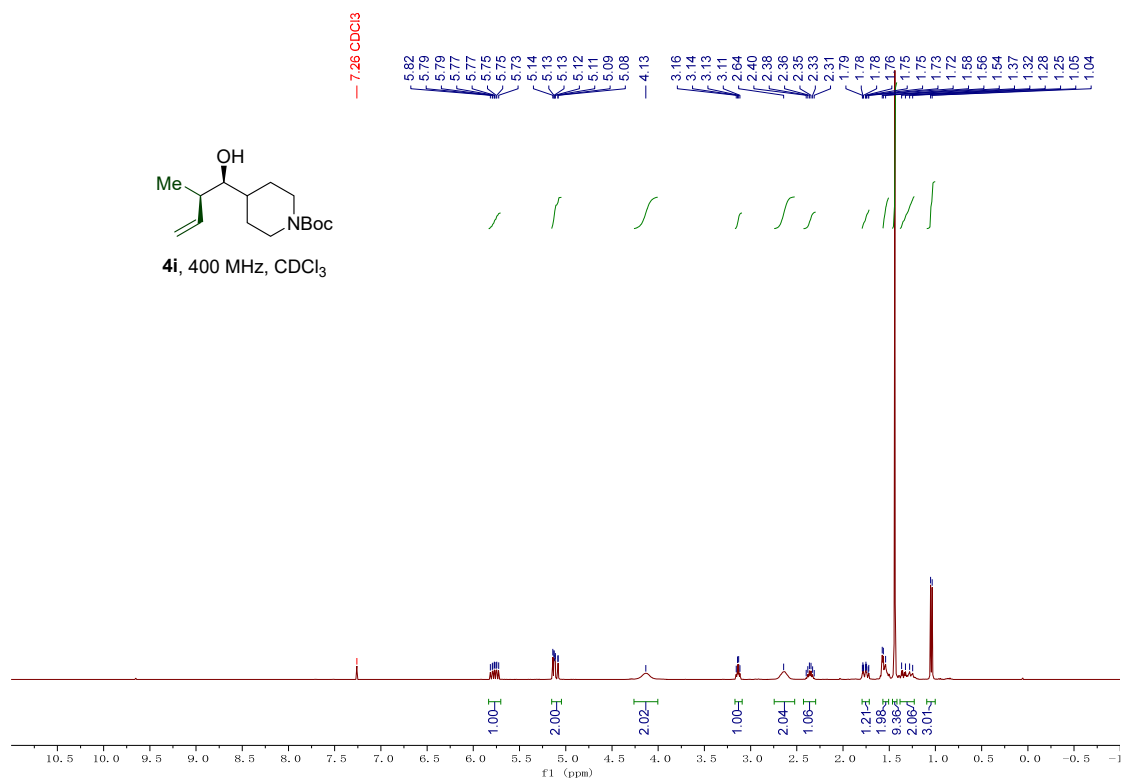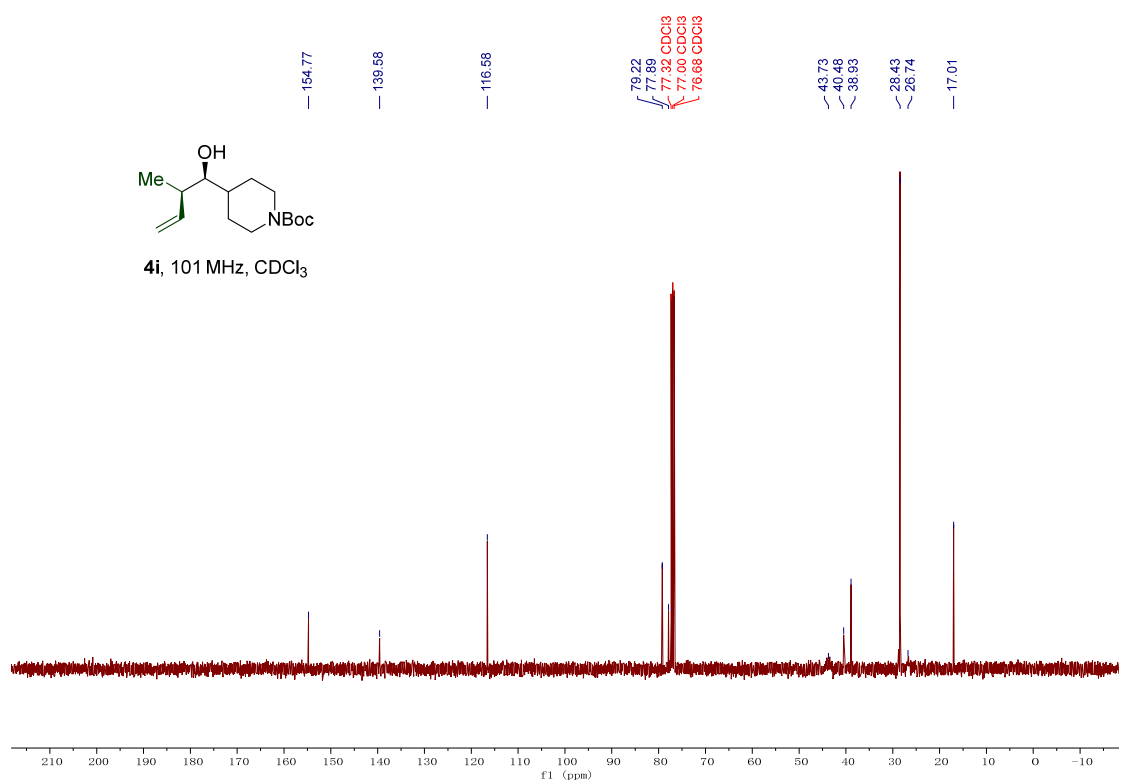

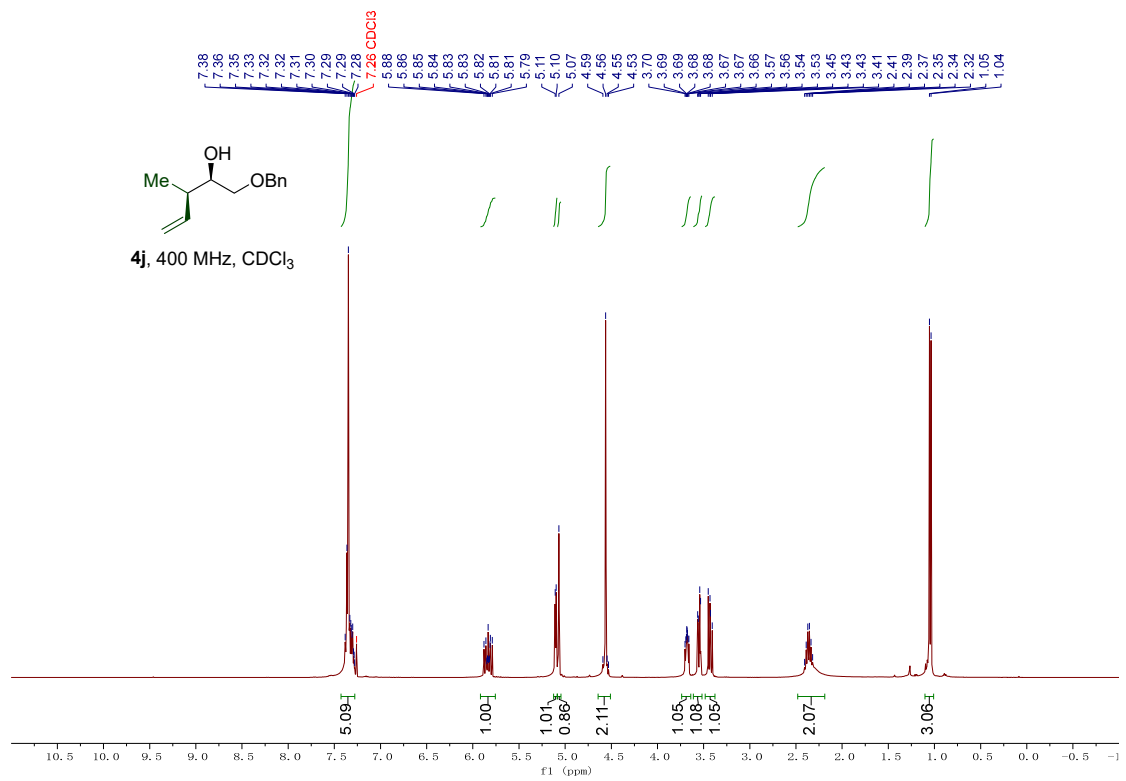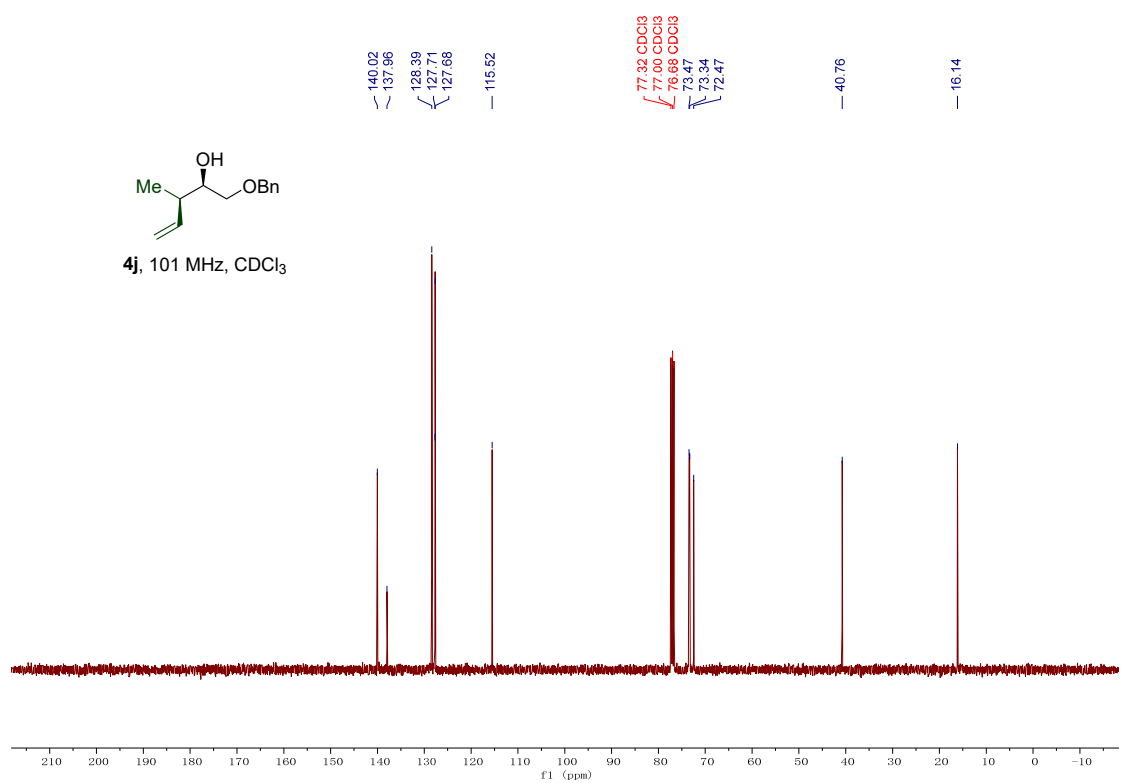

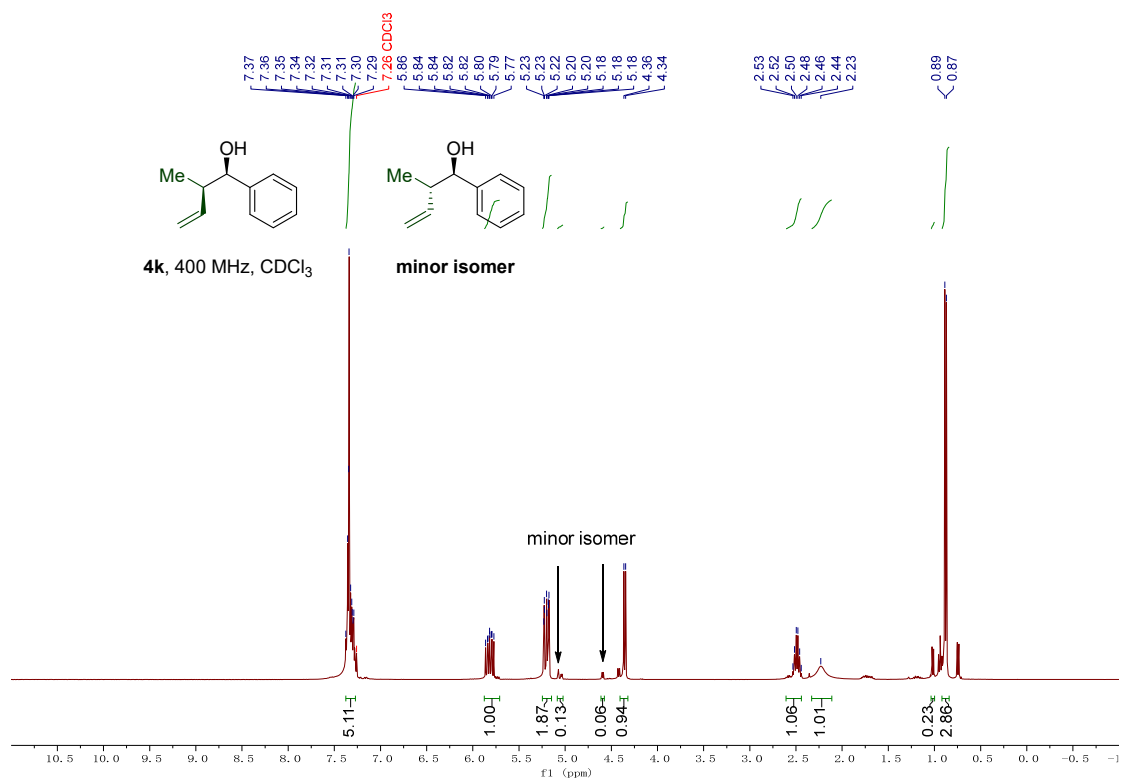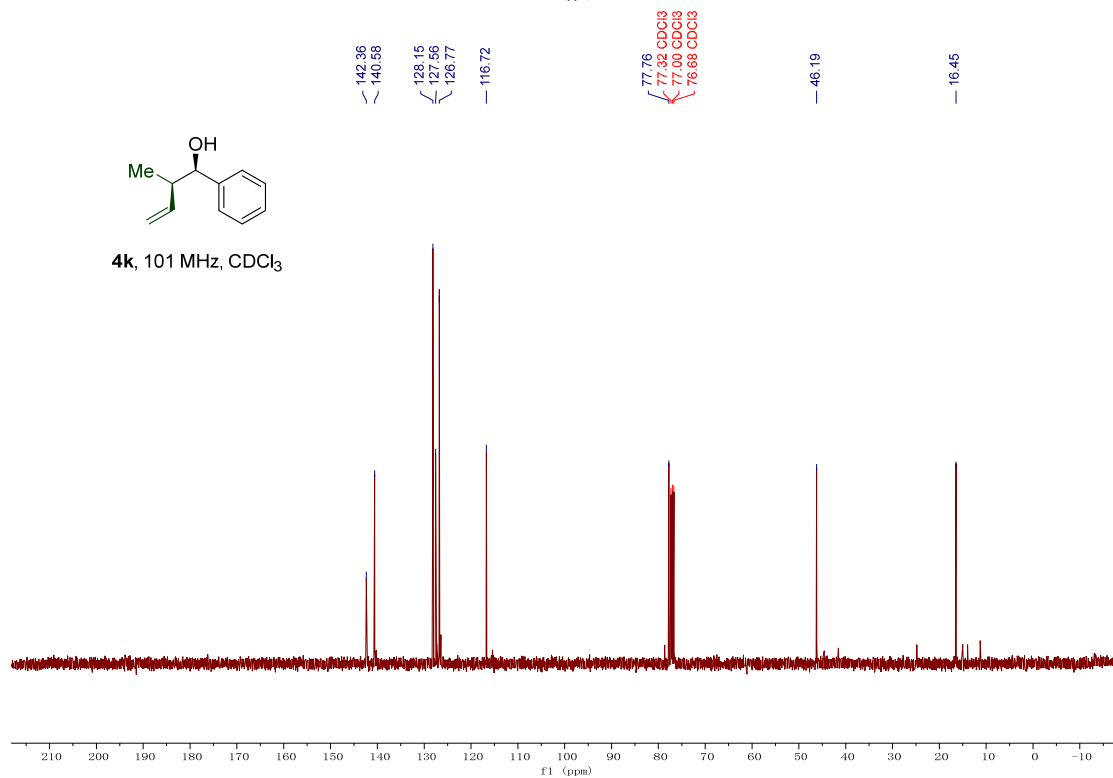



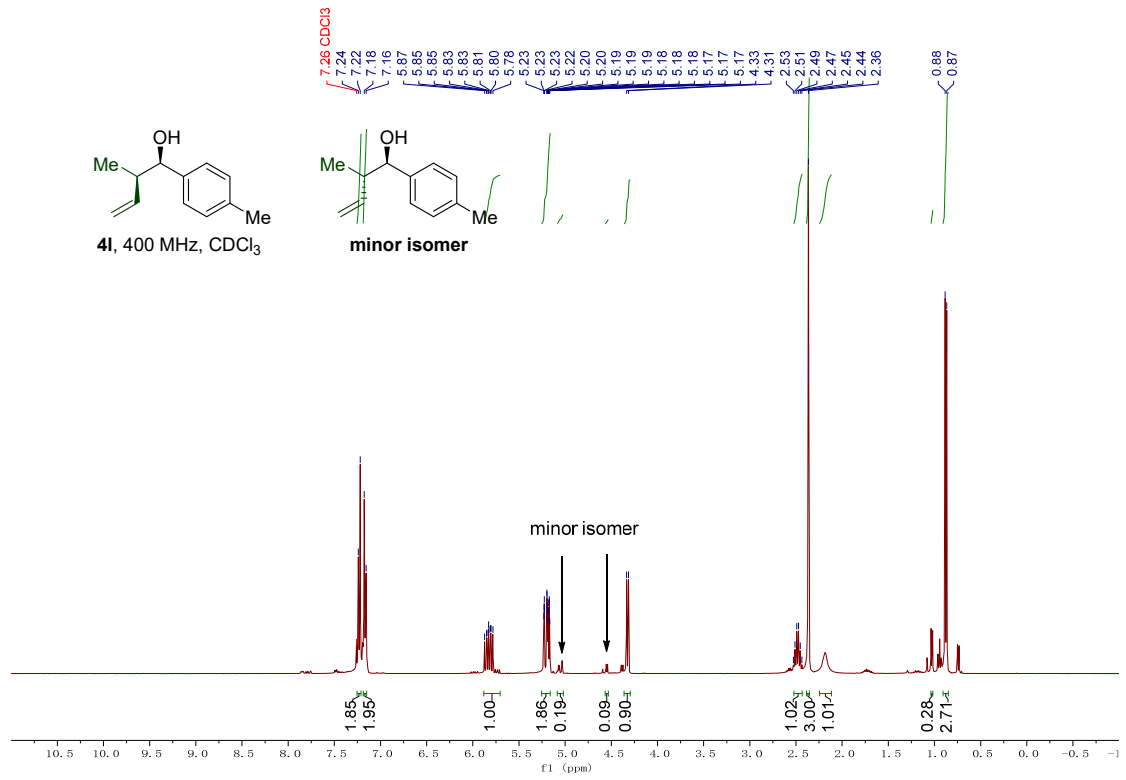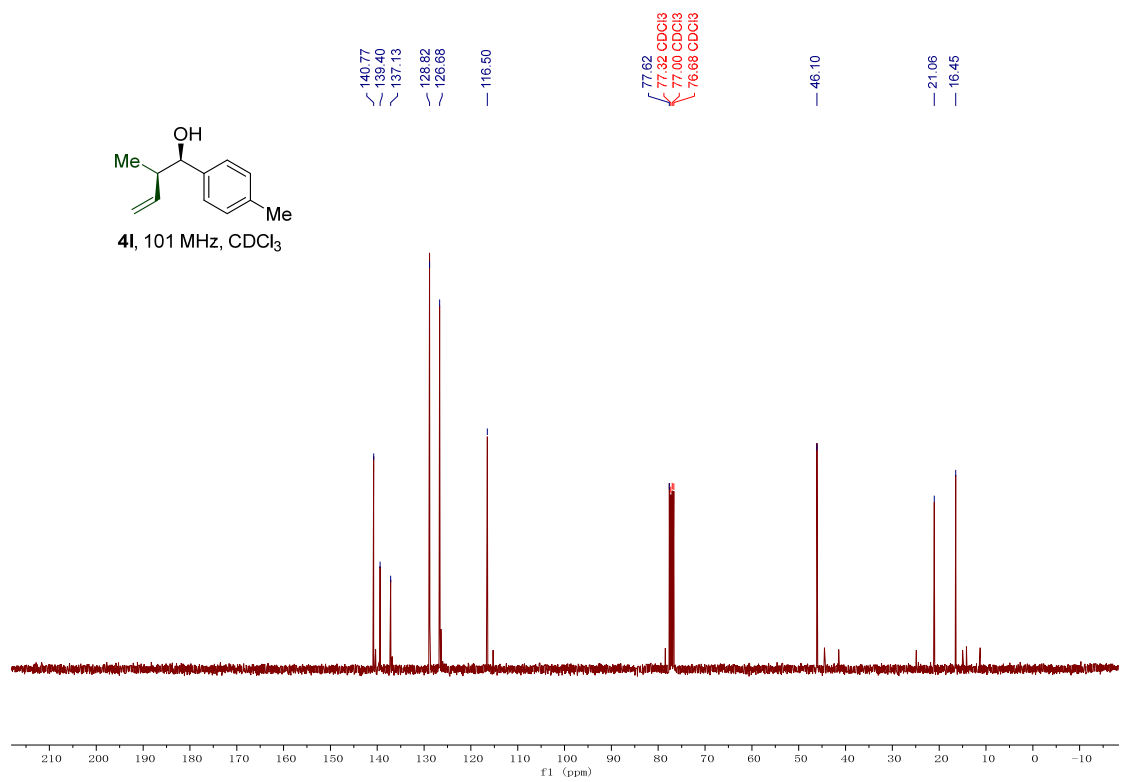

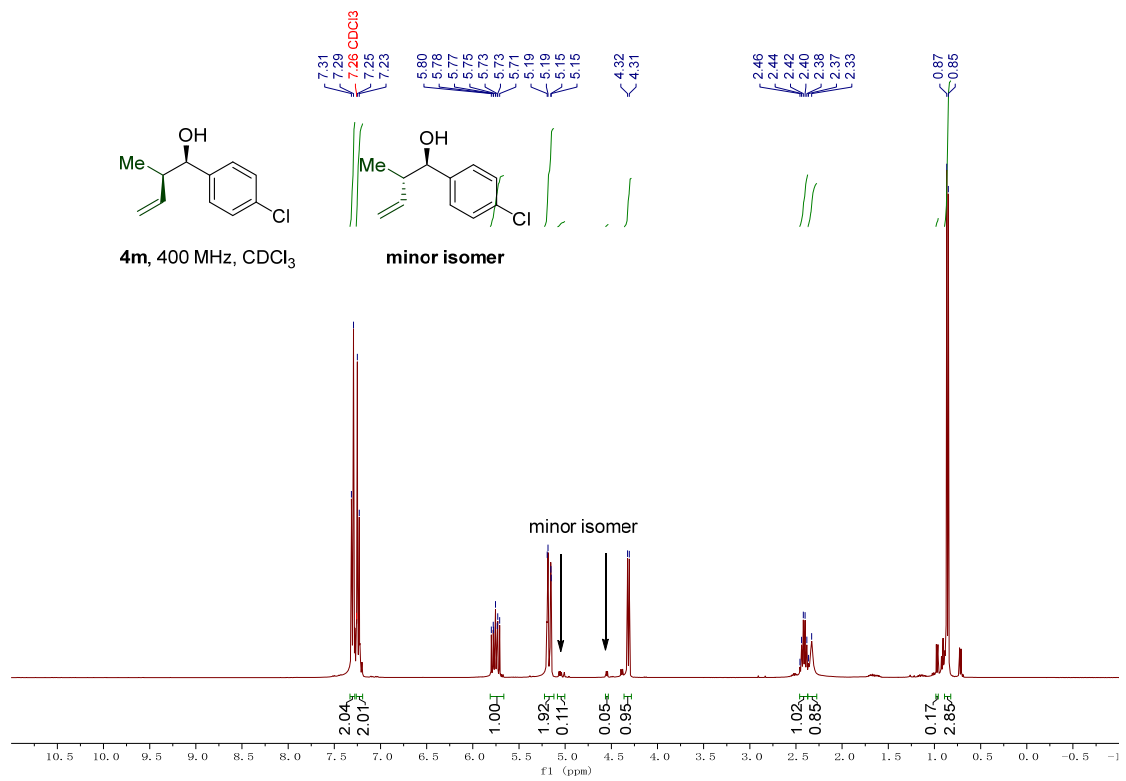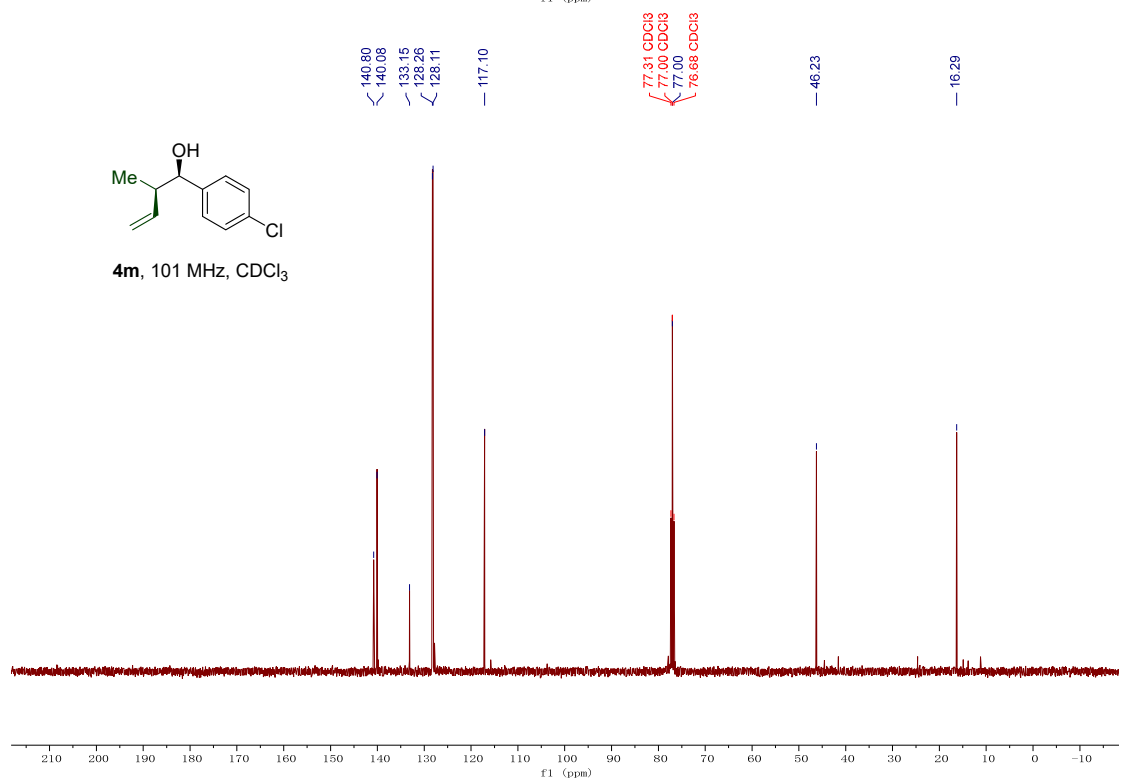

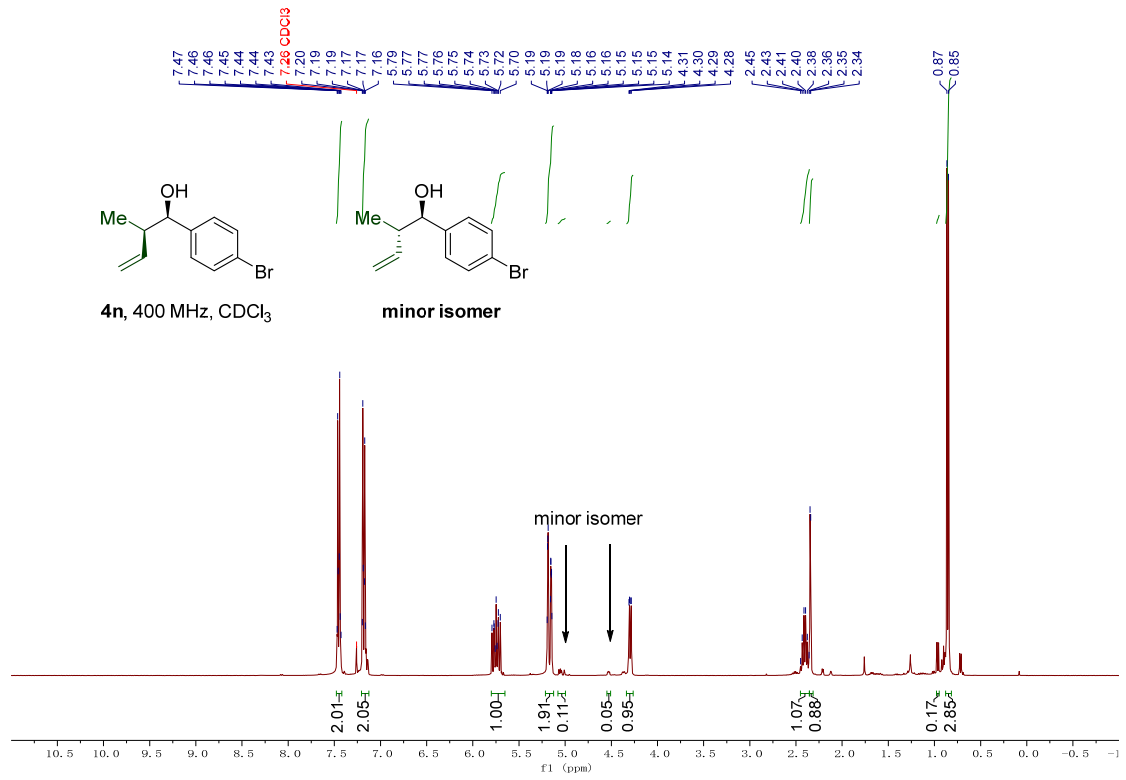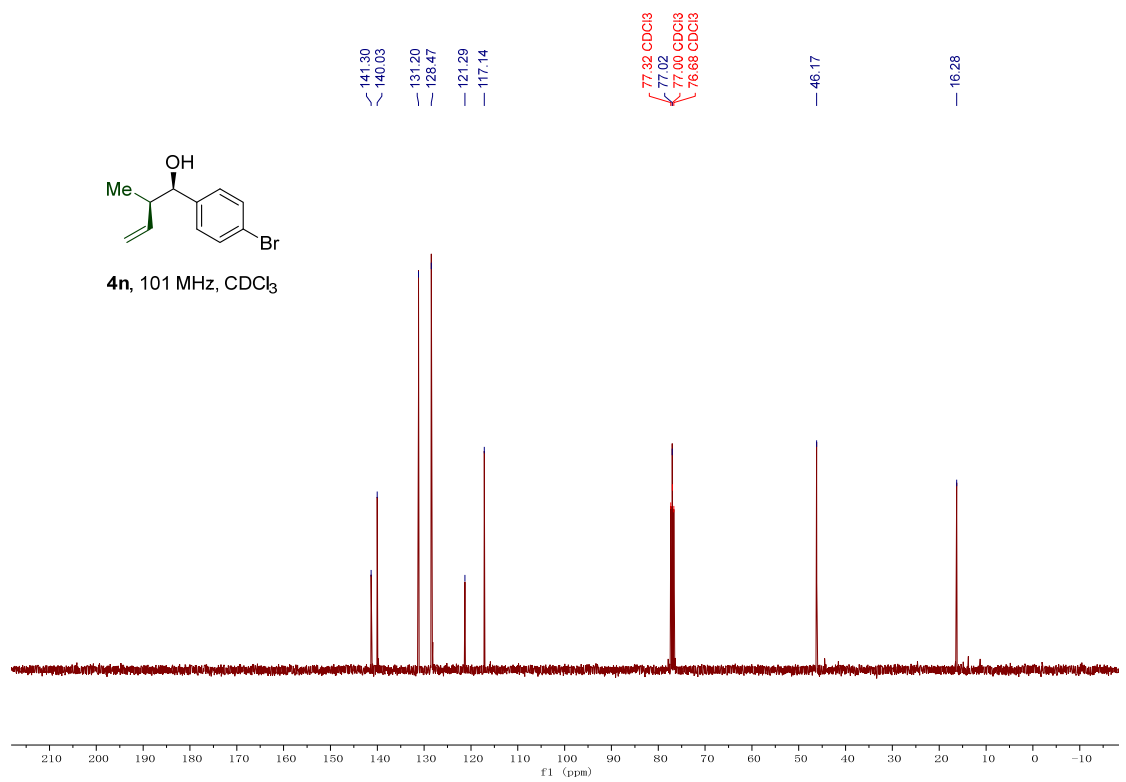

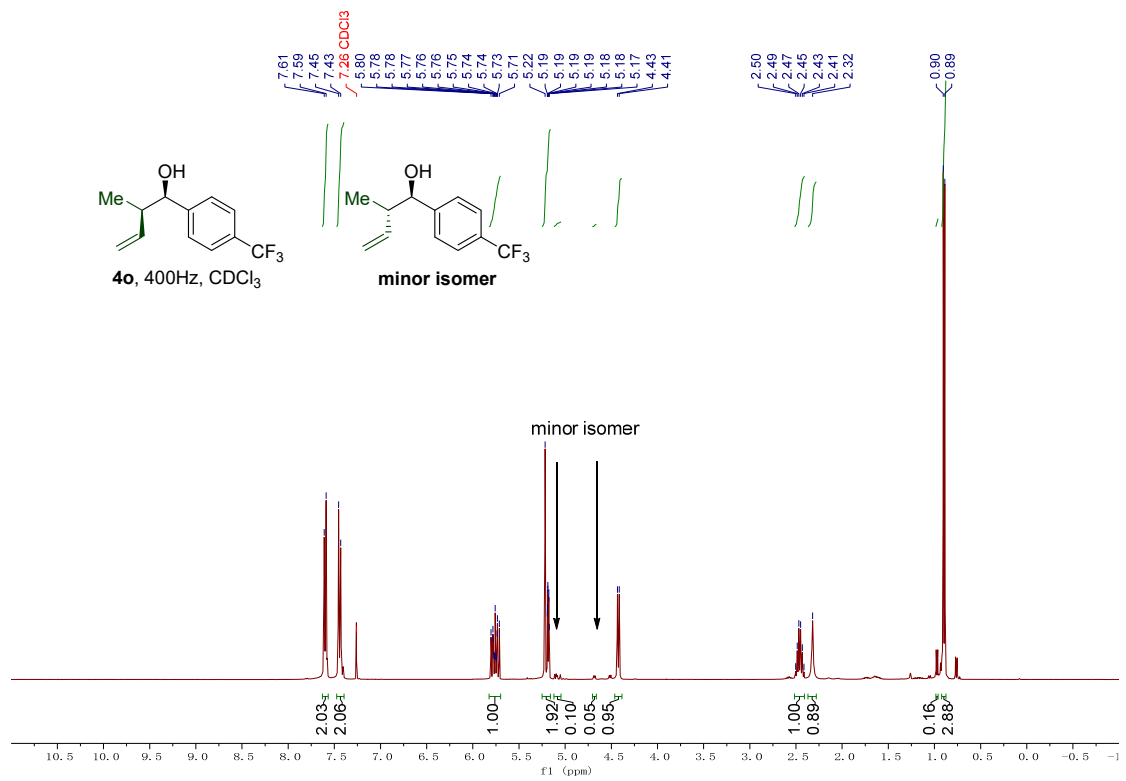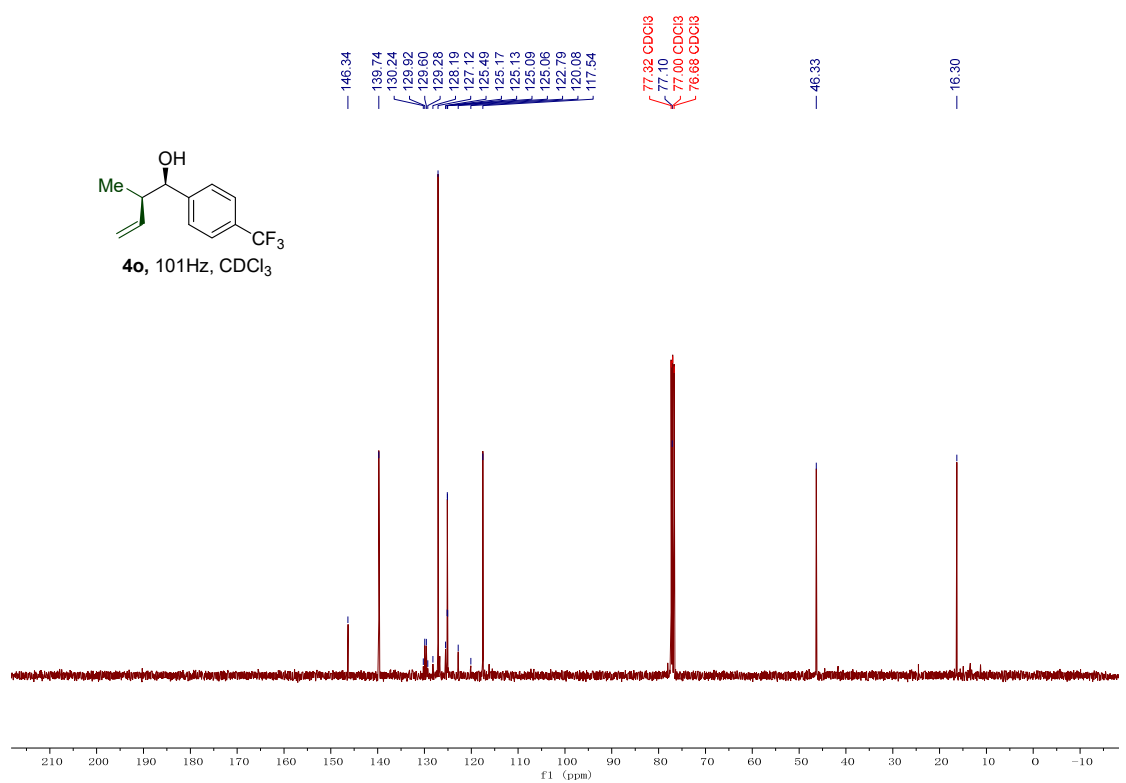

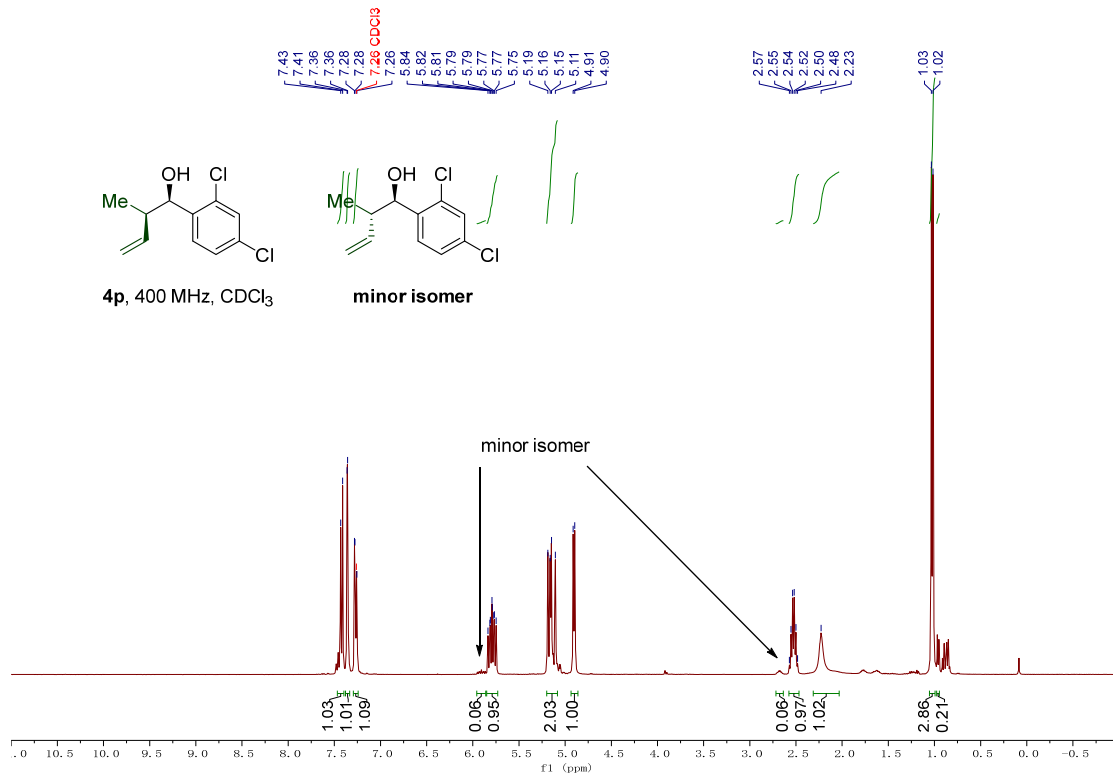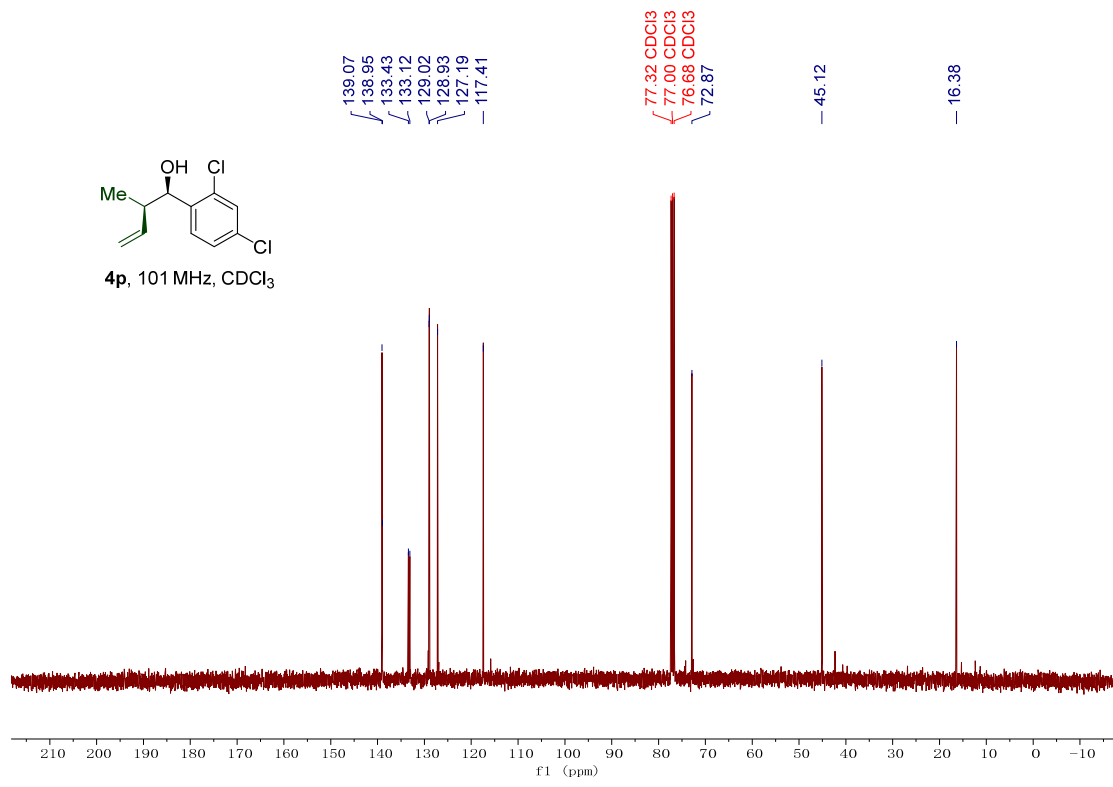

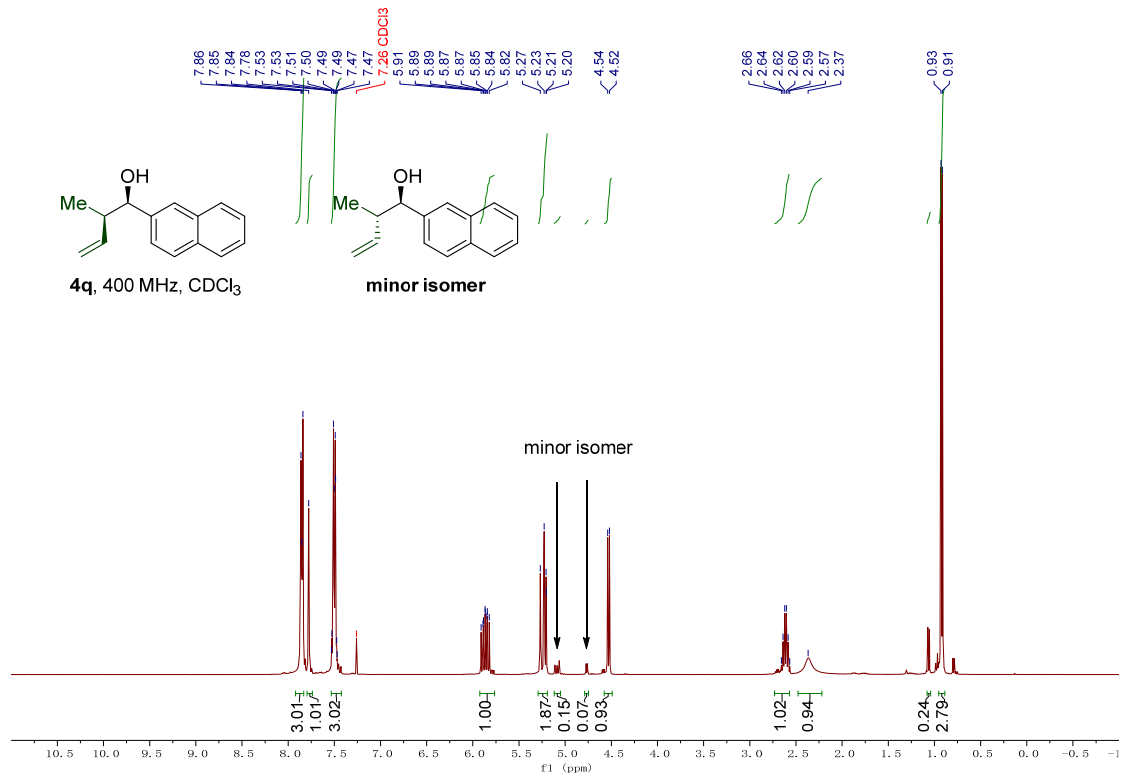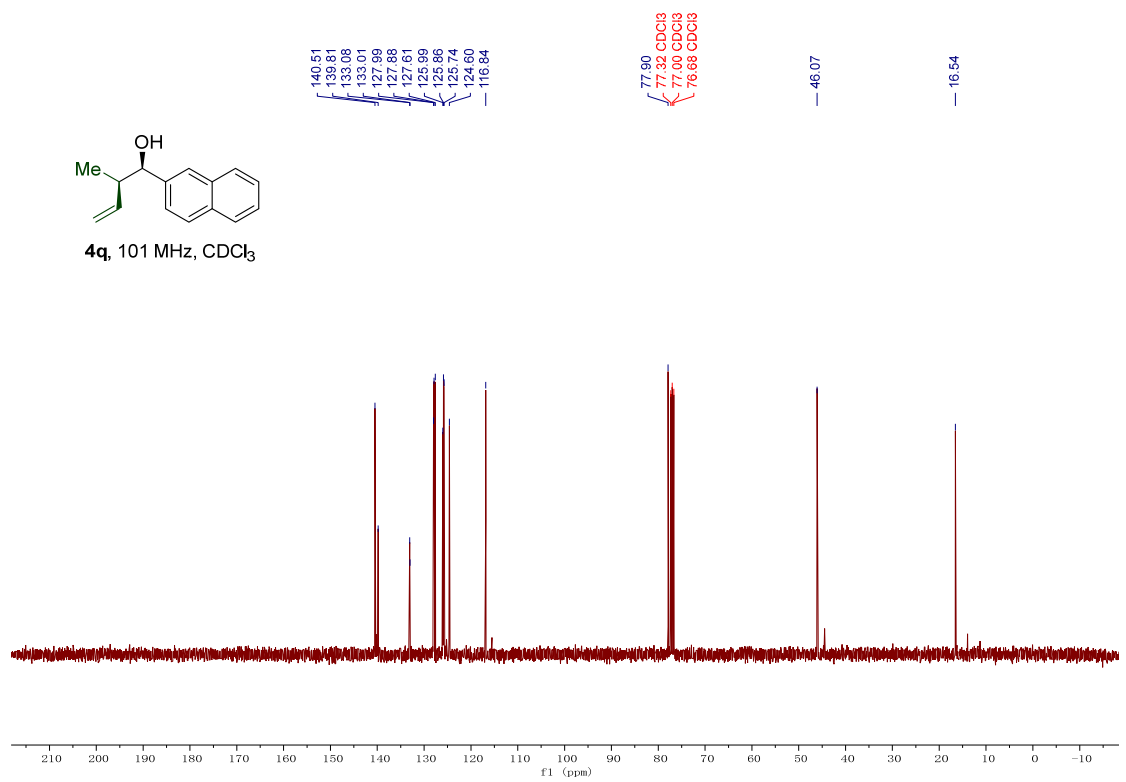



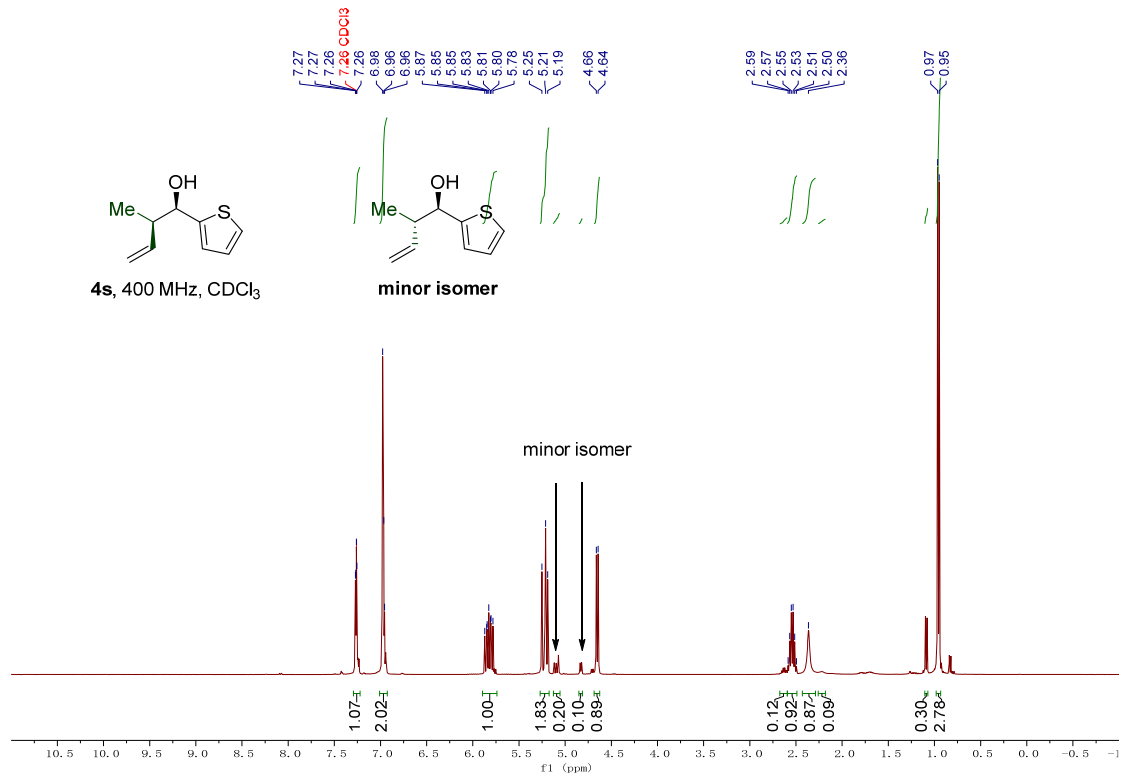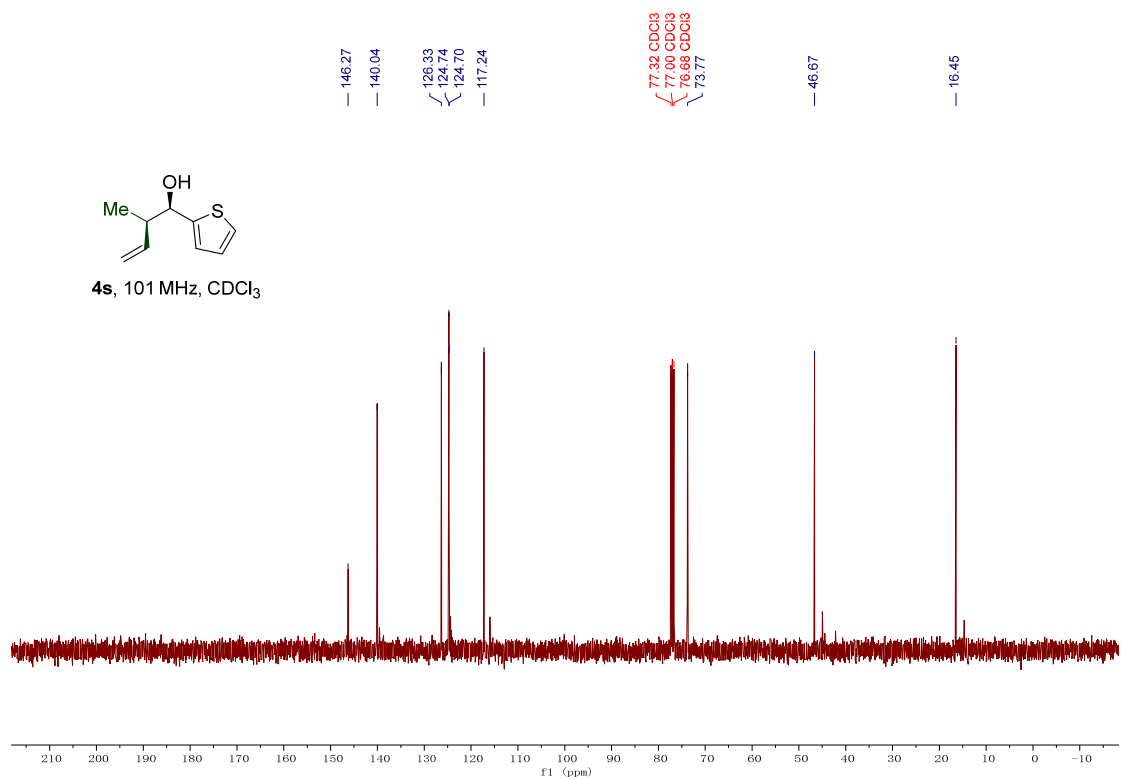



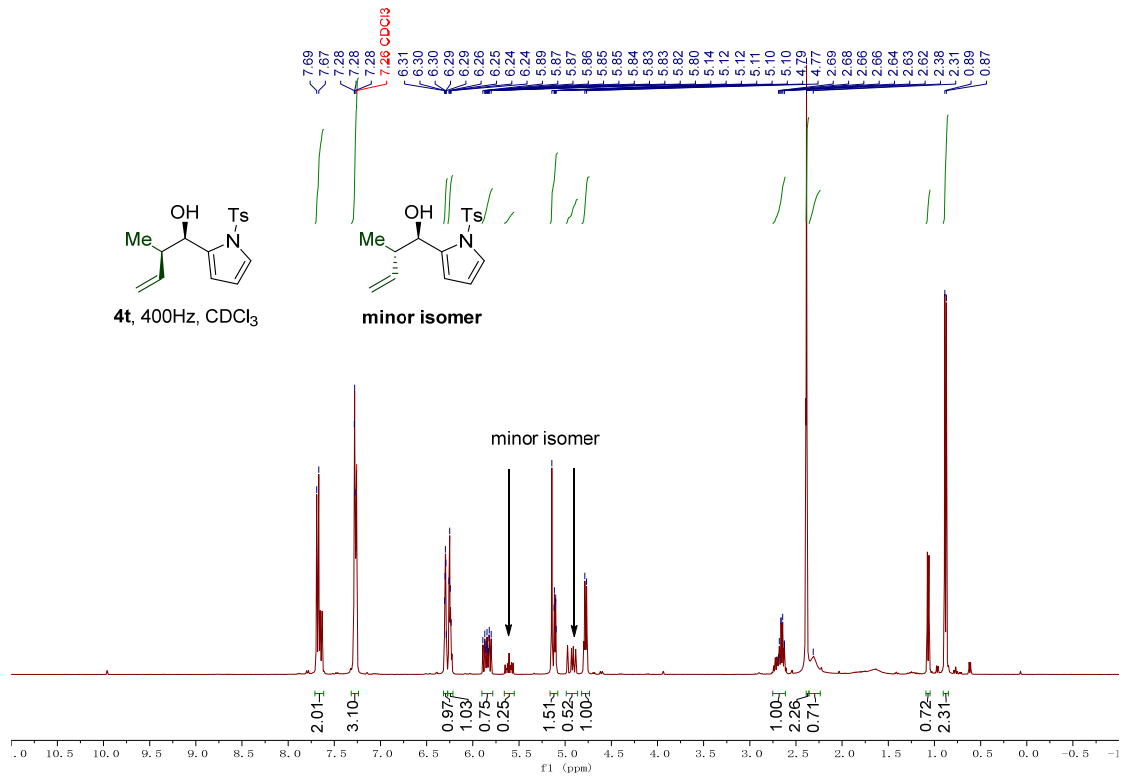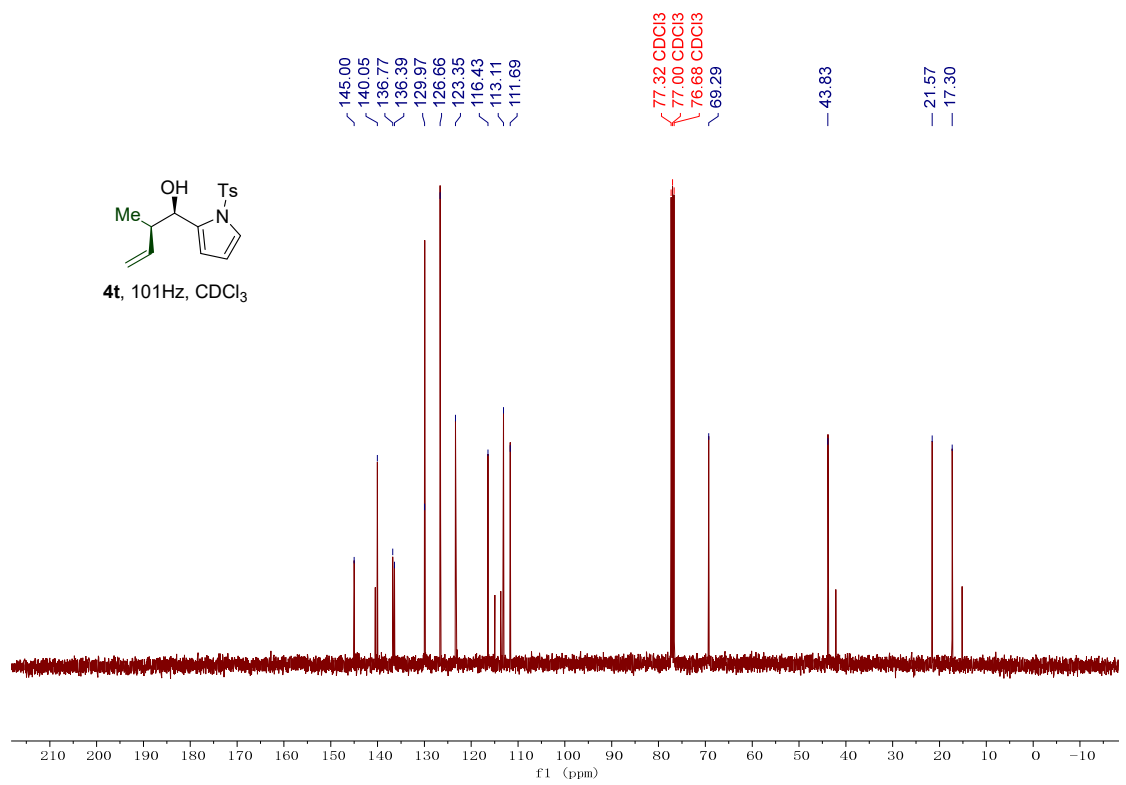

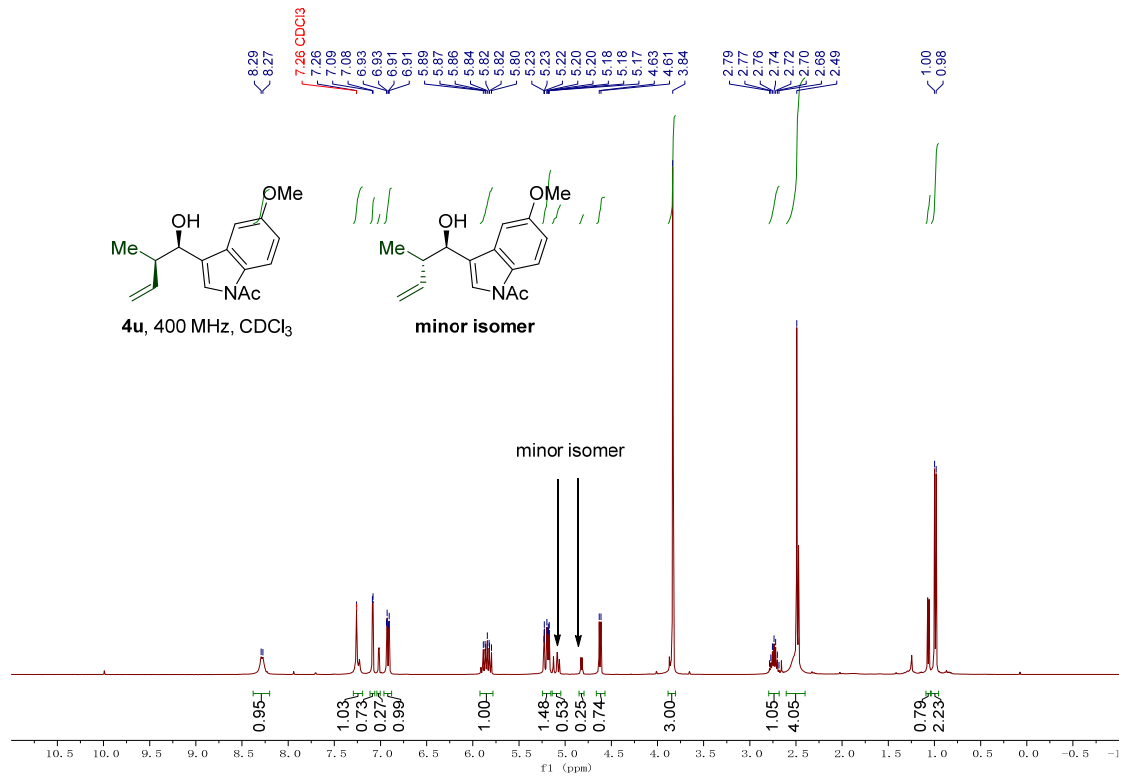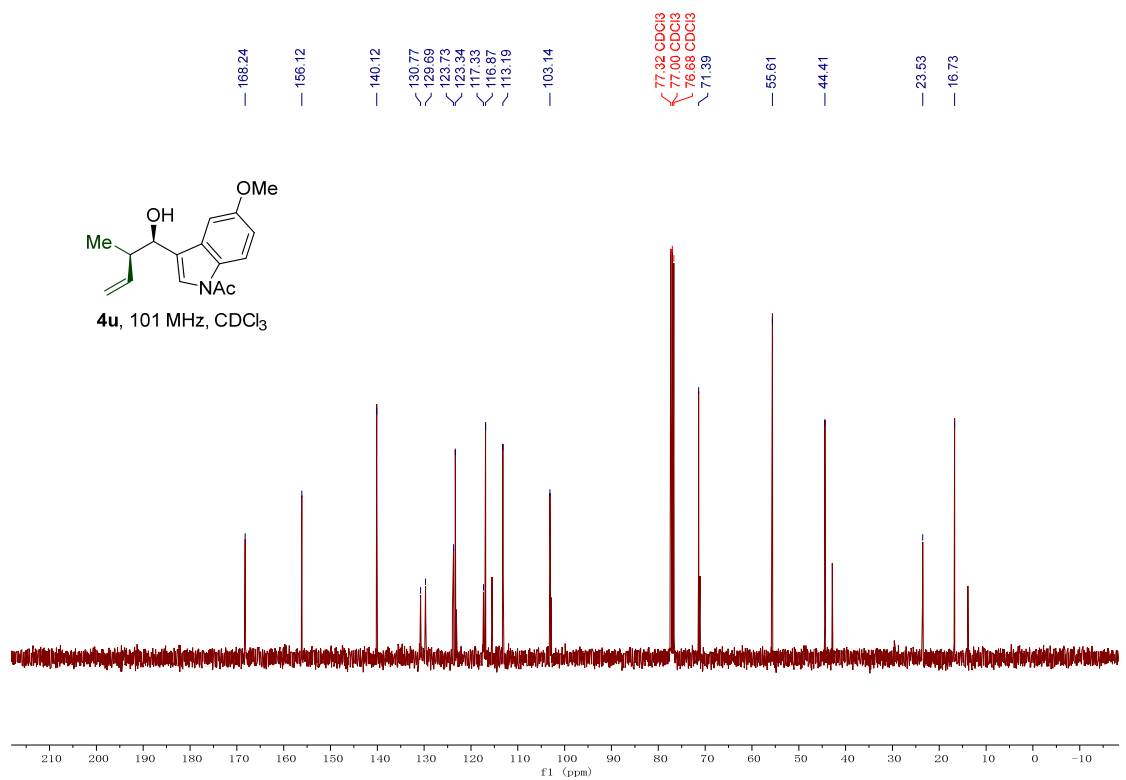

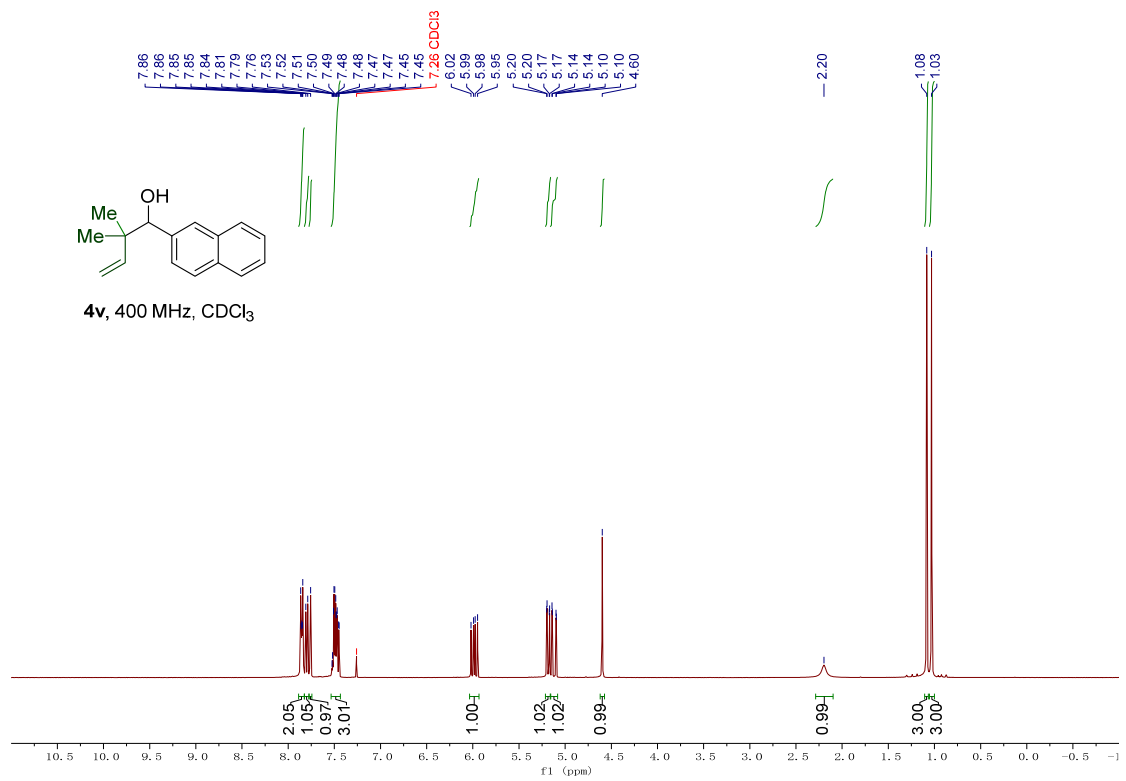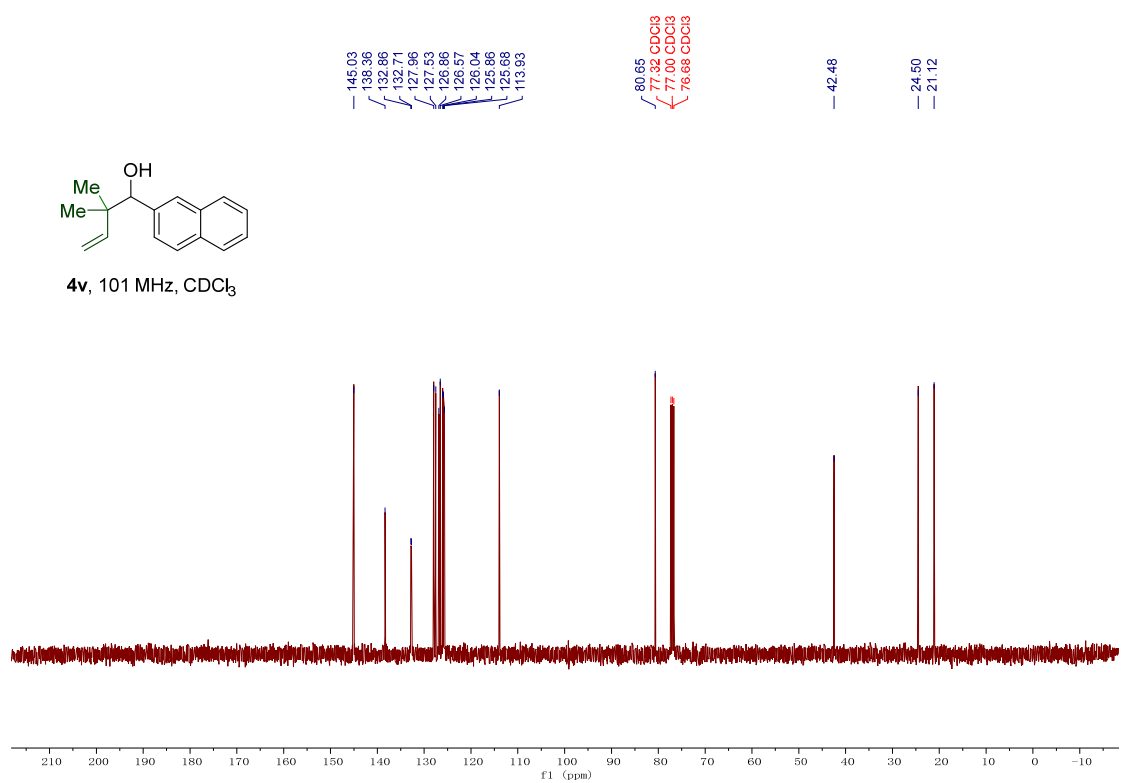

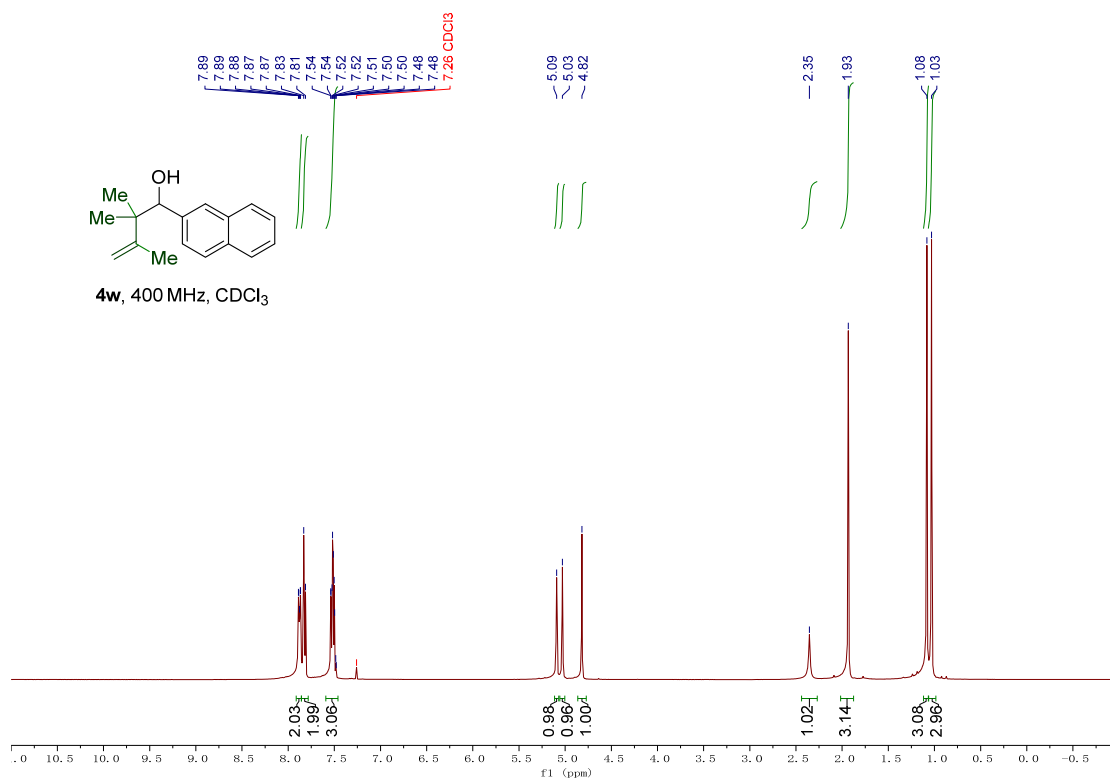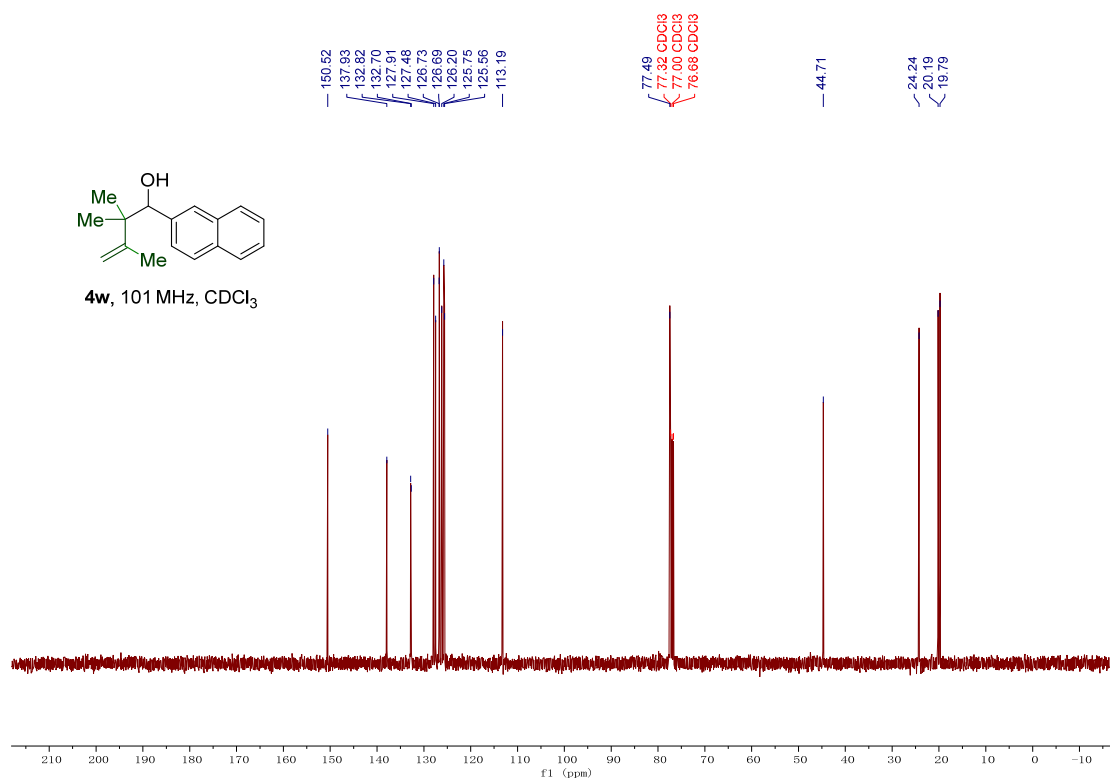

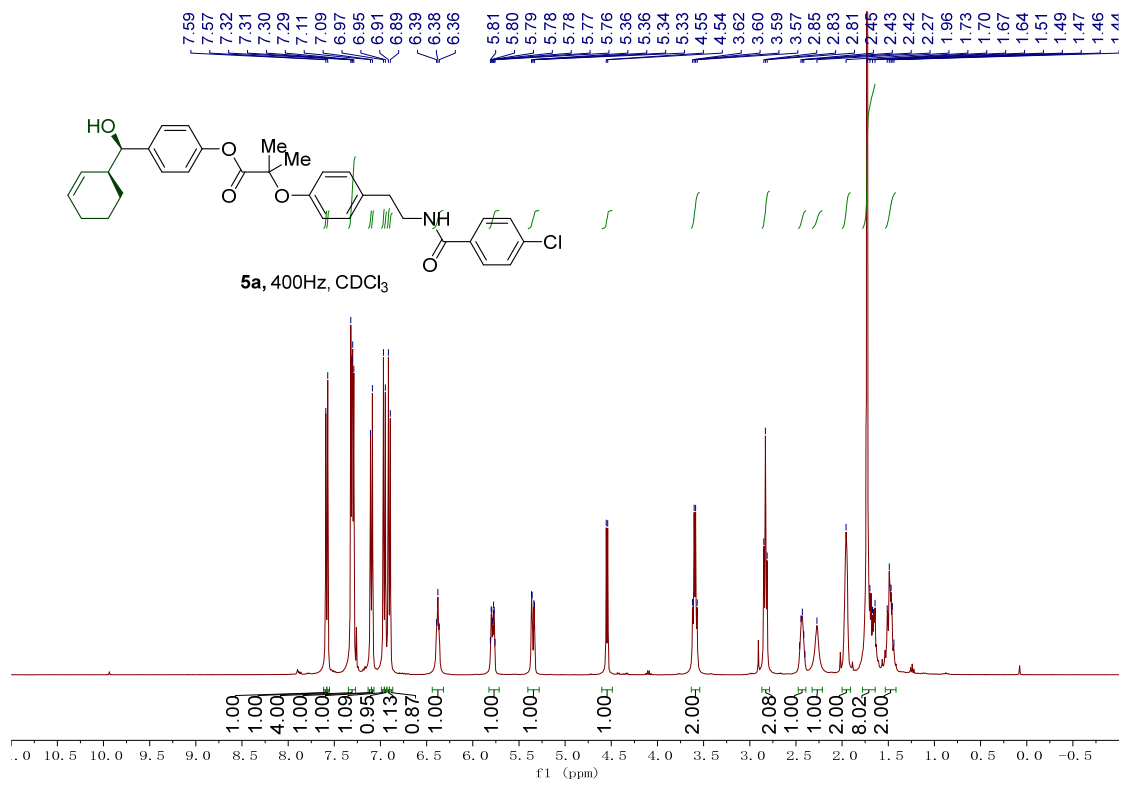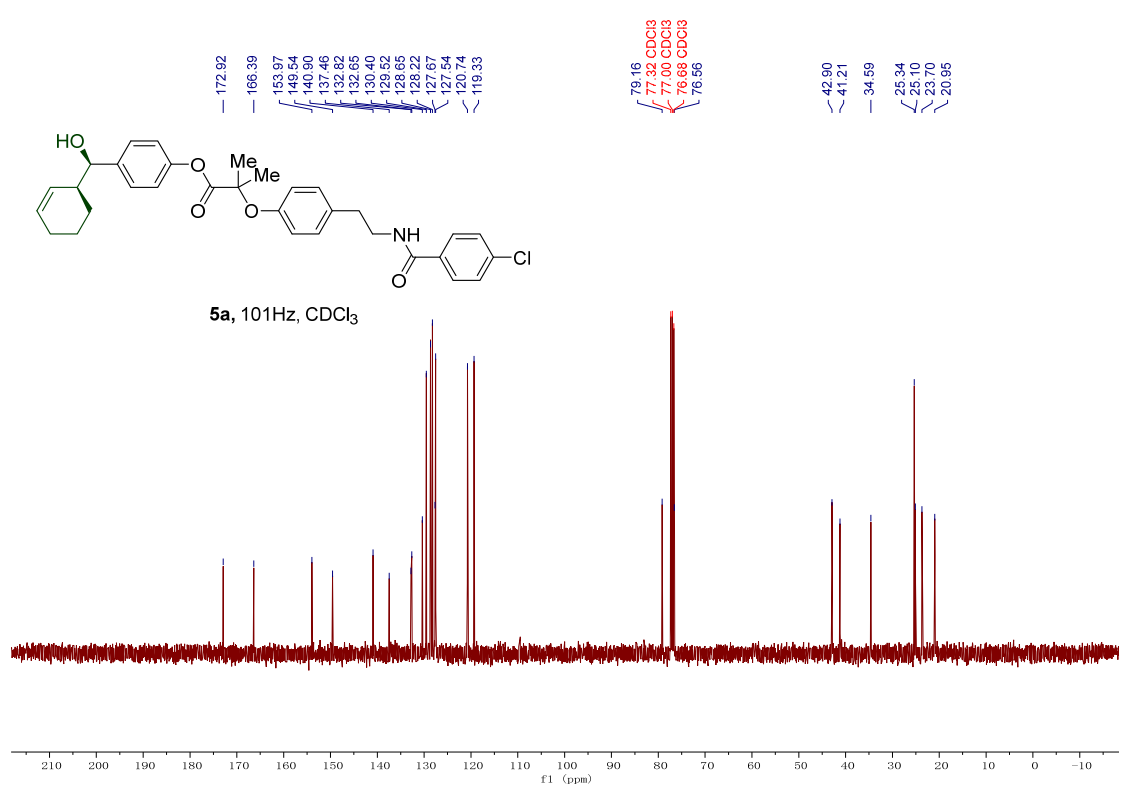

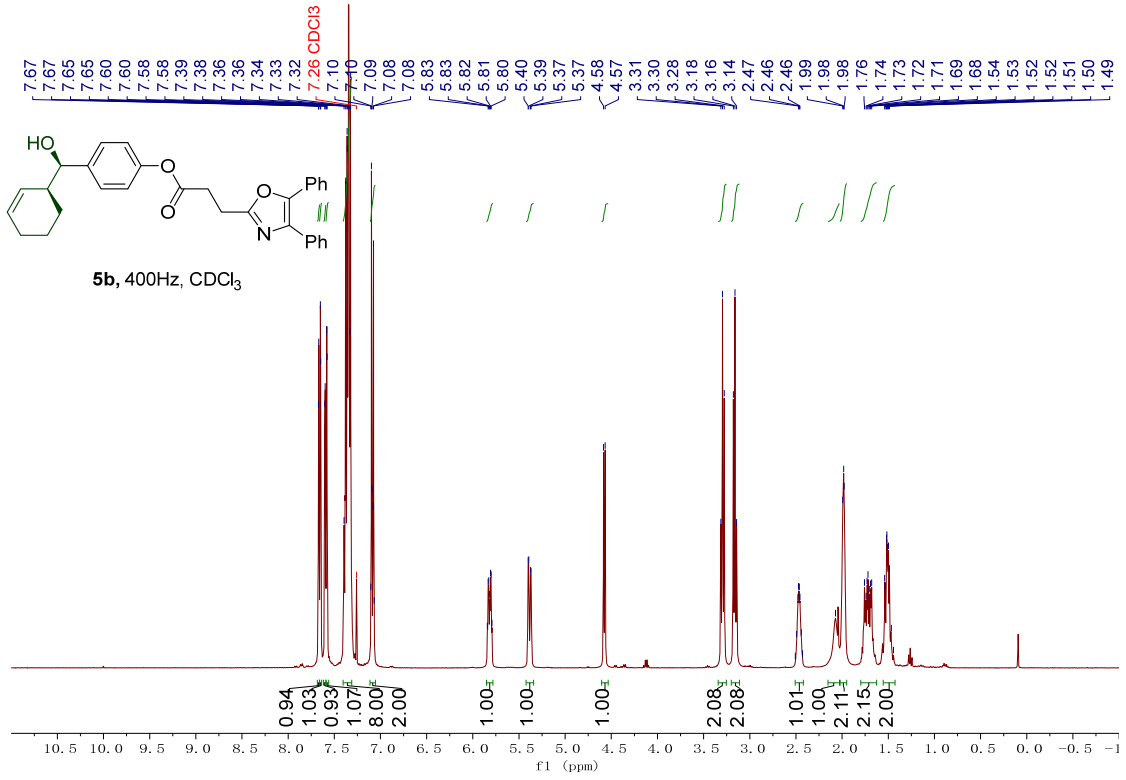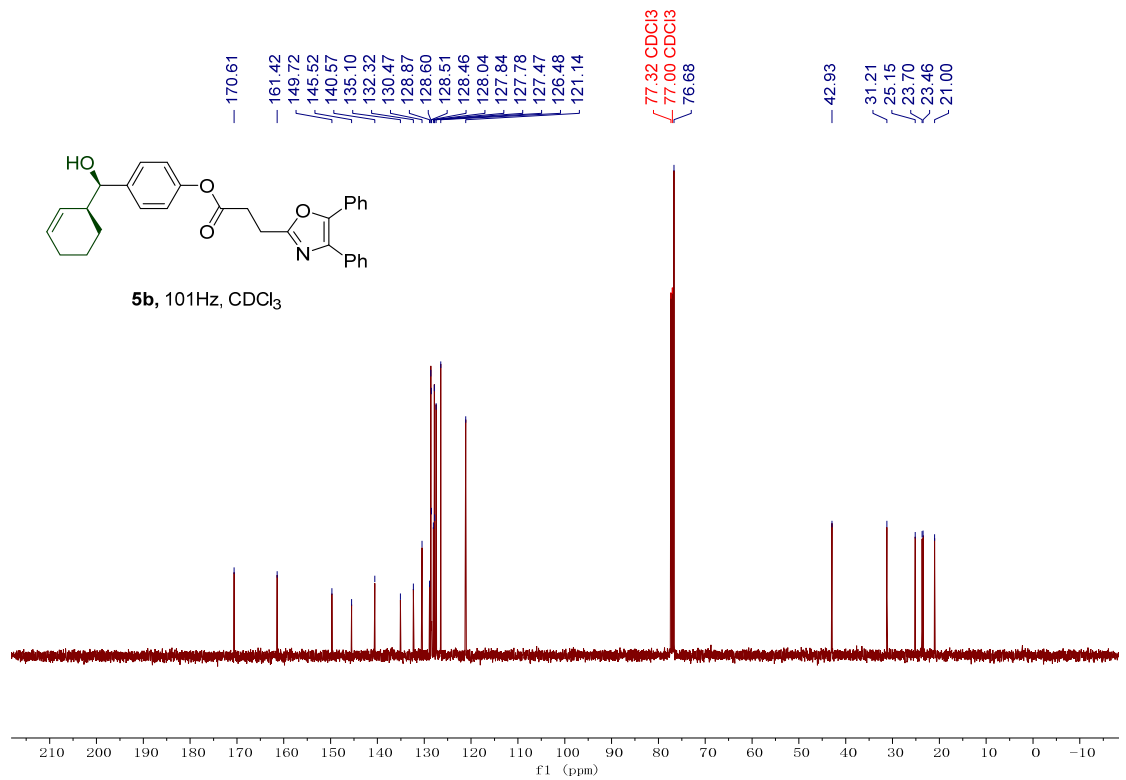

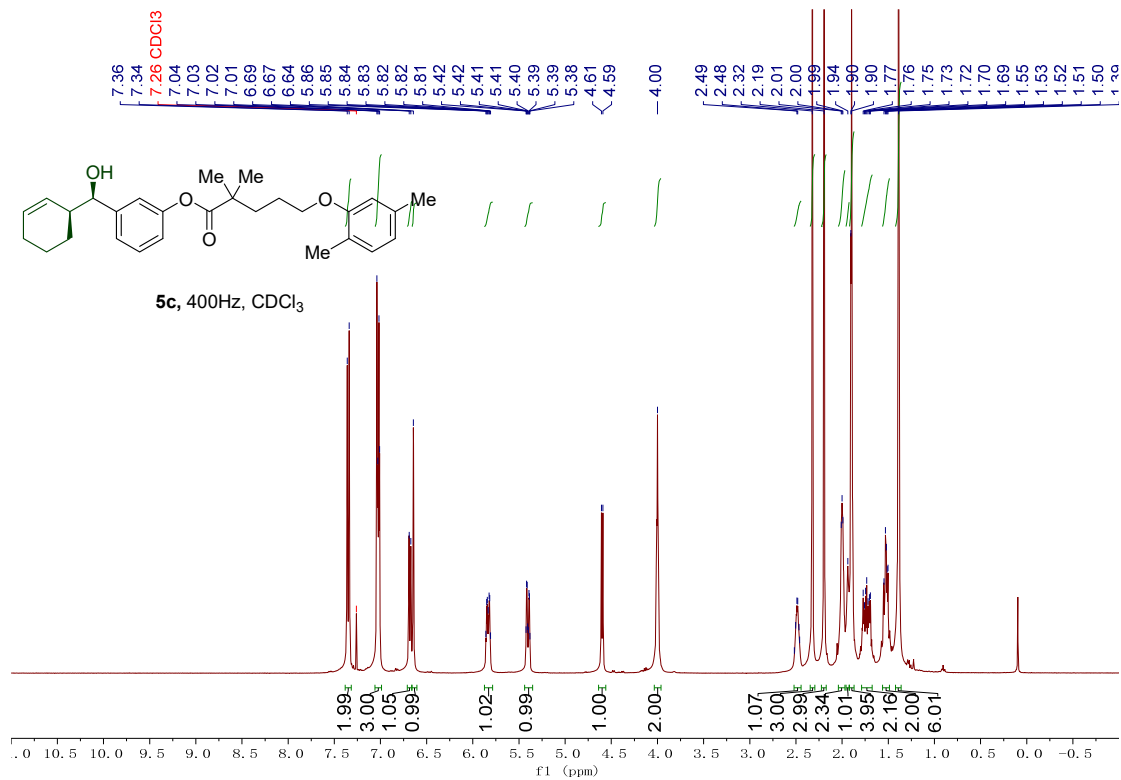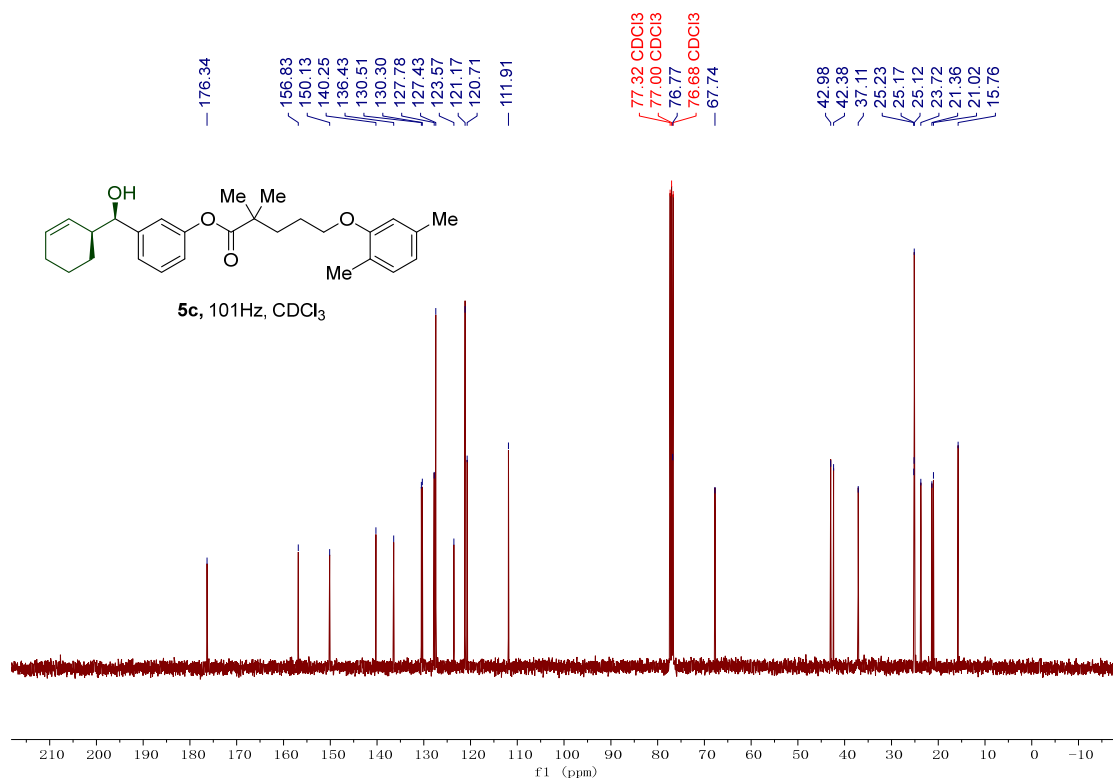

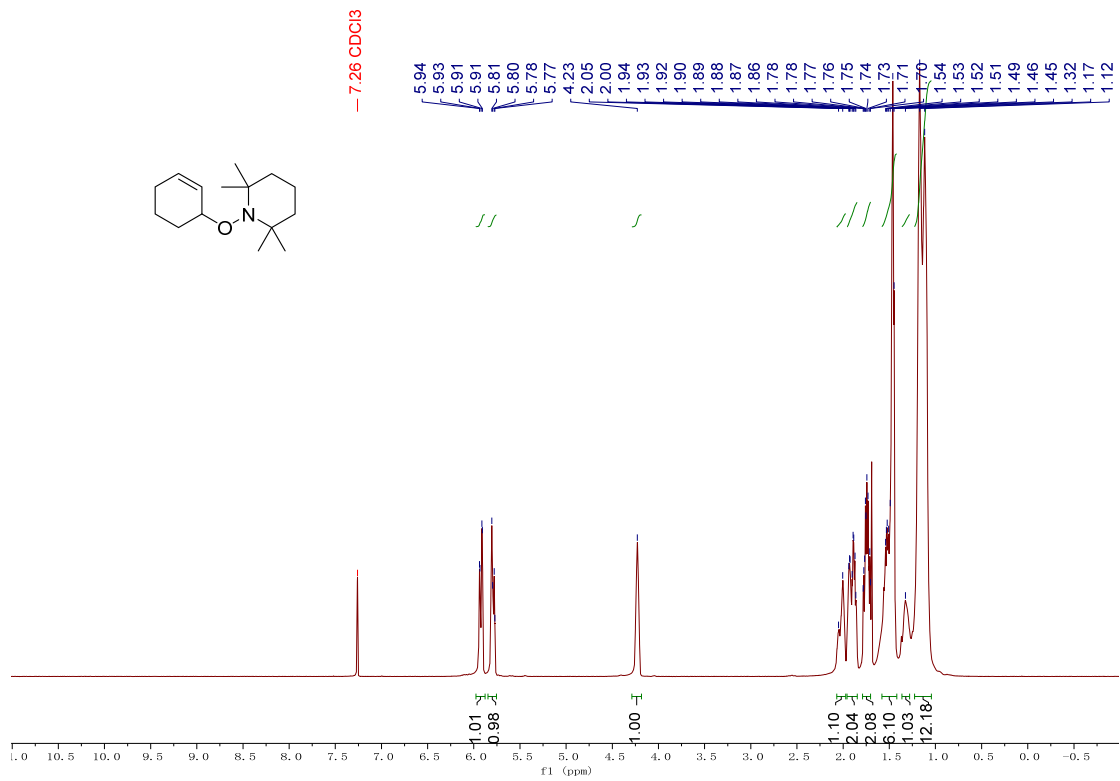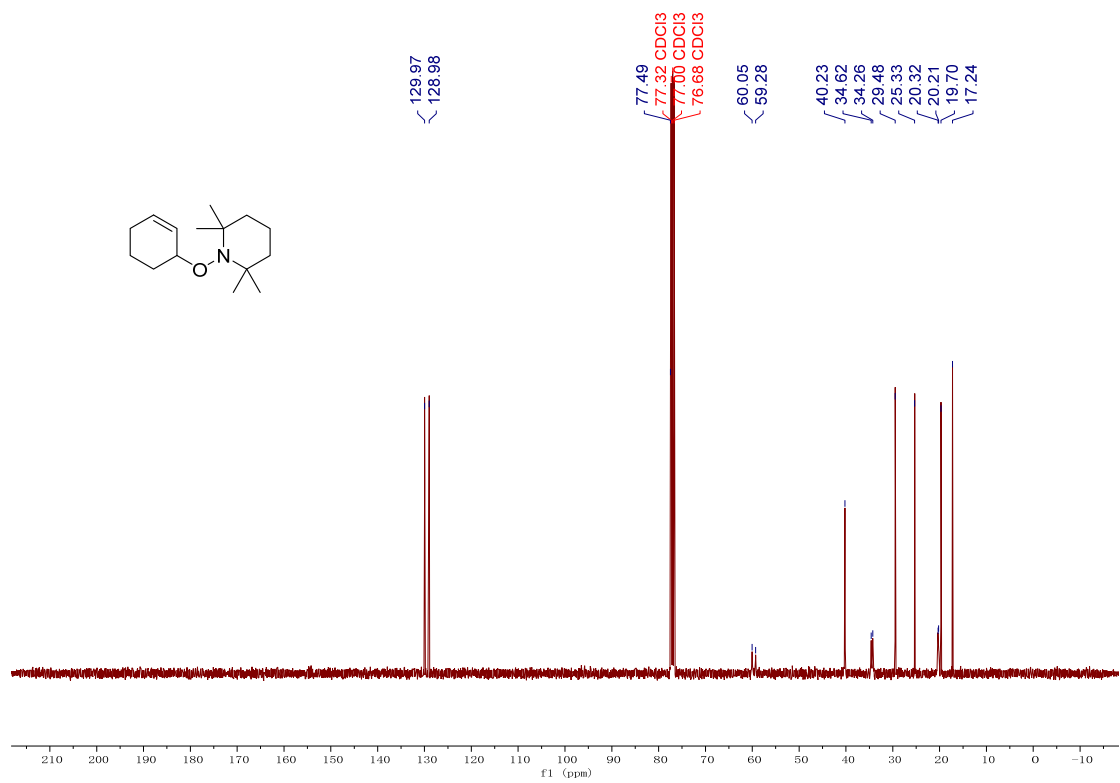

Supplement: d3qo01403g1.pdf [file d3qo01403g1.pdf]
